# Supplementary material for: Experimental and theoretical studies of the rhodium(i)-catalysed C–H oxidative alkenylation/cyclization ofN-(2-(methylthio)phenyl)benzamides with maleimides
Source: Royal Society of Chemistry journal article supplement (doi:10.1039/d3qo00023k), 2023-01-01
Supplement: d3qo00023k1.pdf [file d3qo00023k1.pdf]

## Supplementary Information

### Experimental and theoretical studies of the rhodium(I)-catalyzed C–H oxidative alkenylation/cyclization of *N*-(2-(methylthio)phenyl)benzamides with maleimides

Aymen Skhiri,<sup>a</sup> Attila Taborosi,<sup>b,e</sup> Nozomi Ohara,<sup>a</sup> Yusuke Ano,<sup>a</sup> Seiji Mori,<sup>\*b,d</sup> and Naoto Chatani<sup>a,c\*</sup>

<sup>a</sup> Department of Applied Chemistry, Faculty of Engineering, Osaka University, Suita, Osaka 565-0871, Japan

<sup>b</sup> Institute of Quantum Beam Science, Ibaraki University, Mito, Ibaraki 310-8512, Japan

<sup>c</sup> Research Center for Environmental Preservation, Osaka University, Suita, Osaka 565-0871, Japan

<sup>d</sup> Frontier Research Center for Applied Atomic Sciences, Ibaraki University, Tokai, Ibaraki 319-1106, Japan

<sup>e</sup> Research Initiative for Supra-Materials, Shinshu University, Nagano, Nagano 380-8553, Japan

#### Contents

|       |                                                                                                   |    |
|-------|---------------------------------------------------------------------------------------------------|----|
| I.    | General Information: .....                                                                        | 3  |
| II.   | Materials:.....                                                                                   | 3  |
| III.  | Synthesis of Starting Materials: .....                                                            | 4  |
| 1.    | General Procedure for the Preparation of Starting Amides:.....                                    | 4  |
| a.    | Synthesis of Amides from Acid Chlorides: .....                                                    | 4  |
| b.    | Synthesis of Amides from Carboxylic Acids:.....                                                   | 4  |
| 2.    | Spectroscopic Data of Starting Amides:.....                                                       | 4  |
| IV.   | Optimization of Reaction Conditions Using 4-Methyl- <i>N</i> -(2-(methylthio)phenyl)benzamide: .. | 9  |
| 1.    | Table S1: Screening of Rhodium Catalysts.....                                                     | 9  |
| 2.    | Table S2: Screening of Oxidants.....                                                              | 9  |
| 3.    | Table S3: Optimization of Reaction Conditions .....                                               | 10 |
| V.    | Kinetic Isotope Experiments: .....                                                                | 11 |
| 1.    | Table S4: Reaction Values of Kinetic Isotopic Effect.....                                         | 11 |
| 2.    | Deuterium Labelling Experiments: .....                                                            | 12 |
| VI.   | General Procedure for the Rh(I)-Catalyzed Reaction of Aromatic Amides with Maleimides: ..         | 17 |
| VII.  | X-Ray Crystallographic Structure Analysis: .....                                                  | 18 |
| 1.    | Table S5: Bond lengths (Å).....                                                                   | 20 |
| 2.    | Table S6: Bond angles (°).....                                                                    | 21 |
| VIII. | Spectroscopic Data of Products:.....                                                              | 22 |
| VIII. | Copies of <sup>1</sup> H & <sup>13</sup> C NMR Spectra: .....                                     | 30 |
| IX.   | Computational details:.....                                                                       | 59 |
| X.    | Whitesides correction and concentration correction: .....                                         | 60 |
| 1.    | Table S7: The values of the Whitesides correction of translational entropy .....                  | 60 |

|       |                                                                                                                                                                                                                                                                                                    |    |
|-------|----------------------------------------------------------------------------------------------------------------------------------------------------------------------------------------------------------------------------------------------------------------------------------------------------|----|
| XI.   | Energy decomposition analysis (EDA) .....                                                                                                                                                                                                                                                          | 61 |
| 2.    | Figure S1: The fragmentation for the energy decomposition analysis of the structures involved in the OA/MI, LLHT and CCBF paths. ....                                                                                                                                                              | 61 |
| 3.    | Table S8: The energy decomposition analysis of the structures involved in the OA/MI, LLHT and CCBF paths. ....                                                                                                                                                                                     | 62 |
| XII.  | Kinetic isotopic effect of the calculated reaction paths:.....                                                                                                                                                                                                                                     | 63 |
| 1.    | Table S9: The theoretical kinetic isotopic effect determined for the most important transition states of the reaction paths. ....                                                                                                                                                                  | 63 |
| XIII. | Conformational analysis of maleimide coordinated structures: .....                                                                                                                                                                                                                                 | 64 |
| 1.    | Figure S2: The fragmentation for the energy decomposition analysis of the structures involved in the OA/MI, LLHT and CCBF paths. ....                                                                                                                                                              | 65 |
| XIV.  | The usability of SMD single point calculations results.....                                                                                                                                                                                                                                        | 66 |
| 1.    | Table S10: The relative Gibbs free energies of LLHT, OA/MI and CCBF pathways with a different selection of DFT (B3LYP+D3BJ, M06) and post-HF (DLPNO-CCSD(T)) methods with different basis sets (def-2SVP, def2-TZVP, def2-TZVPP) and applied Whitesides (W) and concentration correction(cc). .... | 66 |
| XV.   | The bonding system of Rh-L during the reaction path.....                                                                                                                                                                                                                                           | 68 |
| 1.    | Table S11: The bond distances around the Rh(I) ion for the proposed mechanism intermediate and transition states, computed at the M06/def2-TZVP level.....                                                                                                                                         | 69 |
| 2.    | Table S12: The NPA charges of Rh(I) and connecting ligands for the proposed mechanism intermediate and transition states, computed at the M06/def2-TZVP level.....                                                                                                                                 | 69 |
| 3.    | Table S13: The bond orders (MBO) around Rh(I) ion for the proposed mechanism intermediate and transition states, computed at the M06/def2-TZVP level.....                                                                                                                                          | 70 |
| 4.    | Table S14: The critical points (3, -1) and the values (a.u.) of electron density ( $\rho$ ) distribution around the Rh(I) ion for the proposed mechanism intermediate and transition states, computed at the M06/def2-TZVP level. ....                                                             | 70 |
| XVI.  | Cartesian coordinates, absolute energies, and imaginary frequency of transition states.....                                                                                                                                                                                                        | 71 |
| XVII. | References: .....                                                                                                                                                                                                                                                                                  | 89 |

## I. General Information:

$^1\text{H}$  NMR and  $^{13}\text{C}$  NMR spectra were recorded on a JEOL ECS-400 spectrometer in  $\text{CDCl}_3$  with tetramethylsilane as the internal standard. All the data are reported as follow: chemical shift ( $\delta$ ) peaking in ppm, multiplicity (s = singlet, d = doublet, t = triplet, q = quartet, quin = quintet, sx = sextuplet and m = multiple), coupling constant ( $J$ ) in Hz, and integration. Infrared spectra (IR) were obtained using a JASCO FT/IR-4200 spectrometer; absorptions are reported in reciprocal centimeters with the following relative intensities: s (strong), m (medium), or w (weak). Mass spectra and high-resolution mass spectra (HRMS) were obtained on a JEOL JMS-700 spectrometer. Melting points were determined using a OptiMelt MPA 100 Automated melting point system (temperature measurement accuracy is 0.1  $^\circ\text{C}$ ). Column chromatography was performed with  $\text{SiO}_2$  (Silicycle Silica Flash F60 (230-400 mesh)) or NH Silica (Silica Gel 60 (special)  $\text{NH}_2$  (40-50  $\mu\text{m}$ )) for some starting materials. Also, we proceed the isolation for some product using there is compound was purified by LC-908 HPLC (GPC).

## II. Materials:

2-(methylthio)aniline (CAS 2987-53-3) from Tokyo Chemical Industry Co., Ltd. (TCI), oxalyl chloride (CAS 79-37-8) from TCI, pivalic acid (CAS 75-98-9) from (TCI),  $[\text{Rh}(\text{COD})\text{Cl}]_2$  (CAS 12092-47-6) from Wako Pure Chemical Co., Ltd. (Wako), 2,3-difluorobenzoic acid (CAS 4519-39-5) from (TCI), 1,4-benzoquinone (CAS 106-51-4) from (TCI), silver hexafluoroantimonate (CAS 26042-64-8) from (TCI), biphenyl-2-carboxylic acid (CAS 947-84-2) from (TCI), *o*-toluic Acid (CAS 118-90-1) from (TCI),  $[\text{Rh}(\text{CF}_3\text{CO}_2)_2]_2$  dimer (CAS 31326-95-1) from Aldrich,  $[\text{Rh}(\text{OAc})_2]_2$  (CAS 15956-28-2) from (TCI),  $[\text{Rh}(\text{CO})\text{Cl}(\text{PPh}_3)_2]$  (CAS 13938-94-8) from Strem Chemicals,  $[\text{Rh}(\text{acac})(\text{CO})_2]$  (CAS 14874-82-9) from Aldrich,  $\text{RhCl}_3 \cdot 3\text{H}_2\text{O}$  (CAS 20765-98-4) from Aldrich,  $[\text{RhCp}^*\text{Cl}_2]_2$  (CAS 12354-85-7) from Aldrich, acetic acid (CAS 64-19-7) from Chameleon reagent, cyclohexyl carboxylic acid (CAS 98-89-5) from TCI, copper (II) chloride (CAS 7447-39-4) from Wako, copper (II) acetate  $\cdot 2\text{H}_2\text{O}$  (CAS 6046-93-1) from Wako, manganese dioxide (CAS 1313-13-9) from Wako, silver acetate (CAS 563-63-3) from Wako, triethylamine (CAS 121-44-8) from Nacalai Tesque, 4-dimethylaminopyridine (CAS 1122-58-3) from Wako, *p*-toluoyl chloride (CAS 874-60-2) from TCI, *o*-toluoyl chloride (CAS 874-60-2) from TCI, 2-chlorobenzoyl chloride (CAS 609-65-4) from TCI, 2-bromobenzoyl chloride (CAS 7154-66-7) from TCI, 4-chlorobenzoyl chloride (CAS 122-01-0) from TCI, 4-butylbenzoyl chloride (CAS 28788-62-7) from TCI, *m*-toluoyl chloride (CAS 1711-06-4) from TCI, benzo[*b*]thiophene-2-carbonyl chloride (CAS 39827-11-7), from TCI, 1-naphthoyl chloride (CAS 879-18-5), from TCI, 3-bromo-2-methylbenzoic acid (CAS 76006-33-2) benzoic acid-*d*<sub>5</sub> (CAS 1079-02-3) from Cambridge Isotope Laboratories Inc., *N*-methylmaleimide (CAS 930-88-1) from TCI, *N*-ethylmaleimide (CAS 128-53-0) from TCI, *N*-phenylmaleimide (CAS 941-69-5) from TCI, *N*-cyclohexylmaleimide (CAS 1631-25-0) from TCI, *N*-benzylmaleimide (CAS 1631-26-1) from TCI.

### III. Synthesis of Starting Materials:

#### 1. General Procedure for the Preparation of Starting Amides:<sup>1,2</sup>

All amides bearing a 2-methylthiophenyl moiety were prepared by reacting the corresponding acids or the corresponding acid chlorides with 2-(methylthio)aniline (CAS 2987-53-3).

##### a. Synthesis of Amides from Acid Chlorides:

The acid chloride (5 mmol) was dissolved in CH<sub>2</sub>Cl<sub>2</sub> (20 mL). After cooling the reaction mixture to 0 °C, a solution of 2-(methylthio)aniline (5 mmol) and triethylamine (12 mmol) in 10 mL of CH<sub>2</sub>Cl<sub>2</sub> was added dropwise. The resulting mixture was allowed to slowly warm to room temperature and was then stirred overnight. The crude mixture was then washed with saturated aqueous NaHCO<sub>3</sub> (10 mL), and then extracted with CH<sub>2</sub>Cl<sub>2</sub> (3x10 mL). The combined organic layers were washed with a 1 M solution of HCl aq. (10 mL). The organic phase was dried over anhydrous Na<sub>2</sub>SO<sub>4</sub> and the resulting solution evaporated to dryness. The resulting crude amide was purified by flash chromatography on silica gel (hexanes/EtOAc = 5/1 as the eluent).

##### b. Synthesis of Amides from Carboxylic Acids:

To a stirred solution of a carboxylic acid (5 mmol) and in CH<sub>2</sub>Cl<sub>2</sub> (10 mL) that contained 5 drops of DMF, COCl<sub>2</sub> (0.5 mL, 6 mmol) was added dropwise at 0 °C. The solution was then magnetically stirred at room temperature for approximately for 2 h. The solvent was then removed under reduced pressure, and the resulting residue was dissolved in CH<sub>2</sub>Cl<sub>2</sub> (10 mL). After cooling the reaction mixture to 0 °C, 2-(methylthio)aniline (5 mmol) and triethylamine (12 mmol) in 10 mL of CH<sub>2</sub>Cl<sub>2</sub> were added dropwise. The resulting mixture was allowed to warm to room temperature and then stirred overnight. The crude product was washed with saturated aqueous NaHCO<sub>3</sub> (20 mL), and CH<sub>2</sub>Cl<sub>2</sub> (3x10 mL). After washing with a 1 M solution of HCl aq. (20 mL), the organic phase was dried over anhydrous Na<sub>2</sub>SO<sub>4</sub> and the solvent was removed by evaporation. The resulting crude amide was purified by flash chromatography on silica gel (hexanes/EtOAc = 5/1 as the eluent).

#### 2. Spectroscopic Data of Starting Amides:

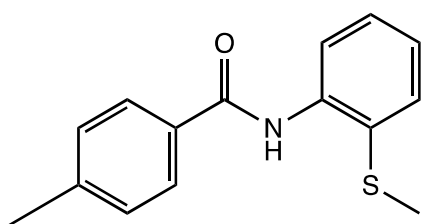

**4-methyl-N-(2-(methylthio)phenyl)benzamide [CAS 701289-62-5] (1a)<sup>3</sup>**

Quantitative yield.  $R_f = 0.26$  (hexane/ Et<sub>2</sub>O = 8/2). A white solid.

Mp = 76.6 °C

<sup>1</sup>H NMR (CDCl<sub>3</sub>, 400 MHz): δ 9.23 (brs, 1H), 8.54 (dd,  $J = 8.2$  Hz and 1.2 Hz, 1H), 7.84-7.87 (m, 2H), 7.54 (dd,  $J = 7.6$  Hz and 1.5 Hz, 1H), 7.30-7.38 (m, 3H), 7.08 (td,  $J = 7.6$  Hz and 1.2 Hz, 1H), 2.44 (s, 3H), 2.40 (s, 3H).

**HRMS** (EI)  $m/z$ :  $[M]^+$  Calcd for  $C_{15}H_{15}NOS$ : 257.0874; Found: 257.0875.

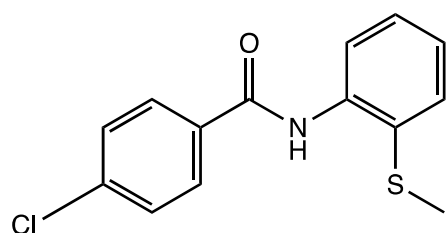

**4-chloro-*N*-(2-(methylthio)phenyl)benzamide [CAS 450364-76-8] (1b)**

95% yield.  $R_f$  = 0.43 (hexane/ Et<sub>2</sub>O = 8/2). A white solid. Mp = 113.9 °C

**<sup>1</sup>H NMR** (CDCl<sub>3</sub>, 400 MHz):  $\delta$  9.19 (brs, 1H), 8.48 (dd,  $J$  = 7.7 Hz and 0.7 Hz, 1H), 7.88-7.91 (m, 2H), 7.47-7.55 (m, 3H), 7.36 (td,  $J$  = 8.4 Hz and 1.2 Hz, 1H), 7.11 (td,  $J$  = 7.6 Hz and 1.1 Hz, 1H), 2.41 (s, 3H).

**<sup>13</sup>C NMR** (CDCl<sub>3</sub>, 100 MHz):  $\delta$  164.2, 138.5, 138.4, 133.4, 133.3, 129.4, 129.3, 128.65, 125.7, 124.8, 120.6, 19.4.

**HRMS** (EI)  $m/z$ :  $[M]^+$  Calcd for  $C_{18}H_{21}NOS$ : 277.0328; Found: 277.0327.

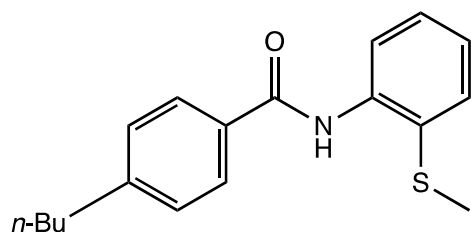

**4-butyl-*N*-(2-(methylthio)phenyl)benzamide (1c)**

89% yield.  $R_f$  = 0.47 (hexane/ Et<sub>2</sub>O = 8/2). A colorless oil.

**<sup>1</sup>H NMR** (CDCl<sub>3</sub>, 400 MHz):  $\delta$  9.20 (brs, 1H), 8.51 (d,  $J$  = 8.2 Hz, 1H), 7.85 (d,  $J$  = 8.0 Hz, 2H), 7.49 (d,  $J$  = 7.6 Hz, 1H), 7.07-7.33 (m, 3H), 7.05 (t,  $J$  = 7.6 Hz, 1H), 2.65 (t,  $J$  = 7.5 Hz, 2H), 2.36 (s, 3H), 1.60 (quin,  $J$  = 7.5 Hz, 2H), 1.34 (sext,  $J$  = 7.5 Hz, 2H), 0.92 (t,  $J$  = 7.5 Hz, 3H).

**<sup>13</sup>C NMR** (CDCl<sub>3</sub>, 100 MHz):  $\delta$  165.0, 147.3, 138.6, 133.1, 132.1, 129.0, 128.8, 127.1, 125.5, 124.2, 120.4, 35.5, 33.2, 22.2, 19.0, 13.99.

**IR** (ATR) (neat,  $\nu/cm^{-1}$ ): 3348 w, 2955 w, 2926 w, 2858 w, 2360 w, 2340 w, 1523 m, 1502 s, 1432 s, 1304 m, 754 m.

**MS**  $m/z$  (relative intensity, %): 299 ( $M^+$ , 20), 253 (12), 252 (64), 162 (15), 161 (100), 91 (17).

**HRMS** (EI)  $m/z$ :  $[M]^+$  Calcd for  $C_{18}H_{21}NOS$ : 299.1344; Found: 299.1347.

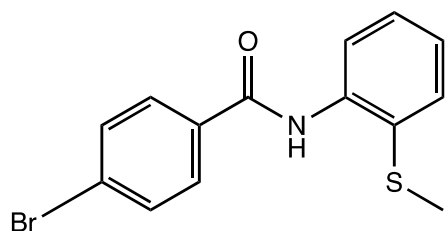

**4-bromo-*N*-(2-(methylthio)phenyl)benzamide [CAS 862657-83-8] (1d)**

Quantitative yield.  $R_f$  = 0.28 (hexane/ Et<sub>2</sub>O = 8/2). A white solid. Mp = 117.9 °C

**<sup>1</sup>H NMR** (CDCl<sub>3</sub>, 400 MHz):  $\delta$  9.20 (brs, 1H), 8.50 (dd,  $J$  = 8.2 Hz and 1.1 Hz, 1H), 7.74-7.84 (m, 2H), 7.68-7.65 (m, 2H), 7.55 (dd,  $J$  = 7.7 Hz and 1.1 Hz, 1H), 7.35-7.39 (m, 1H) 7.12-7.15 (m, 2H), 2.41 (s, 3H).

**<sup>13</sup>C NMR** (CDCl<sub>3</sub>, 100 MHz):  $\delta$  164.3, 138.40, 133.8, 133.4, 132.24, 129.3, 128.8, 126.9, 125.7, 124.8, 120.6, 19.4.

**HRMS** (EI)  $m/z$ :  $[M]^+$  Calcd for  $C_{14}H_{21}BrNOS$ : 320.9823; Found: 320.9821.

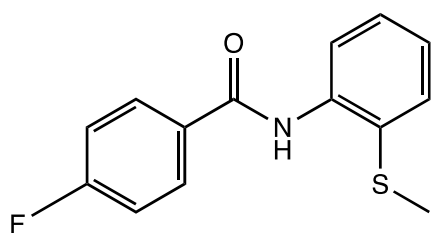

**4-fluoro-*N*-(2-(methylthio)phenyl)benzamide [CAS 708243-62-3] (1e)**

Quantitative yield.  $R_f = 0.25$  (hexane/ Et<sub>2</sub>O = 8/2). A white solide. Mp = 77.6 °C

<sup>1</sup>H NMR (CDCl<sub>3</sub>, 400 MHz): δ 9.18 (brs, 1H), 8.50 (dd,  $J = 8.2$  Hz and 1.1 Hz, 1H), 7.95-7.98 (m, 2H), 7.55 (dd,  $J = 7.8$  Hz and 1.6 Hz, 1H), 7.36 (td,  $J = 8.4$  Hz and 1.3 Hz, 1H), 7.19-7.22 (tm, 2H) 7.12 (td,  $J = 7.6$  Hz and 1.3 Hz, 1H), 2.41 (s, 3H).

<sup>13</sup>C NMR (CDCl<sub>3</sub>, 100 MHz): δ 165.1 (d,  $J = 251$  Hz), 164.2, 138.5, 133.4, 131.1 (d,  $J = 3.8$  Hz), 129.60 (d,  $J = 9.6$  Hz), 129.3, 125.7, 124.7, 120.6, 116.08 ( $J = 22.1$  Hz), 19.3.

HRMS (EI) m/z: [M]<sup>+</sup> Calcd for C<sub>14</sub>H<sub>12</sub>FNOS: 261.0624; Found: 261.0627.

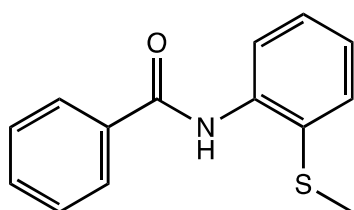

***N*-(2-(methylthio)phenyl)benzamide [CAS 51942-32-6] (1f)<sup>3</sup>**

Quantitative yield.  $R_f = 0.38$  (hexane/ Et<sub>2</sub>O = 8/2). A pale yellow solid. Mp = 96.1 °C

<sup>1</sup>H NMR (CDCl<sub>3</sub>, 400 MHz): δ 9.25 (brs, 1H), 8.53 (dd,  $J = 8.2$  Hz and 1.1 Hz, 1H), 7.94-7.97 (m, 2H), 7.50-7.59 (m, 4H), 7.36 (td,  $J = 8.4$  Hz and 1.3 Hz, 1H), 7.10 (td,  $J = 7.5$  Hz and 1.0 Hz, 1H), 2.38 (s, 3H).

<sup>13</sup>C NMR (CDCl<sub>3</sub>, 100 MHz): δ 165.3, 138.8, 135.0, 133.5, 132.1, 129.4, 129.0, 127.2, 125.5, 124.6, 120.5, 19.4.

HRMS (EI) m/z: [M]<sup>+</sup> Calcd for C<sub>14</sub>H<sub>13</sub>NOS: 243.0718; Found: 243.0718.

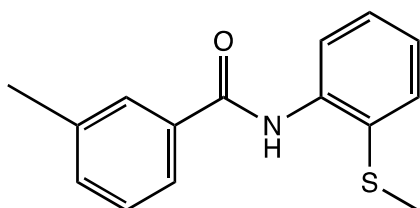

**3-methyl-*N*-(2-(methylthio)phenyl)benzamide [CAS 903797-73-9] (1g)<sup>3</sup>**

73% yield.  $R_f = 0.27$  (hexane/ Et<sub>2</sub>O = 8/2). A pale yellow solid. Mp = 99.4 °C

<sup>1</sup>H NMR (CDCl<sub>3</sub>, 400 MHz): δ 9.21 (s, 1H), 8.53 (dd,  $J = 8.2$  Hz and 1.5 Hz, 1H), 7.78 (s, 1H), 7.72-7.73 (m, 1H), 7.53-7.56 (dd,  $J = 7.7$  Hz, and 1.3 Hz, 1H), 7.34-7.42 (m, 3H), 7.11 (td,  $J = 7.5$  Hz and 1.4 Hz, 1H), 2.46 (s, 3H), 2.41 (s, 3H).

<sup>13</sup>C NMR (CDCl<sub>3</sub>, 100 MHz): δ 165.6, 139.0, 138.8, 135.0, 133.5, 132.9, 129.4, 128.9, 128.1, 125.6, 124.6, 124.1, 120.6, 21.6, 19.4.

HRMS (EI) m/z: [M]<sup>+</sup> Calcd for C<sub>15</sub>H<sub>15</sub>NOS: 257.0874; Found: 257.0876.

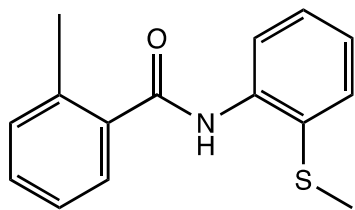

**2-methyl-*N*-(2-(methylthio)phenyl)benzamide [CAS 708220-13-7] (1h)<sup>4</sup>**

92% yield.  $R_f = 0.22$  (hexane/ Et<sub>2</sub>O = 8/2). A white solid. Mp = 65.4 °C

<sup>1</sup>H NMR (CDCl<sub>3</sub>, 400 MHz): δ 8.65 (brs, 1H), 8.50 (d,  $J = 7.8$  Hz, 1H), 7.59-7.57 (m, 1H), 7.52 (dd,  $J = 7.7$  Hz and 1.3 Hz, 1H), 7.33-7.41 (m, 2H), 7.27-7.31 (m, 2H), 7.12 (td,  $J = 7.5$  Hz and 1.3 Hz, 1H), 2.57 (s, 3H), 2.39 (s, 3H).

<sup>13</sup>C NMR (CDCl<sub>3</sub>, 100 MHz): δ 168.1, 138.6, 136.9, 136.4, 133.1, 131.6, 130.6, 129.1, 127.0, 126.2, 125.8, 124.8, 120.8, 20.3, 19.2.

HRMS (EI)  $m/z$ : [M]<sup>+</sup> Calcd for C<sub>15</sub>H<sub>15</sub>NOS: 257.0874; Found: 257.0876.

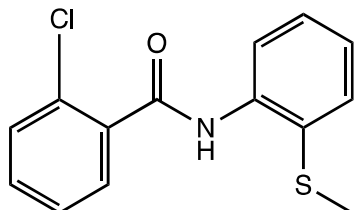

**2-chloro-*N*-(2-(methylthio)phenyl)benzamide [CAS 450364-76-8] (1i)**

Quantitative yield.  $R_f = 0.26$  (hexane/ Et<sub>2</sub>O = 8/2). A white solid. Mp = 45.0 °C

<sup>1</sup>H NMR (CDCl<sub>3</sub>, 400 MHz): δ 8.99 (brs, 1H), 8.51 (d,  $J = 8.2$  Hz, 1H), 7.75 (dd,  $J = 7.5$  Hz and 2.0 Hz, 1H), 7.51 (dd,  $J = 7.8$  Hz and 1.4 Hz, 1H), 7.32-7.46 (m, 4H), 7.11 (td,  $J = 7.4$  Hz and 1.4 Hz 1H), 2.36 (s, 3H).

<sup>13</sup>C NMR (CDCl<sub>3</sub>, 100 MHz): δ 164.7, 138.2, 135.4, 133.2, 131.7, 130.7, 130.5, 130.2, 129.0, 127.3, 126.0, 124.9, 120.9, 19.3.

HRMS (EI)  $m/z$ : [M]<sup>+</sup> Calcd for C<sub>14</sub>H<sub>12</sub>ClNOS: 277.0328; Found: 277.0328.

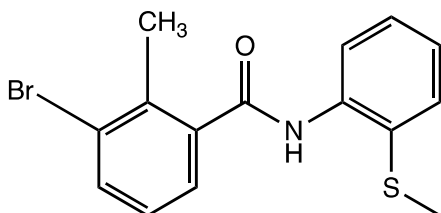

**3-bromo-2-methyl-*N*-(2-(methylthio)phenyl)benzamide [CAS 1498493-84-7] (1j)**

76% yield.  $R_f = 0.25$  (hexane/ Et<sub>2</sub>O = 8/2). A white solid. Mp = 97.6 °C

<sup>1</sup>H NMR (CDCl<sub>3</sub>, 400 MHz): δ 8.65 (brs, 1H), 8.52 (d,  $J = 8.0$  Hz, 1H), 7.52 (d,  $J = 7.1$  Hz, 1H), 7.28-7.39 (m, 4H), 7.12 (td,  $J = 7.7$  Hz and 0.8 Hz, 1H), 2.48 (s, 3H), 2.38 (s, 3H).

<sup>13</sup>C NMR (CDCl<sub>3</sub>, 100 MHz): δ 166.7, 139.7, 139.3, 138.4, 133.4, 132.4, 129.2, 127.6, 126.4, 125.8, 125.0, 121.7, 120.90, 23.7, 19.5.

HRMS (EI)  $m/z$ : [M]<sup>+</sup> Calcd for C<sub>15</sub>H<sub>14</sub>BrNOS: 334.9979; Found: 334.9982.

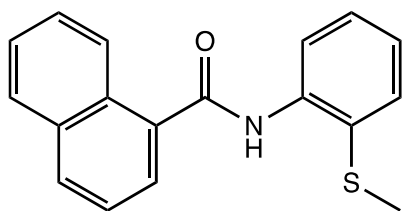

***N*-(2-(methylthio)phenyl)-1-naphthamide [CAS 920228-77-9] (1k)**

86% yield.  $R_f = 0.13$  (hexane/ Et<sub>2</sub>O = 8/2). A white yellow solid. Mp = 100.4 °C

<sup>1</sup>H NMR (CDCl<sub>3</sub>, 400 MHz): δ 8.87 (brs, 1H), 8.60 (d,  $J = 7.5$  Hz, 1H), 8.47 (d,  $J = 8.2$  Hz, 1H), 7.98 (d,  $J = 8.4$  Hz, 1H), 7.91 (d,  $J = 7.5$  Hz, 1H), 7.81 (d,  $J = 6.6$  Hz, 1H), 7.51-7.61 (m, 4H), 7.39 (t,  $J = 7.5$  Hz, 1H), 7.13 (td,  $J = 7.5$  Hz and 1.1 Hz, 1H) 2.36 (s, 3H).

<sup>13</sup>C NMR (CDCl<sub>3</sub>, 100 MHz): δ 167.6, 138.6, 134.5, 134.0, 133.1, 131.4, 130.3, 129.1, 128.6, 127.5, 126.7, 125.5, 125.4, 125.0, 124.9, 120.9, 19.2.

HRMS (EI) m/z: [M]<sup>+</sup> Calcd for C<sub>18</sub>H<sub>15</sub>NOS: 293.0874; Found: 293.0878.

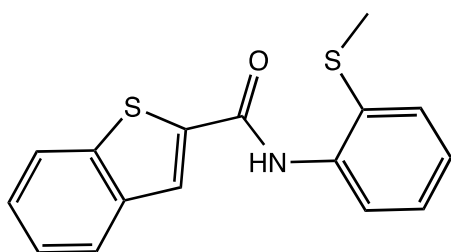

***N*-(2-(methylthio)phenyl)benzo[*b*]thiophene-2-carboxamide [CAS 1801979-19-0] (1l)<sup>5</sup>**

Quantitative yield.  $R_f = 0.40$  (hexane/ Et<sub>2</sub>O = 8/2). A white solid. Mp = 100.8 °C

<sup>1</sup>H NMR (CDCl<sub>3</sub>, 400 MHz): δ 9.28 (brs, 1H), 8.50 (d,  $J = 8.0$  Hz, 1H), 7.90-7.94 (m, 3H), 7.36-7.58 (c, 4H), 7.12 (t,  $J = 7.3$  Hz, 1H), 2.45 (s, 3H).

<sup>13</sup>C NMR (CDCl<sub>3</sub>, 100 MHz): δ 160.3, 141.4, 139.3, 139.2, 138.5, 133.8, 129.6, 126.8, 125.7, 125.4, 125.3, 124.8, 122.9, 120.5, 19.6.

HRMS (EI) m/z: [M]<sup>+</sup> Calcd for C<sub>16</sub>H<sub>13</sub>NOS<sub>2</sub>: 299.0439; Found: 299.0443.

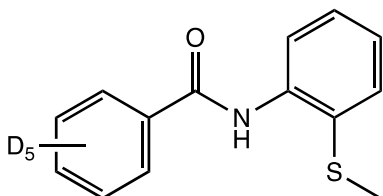

***N*-(2-(methylthio)phenyl)benzamide-*d*<sub>5</sub> (1f-*d*<sub>5</sub>)**

Quantitative yield.  $R_f = 0.38$  (hexane/ Et<sub>2</sub>O = 8/2). A pale yellow solid. Mp = 96.1 °C

<sup>1</sup>H NMR (CDCl<sub>3</sub>, 400 MHz): δ 9.24 (brs, 1H), 8.53 (dd,  $J = 8.2$  Hz and 1.0 Hz, 1H), 7.54 (dd,  $J = 7.8$  Hz and 1.4 Hz), 7.36 (td,  $J = 7.8$  Hz and 1.4 Hz, 1H), 7.10 (td,  $J = 8.4$  Hz and 1.4 Hz, 1H), 2.40 (s, 3H).



#### IV. Optimization of Reaction Conditions Using 4-Methyl-*N*-(2-(methylthio)phenyl)benzamide:

##### 1. Table S1: Screening of Rhodium Catalysts.

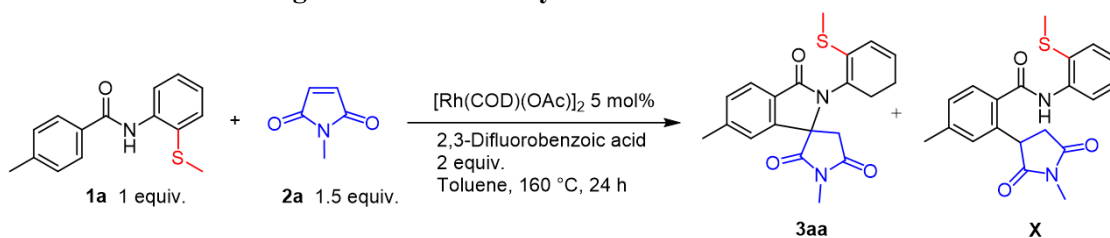

| Reaction Number | Entry | Catalyst                                             | Catalyst Loading | NMR Yields% |     |    |
|-----------------|-------|------------------------------------------------------|------------------|-------------|-----|----|
|                 |       |                                                      |                  | 3aa         | X   | SM |
| ac 507          | 1     | [Rh(II)(OAc) <sub>2</sub> ] <sub>2</sub>             | 5 mol%           | 48          | n.d | 50 |
| ac 508          | 2     | [Rh(I)(COD)Cl] <sub>2</sub>                          | 5 mol%           | 84          | n.d | 12 |
| ac 509          | 3     | [Rh(CF <sub>3</sub> COO) <sub>2</sub> ] <sub>2</sub> | 5 mol%           | 56          | n.d | 41 |
| ac 510          | 4     | [Rh(COD)(OAc)] <sub>2</sub>                          | 5 mol%           | 52          | n.d | 49 |
| ac 511          | 5     | [Rh(CO)Cl(PPh <sub>3</sub> ) <sub>2</sub> ]          | 10 mol%          | n.d         | n.d | 97 |
| ac 512          | 6     | [Rh(acac)(CO) <sub>2</sub> ]                         | 10 mol%          | 39          | n.d | 61 |
| ac 513          | 7     | RhCl <sub>3</sub> · 3H <sub>2</sub> O                | 10 mol%          | Tr          | n.d | 96 |
| ac 520          | 8     | RhCp*Cl <sub>2</sub>                                 | 10 mol%          | 43          | n.d | 51 |

##### 2. Table S2: Screening of Oxidants.

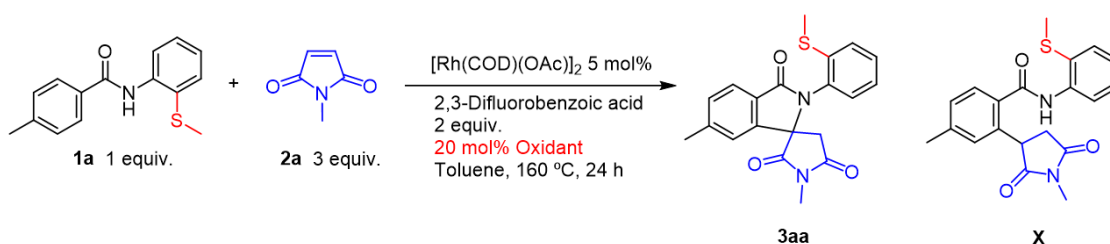

| Reaction Number | Entry | Oxidant                    | Oxidant Loading | NMR Yields% |     |    |
|-----------------|-------|----------------------------|-----------------|-------------|-----|----|
|                 |       |                            |                 | 3aa         | X   | SM |
| ac 531          | 1     | CuCl <sub>2</sub>          | 20 mol%         | 17          | n.d | 81 |
| ac 532          | 2     | Cu(OAc) · H <sub>2</sub> O | 20 mol%         | 32          | n.d | 67 |
| ac 533          | 3     | MnO <sub>2</sub>           | 20 mol%         | 48          | n.d | 51 |
| ac 534          | 4     | AgOAc                      | 20 mol%         | 22          | n.d | 75 |
| ac 535          | 5     | AgSbF <sub>6</sub>         | 20 mol%         | n.d         | n.d | 98 |
| ac 542          | 6     | p-benzoquinone             | 20 mol%         | 24          | n.d | 74 |

### 3. Table S3: Optimization of Reaction Conditions<sup>a</sup>

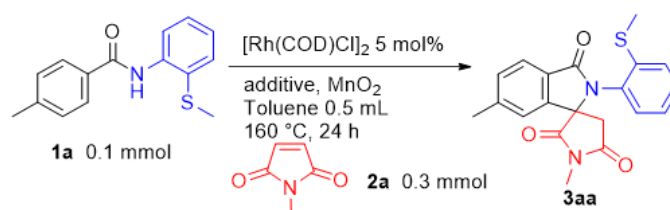

| Entry             | Additive                                              | Maleimide  | $\text{MnO}_2$ | Yields (%) |
|-------------------|-------------------------------------------------------|------------|----------------|------------|
| 1                 | 2,3-Difluorobenzoic acid 2 equiv.                     | 3 equiv.   | 0.5 equiv.     | 62         |
| 2                 | 2,3-Difluorobenzoic acid 2 equiv.                     | 3 equiv.   | 1 equiv.       | 50         |
| 3                 | 2,3-Difluorobenzoic acid 2 equiv.                     | 3 equiv.   | 2 equiv.       | trace      |
| 4                 | 2,3-Difluorobenzoic acid 0.5 equiv.                   | 3 equiv.   | 0.5 equiv.     | 49         |
| 5                 | 2,3-Difluorobenzoic acid 1 equiv.                     | 3 equiv.   | 0.5 equiv.     | 53         |
| 6                 | 2,3-Difluorobenzoic acid 3 equiv.                     | 3 equiv.   | 0.5 equiv.     | 77         |
| 7                 | AcOH 3 equiv.                                         | 3 equiv.   | 0.5 equiv.     | 0          |
| 8                 | PivOH 3 equiv.                                        | 3 equiv.   | 0.5 equiv.     | 97 (85)    |
| 9                 | 2-toluic acid 3 equiv.                                | 3 equiv.   | 0.5 equiv.     | 61         |
| 10                | 2-biphenylbenzoic acid 3 equiv.                       | 3 equiv.   | 0.5 equiv.     | 65         |
| 11                | $\text{C}_6\text{H}_{11}\text{CO}_2\text{H}$ 3 equiv. | 3 equiv.   | 0.5 equiv.     | 39         |
| 12                | PivOH 3 equiv.                                        | 1.2 equiv. | 0.5 equiv.     | 45         |
| 13                | PivOH 3 equiv.                                        | 2.5 equiv. | 0.5 equiv.     | 83         |
| 14 <sup>b</sup>   | PivOH 3 equiv.                                        | 3 equiv.   | 0.5 equiv.     | 41         |
| 15 <sup>c,d</sup> | PivOH 3 equiv.                                        | 3 equiv.   | -              | 64         |
| 16 <sup>c,e</sup> | PivOH 3 equiv.                                        | 3 equiv.   | -              | 78         |
| 17 <sup>c,f</sup> | PivOH 3 equiv.                                        | 3 equiv.   | -              | 86         |
| 18 <sup>f</sup>   | PivOH 3 equiv.                                        | 3 equiv.   | -              | 96 (91)    |
| 19 <sup>f,g</sup> | PivOH 3 equiv.                                        | 3 equiv.   | -              | 58         |

<sup>a</sup> Reaction conditions: **1a** (0.1 mmol), **2a**,  $[\text{Rh}(\text{COD})\text{Cl}]_2$  (0.005 mmol), additive,  $\text{MnO}_2$ , at 160 °C for 24 h. The number in the parenthesis refers to the isolated yield. <sup>b</sup> 2.5 mol% of  $[\text{Rh}(\text{COD})\text{Cl}]_2$  was used as the catalyst. <sup>c</sup> The reaction was carried out at 140 °C. <sup>d</sup> Toluene (1 mL) was used. <sup>e</sup> Toluene (0.4 mL) was used. <sup>f</sup> No solvent. <sup>g</sup> The reaction was carried out under an atmosphere of  $\text{N}_2$ .

## V. Kinetic Isotope Experiments:

In a 20 mL sealed tube containing **1** (48.7 mg, 0.2 mmol) or the deuterated starting material **1-d<sub>7</sub>** (49.7 mg, 0.2 mmol), *N*-benzylmaleimide (**2**) (112.3 mg, 0.6 mmol), [Rh(COD)Cl]<sub>2</sub> (4.9 mg, 0.01 mmol), pivalic acid (61.3 mg, 0.6 mmol) the reaction was stirred in an aerobic atmosphere at 140 °C. After stirring for 10 h, the mixture was diluted with ethyl acetate (5 mL) and filtered through a short pad of celite pad, which was then washed three times with ethyl acetate (3 × 3 mL). The combined filtrates were concentrated under reduced pressure and the crude mixture was analyzed by <sup>1</sup>H NMR to calculate the yield of the product and the remaining starting material. The experiment was conducted using parallel reaction conditions. Product yields were determined at 2 h intervals from 4 h to 12 h. In addition, the ratio of the two products was determined by <sup>1</sup>H NMR spectra of a mixture of **3c** and **1** or **3c-d<sub>4</sub>** and **1-d<sub>5</sub>** and the results are listed in the table below. Using these findings, the slope of the yield curve for both substrates was taken as  $k_H$  and  $k_D$  to determinate value KIE.  $KIE = k_H/k_D = 2.50$ .

1. Table S4: Reaction Values of Kinetic Isotopic Effect.

| Time    | $k_H$  | $k_D$  | $k_H/k_D$ |
|---------|--------|--------|-----------|
| 4 h     | 32.25  | 16.26  | 1.983     |
| 6 h     | 38.01  | 20.61  | 1.844     |
| 8 h     | 44.74  | 22.71  | 1.970     |
| 10 h    | 45.33  | 23.44  | 1.933     |
| 12 h    | 58.75  | 26.91  | 2.183     |
| Average | 43.816 | 21.986 | 1.9826    |

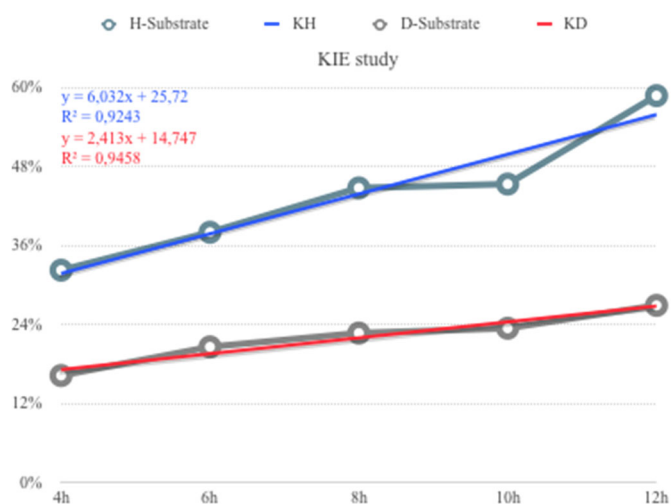

## 2. Deuterium Labelling Experiments:

Scheme S1: Deuterium labeling experiment using deuterated N-(2-(methylthio)phenyl) benzamide.

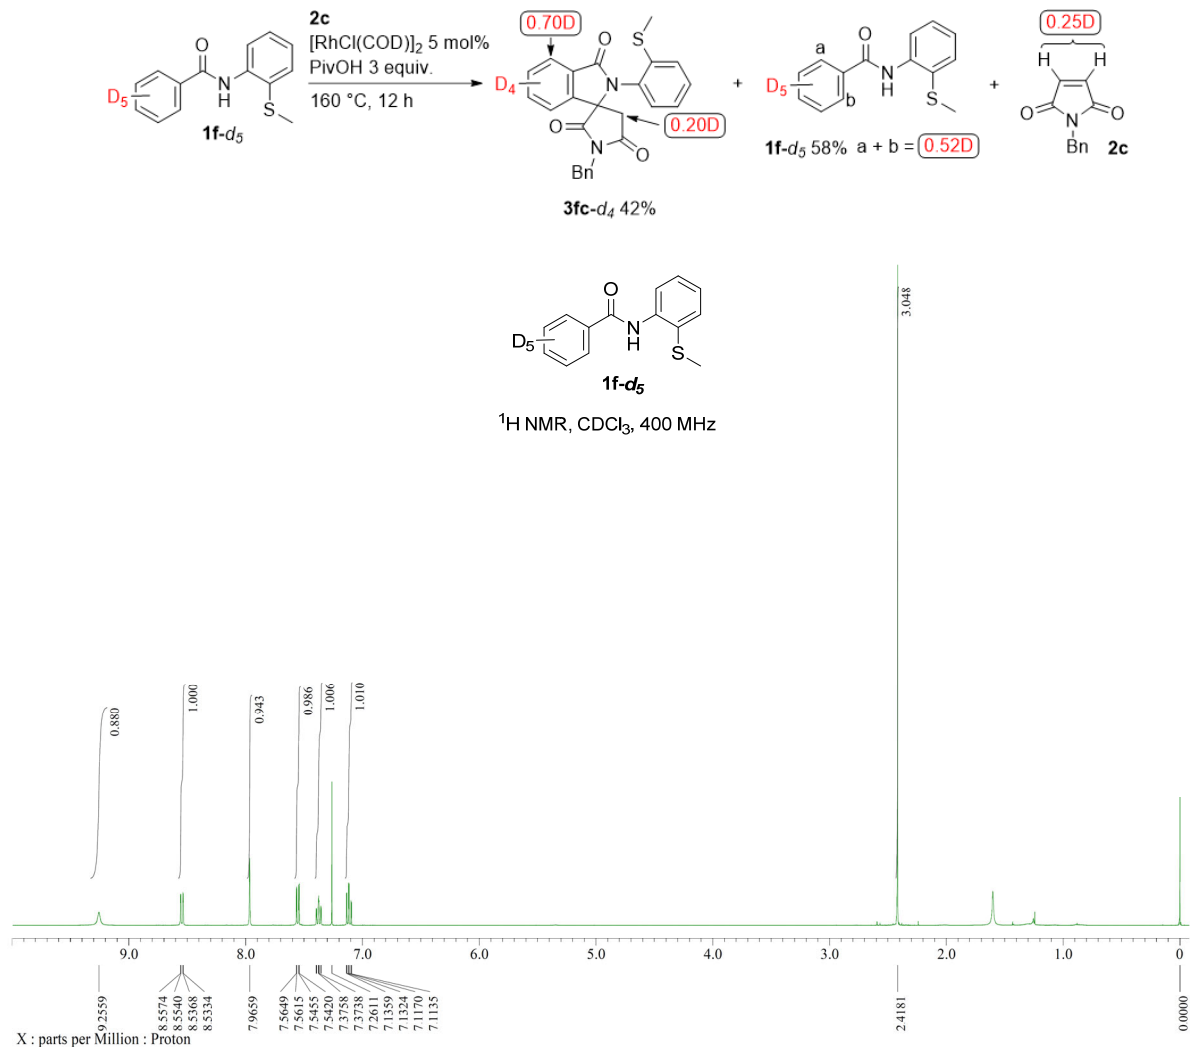

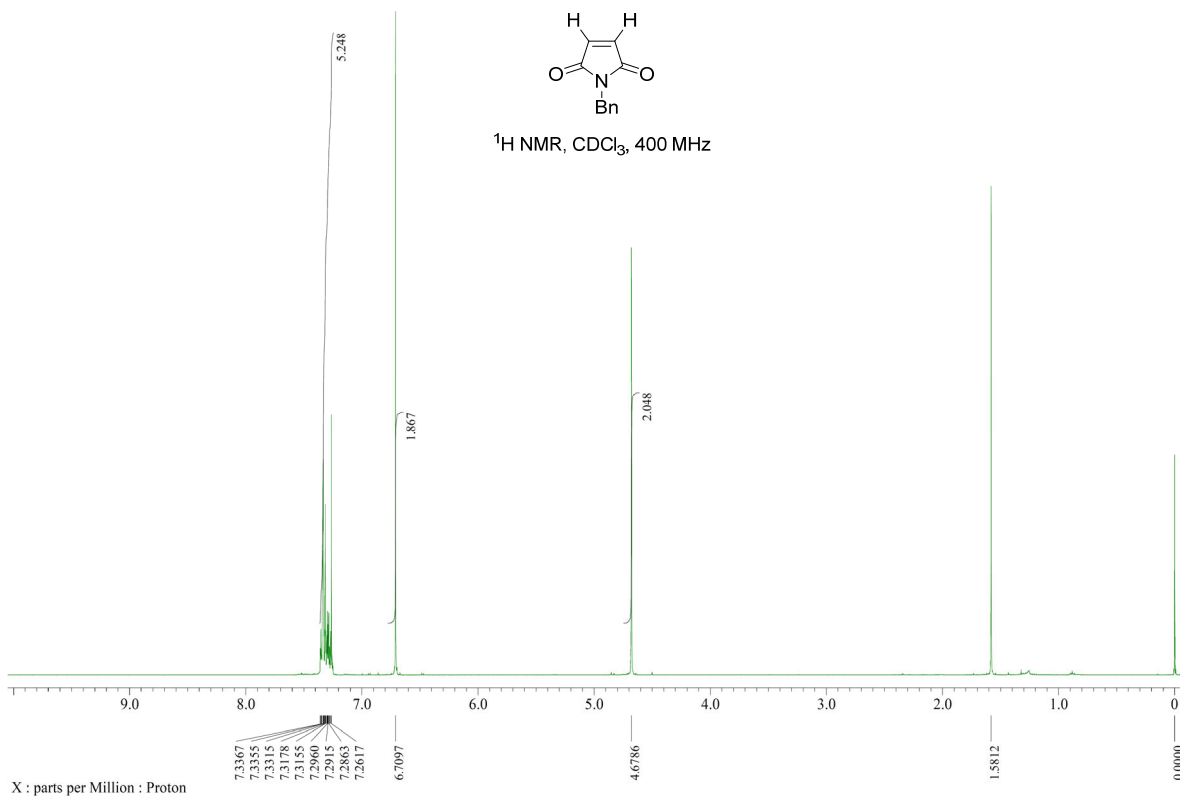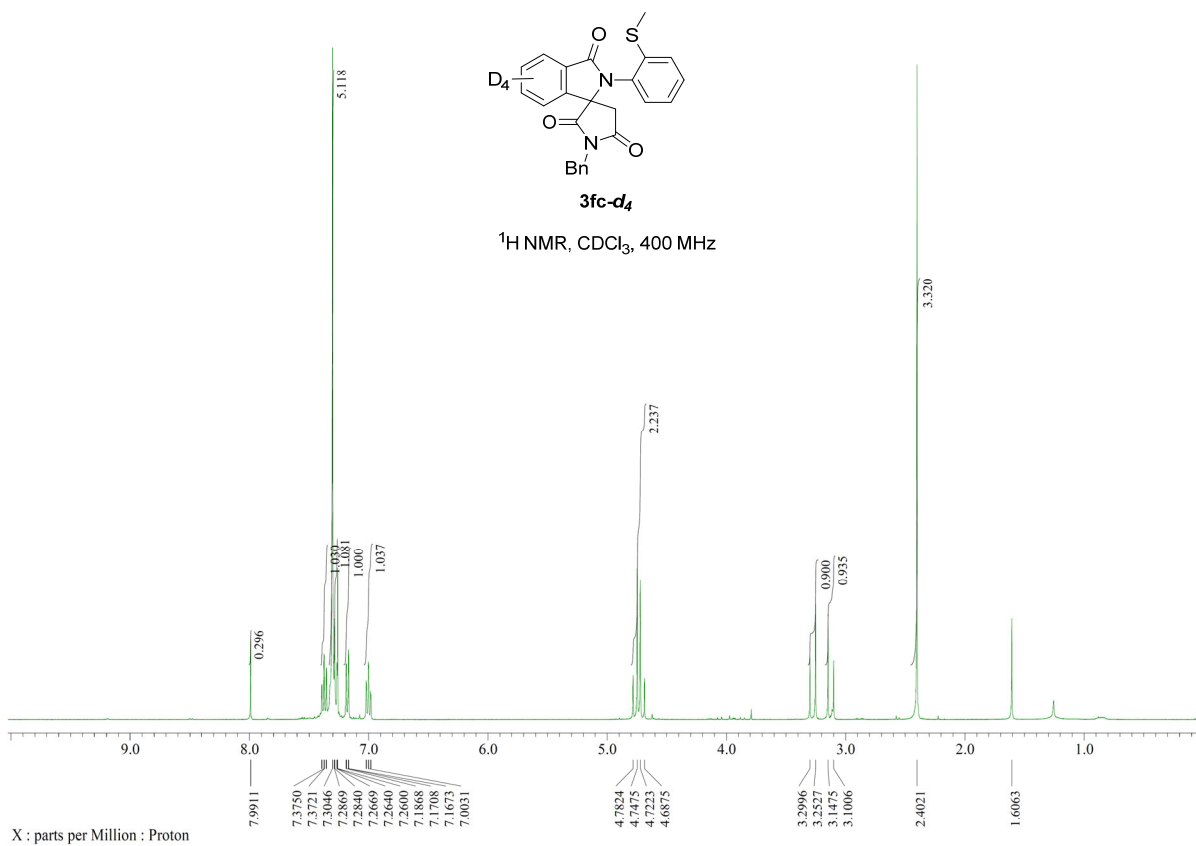

Scheme S2: Deuterium labeling experiment using deuterated *N*-benzylmaleimide.

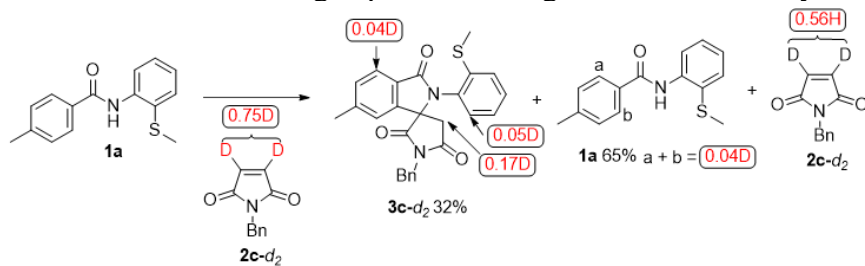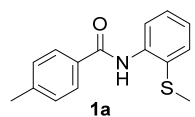

<sup>1</sup>H NMR, CDCl<sub>3</sub>, 400 MHz

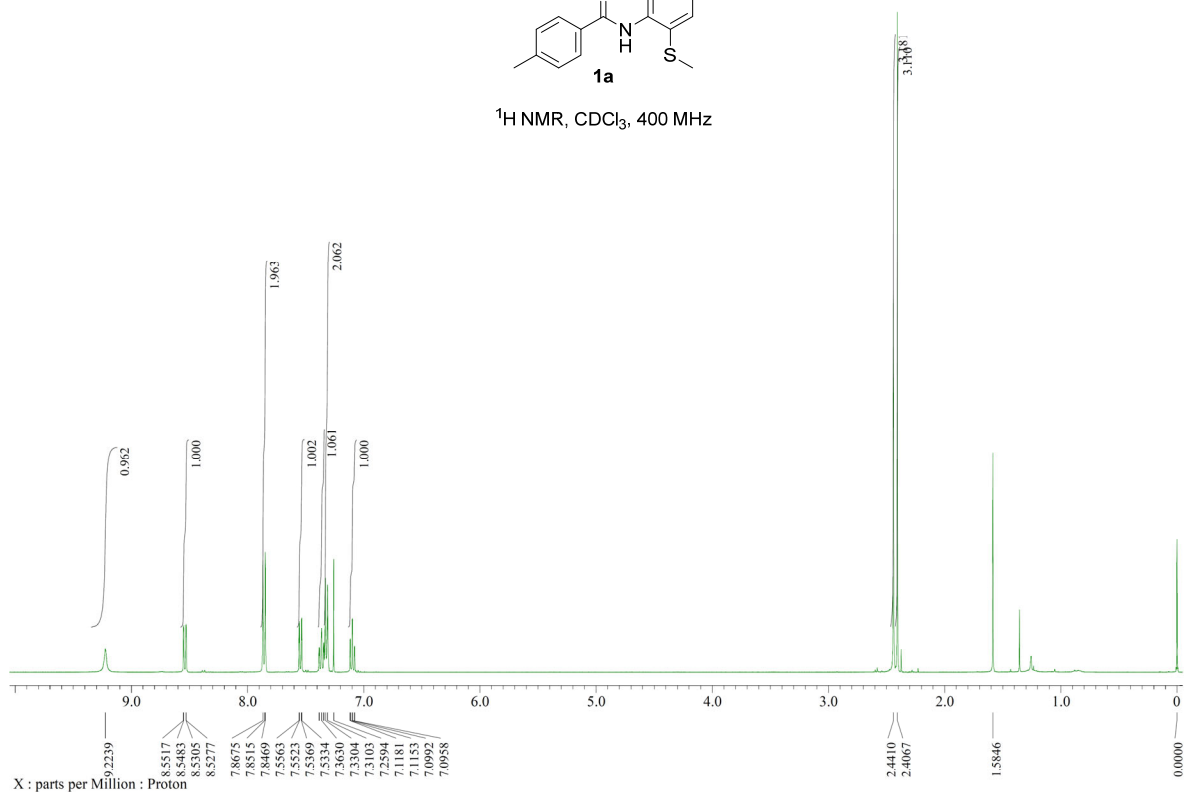

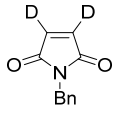

**2c-d<sub>2</sub>**

<sup>1</sup>H NMR, CDCl<sub>3</sub>, 400 MHz

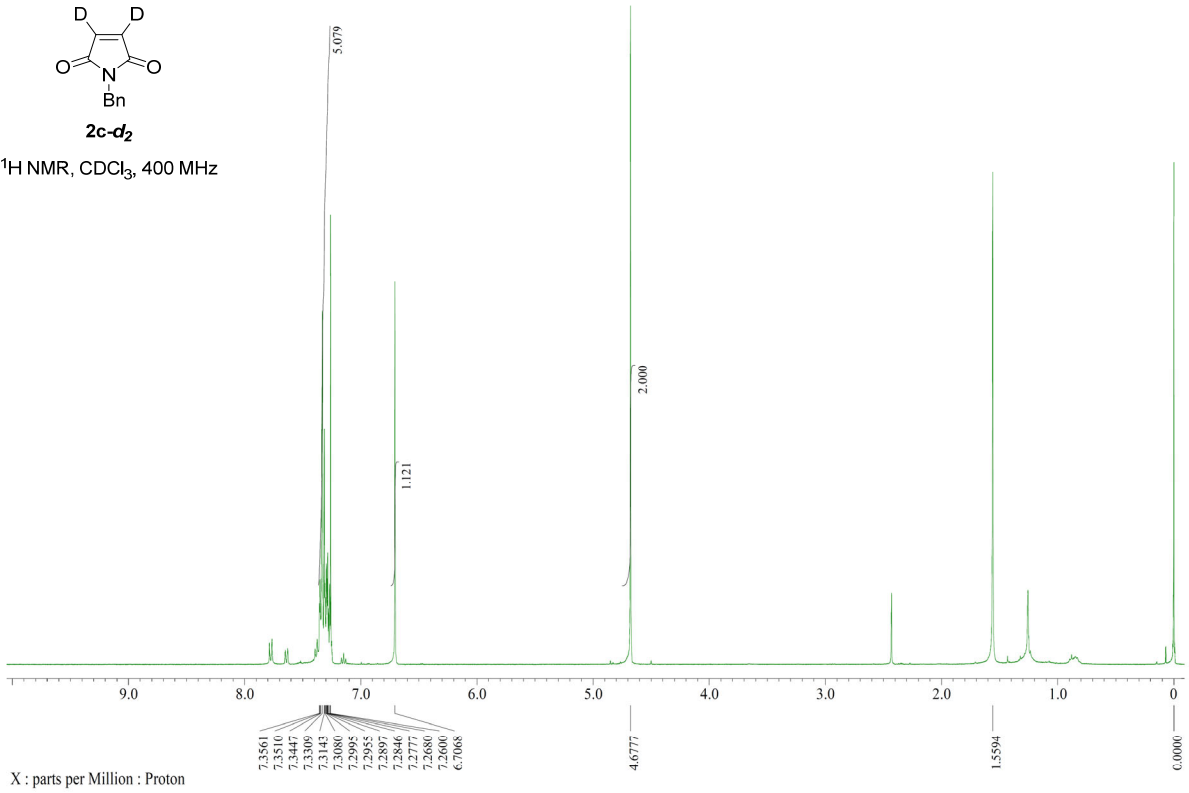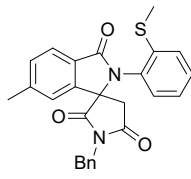

**3c-d<sub>2</sub>**

<sup>1</sup>H NMR, CDCl<sub>3</sub>, 400 MHz

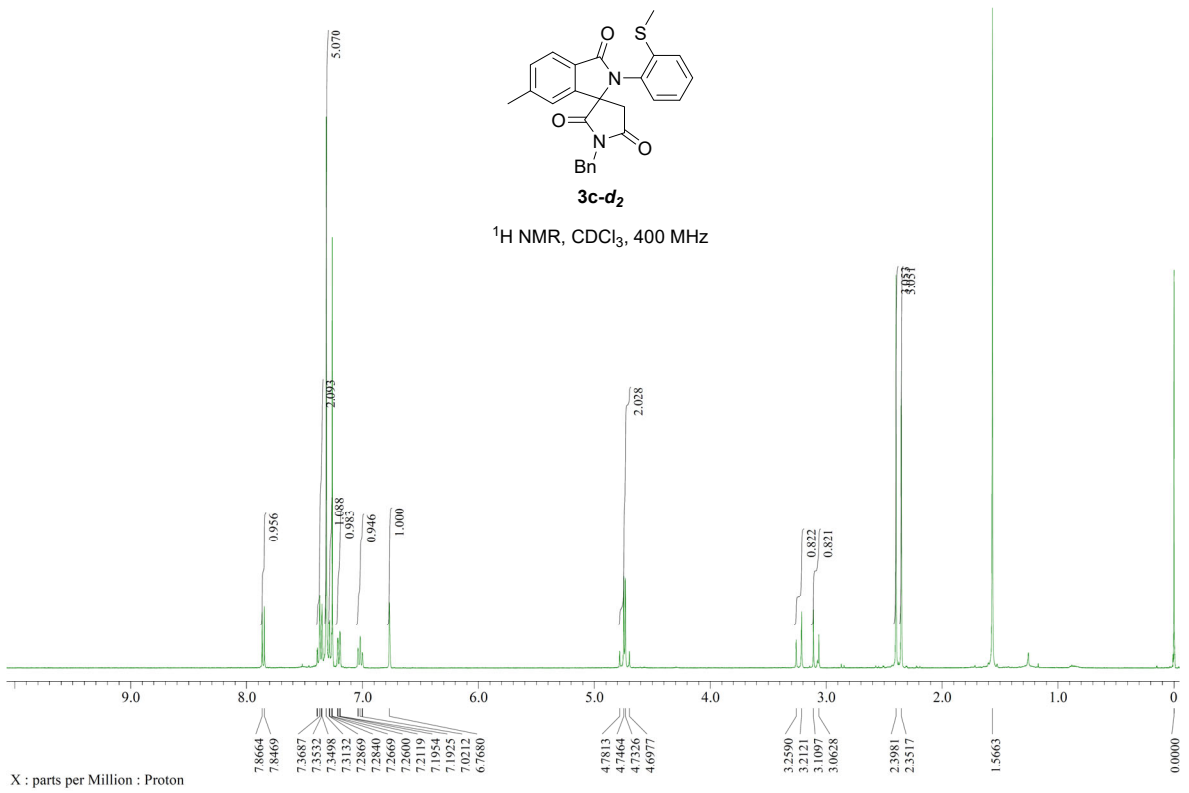

### Scheme S3: Deuterium labeling experiment using CD<sub>3</sub>CO<sub>2</sub>D.

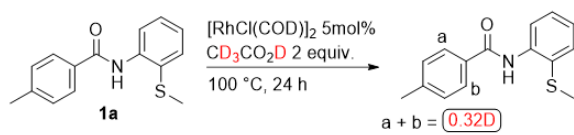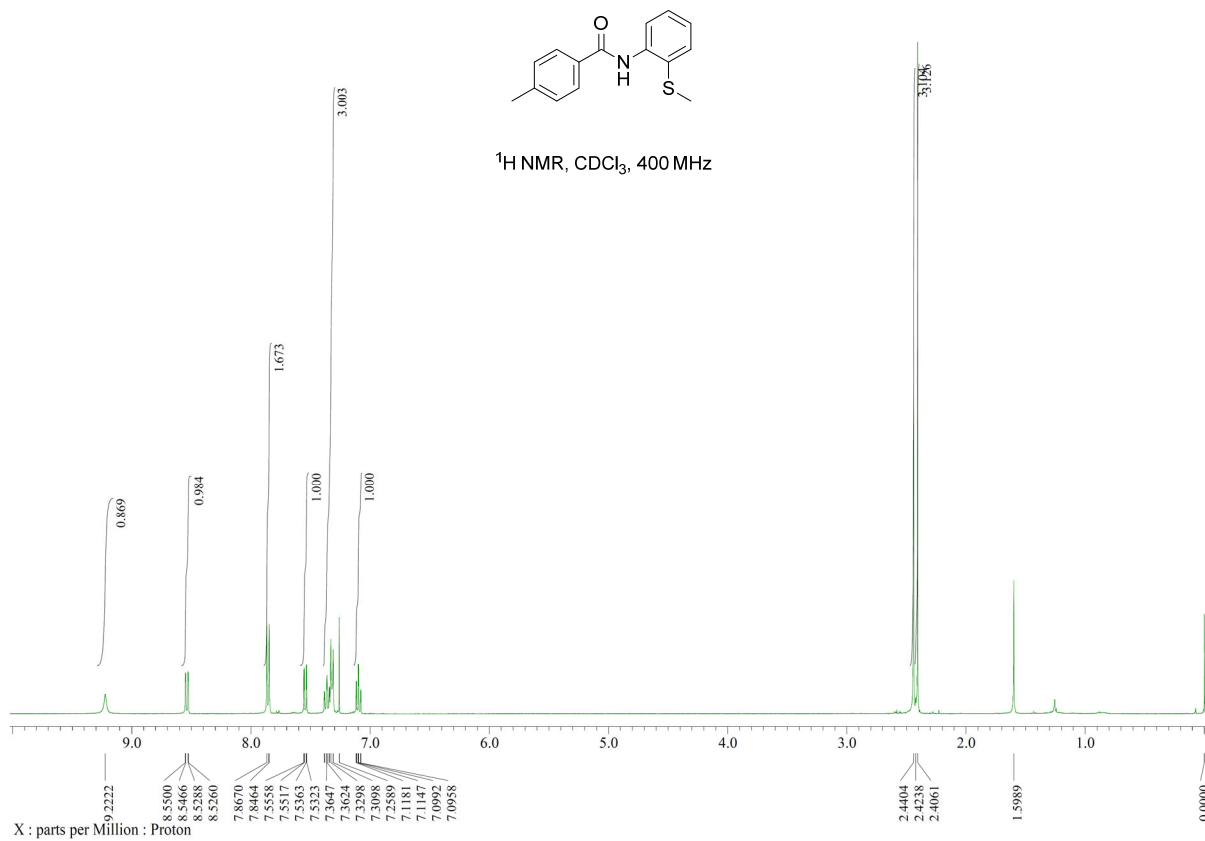



## VI. General Procedure for the Rh(I)-Catalyzed Reaction of Aromatic Amides with Maleimides:

After oven-drying a 20 mL screw-capped vial, 4-methyl-*N*-(2-(methylthio)phenyl)benzamide (**1a**) (25.7 mg, 0.1 mmol), *N*-methylmaleimide (**2a**; 33.3 mg, 0.3 mmol), [RhCl(COD)]<sub>2</sub> (2.5 mg, 0.005 mmol), and pivalic acid (30.6 mg, 0.3 mmol) were added. The mixture was stirred at 160 °C for 24 h and then allowed to cool to room temperature. The resulting mixture was filtered through a celite pad, and the organic phase was concentrated in vacuo. The residue was purified by column chromatography (hexane/Et<sub>2</sub>O = 2/8 as the eluent) to afford the desired product **3aa** (33.3 mg, 91%) as a pale-orange solid.

In the case of a 2 g scale synthesis of **3ac**: In an oven dried 40 mL seal tube, 4-methyl-*N*-(2-(methylthio)phenyl)benzamide (**1a**) (2 g, 7.77 mmol), *N*-benzylmaleimide (4.363 g, 23.31 mmol) (**2c**), [Rh(COD)Cl]<sub>2</sub> (191.6 mg, 0.388 mmol), and pivalic acid (2.380 g, 23.31 mmol) were added. The mixture was stirred at 160 °C for 24 h in an oil bath and then allowed to cool to room temperature. After completion of the reaction, the mixture was filtered through a celite pad, and the filtrate was then concentrated in vacuo. The residue was purified by column chromatography on (eluent: hexane/Et<sub>2</sub>O = 2/8) to afford the desired products **3c** (2.758 g, 81%) as a light yellow solid.

## VII. X-Ray Crystallographic Structure Analysis:

CCDC 1966217 contains the supplementary crystallographic data. X-Ray crystallographic structure analysis of 1',6-dimethyl-2-(2-(methylthio)phenyl)spiro[isoindoline-1,3'-pyrrolidine]-2',3,5'-trione (**3a**) was performed on Rigaku XtaLAB P200 imaging plate diffractometer with graphite monochromated Cu K $\alpha$  radiation. The data was collected at 150 K $\pm$ 1 K using  $\omega$  scan in the 2 $\theta$  range of 68.16°. A total of 21993 reflection were measured, of which 5543 were independent reflections (Rint = 0.0484). The structure was solved by direct methods (SIR92) and refined by the full matrix least-squares on F2 (Crystals). All nonhydrogen atoms were refined anisotropically and all hydrogen atoms were placed using riding model. The crystal data are as follows: (**3aa**\_CCDC 1966217):

### A. Crystal Data

|                         |                                                                                                                                                   |
|-------------------------|---------------------------------------------------------------------------------------------------------------------------------------------------|
| Empirical Formula       | C <sub>20</sub> H <sub>18</sub> N <sub>2</sub> O <sub>3</sub> S                                                                                   |
| Formula Weight          | 366.43                                                                                                                                            |
| Crystal Color, Habit    | Colorless crystal                                                                                                                                 |
| Crystal Description     | Plate                                                                                                                                             |
| Crystal Dimensions      | 0.05 x 0.5 x 0.6                                                                                                                                  |
| Crystal System          | triclinic                                                                                                                                         |
| Lattice Type            | Primitive                                                                                                                                         |
| Lattice Parameters      | a = 7.3302(6) Å<br>b = 7.6156(5) Å<br>c = 15.7854(10) Å<br>a = 85.339(5) °<br>b = 82.972(6) °<br>g = 83.511(6) °<br>V = 866.94(11) Å <sup>3</sup> |
| Space Group P-1 (#2)    |                                                                                                                                                   |
| Z value                 | 2                                                                                                                                                 |
| D <sub>calc</sub>       | 1.404 g/cm <sup>3</sup>                                                                                                                           |
| Radiation Type          | Cu K $\alpha$                                                                                                                                     |
| Radiation Wavelength    | 1.54184                                                                                                                                           |
| Measurement Temperature | 148°C                                                                                                                                             |
| F000                    | 384.00                                                                                                                                            |
| m(CuK $\alpha$ )        | 71.294 cm <sup>-1</sup>                                                                                                                           |

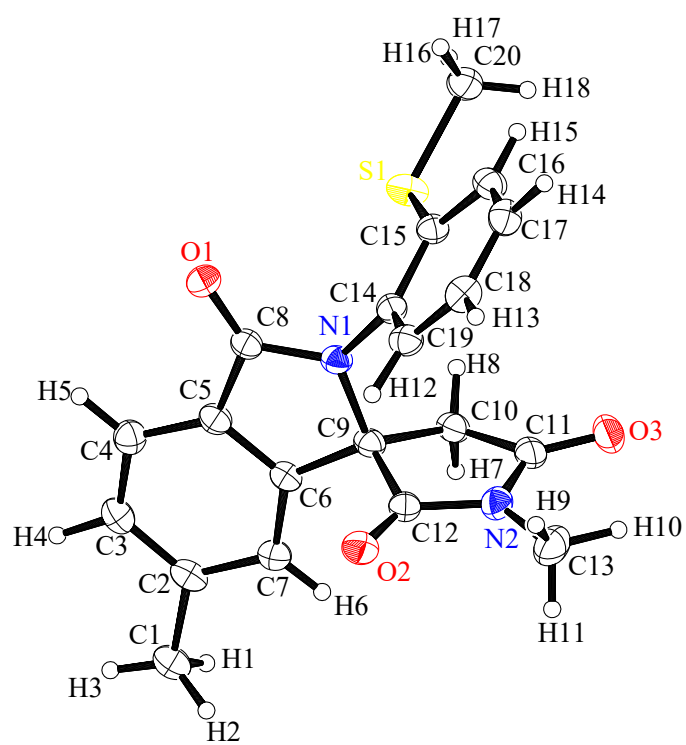

### 1. Table S5: Bond lengths (Å)

| atom | atom | distance | atom | atom | distance |
|------|------|----------|------|------|----------|
| S1   | C15  | 1.760(2) | C6   | C9   | 1.509(3) |
| S1   | C20  | 1.802(3) | C7   | H6   | 0.91(2)  |
| O1   | C8   | 1.222(3) | C9   | C10  | 1.536(3) |
| O2   | C12  | 1.202(3) | C9   | C12  | 1.547(3) |
| O3   | C11  | 1.207(3) | C10  | C11  | 1.506(4) |
| N1   | C8   | 1.378(3) | C10  | H7   | 0.94(3)  |
| N1   | C14  | 1.441(3) | C10  | H8   | 0.95(3)  |
| N1   | C9   | 1.480(3) | C13  | H9   | 0.93(5)  |
| N2   | C12  | 1.375(3) | C13  | H10  | 1.04(6)  |
| N2   | C11  | 1.387(4) | C13  | H11  | 0.94(5)  |
| N2   | C13  | 1.457(4) | C14  | C19  | 1.390(3) |
| C1   | C2   | 1.506(3) | C14  | C15  | 1.405(3) |
| C1   | H1   | 0.90(6)  | C15  | C16  | 1.395(3) |
| C1   | H2   | 0.98(5)  | C16  | C17  | 1.383(4) |
| C1   | H3   | 0.94(6)  | C16  | C15  | 0.92(3)  |
| C2   | C7   | 1.394(3) | C17  | C18  | 1.373(4) |
| C2   | C3   | 1.401(3) | C17  | H14  | 0.99(3)  |
| C3   | C4   | 1.384(3) | C18  | C19  | 1.391(3) |
| C3   | H4   | 1.03(3)  | C18  | H13  | 0.87(3)  |
| C4   | C5   | 1.391(3) | C19  | H12  | 1.00(3)  |
| C4   | H5   | 0.98(2)  | C20  | H16  | 1.01(4)  |
| C5   | C6   | 1.381(3) | C20  | H17  | 0.99(3)  |
| C5   | C8   | 1.488(3) | C20  | H18  | 0.94(3)  |

## 2. Table S6: Bond angles (°)

| atom | atom | atom | angle      | atom | atom | atom | angle      |
|------|------|------|------------|------|------|------|------------|
| C15  | S1   | C20  | 102.51(12) | C11  | C10  | H7   | 103.3(18)  |
| C8   | N1   | C14  | 124.34(17) | C9   | C10  | H7   | 110.1(18)  |
| C8   | N1   | C9   | 113.48(17) | C11  | C10  | H8   | 113.2(15)  |
| C14  | N1   | C9   | 121.67(17) | C9   | C10  | H8   | 112.0(15)  |
| C12  | N2   | C11  | 113.2(2)   | H7   | C10  | H8   | 113(2)     |
| C12  | N2   | C13  | 122.3(2)   | O3   | C11  | N2   | 124.6(3)   |
| C11  | N2   | C13  | 124.4(2)   | O3   | C11  | C10  | 127.3(3)   |
| C2   | C1   | H1   | 108(4)     | N2   | NC11 | C10  | 108.09(19) |
| C2   | C1   | H2   | 109(3)     | O2   | C12  | N2   | 125.5(2)   |
| H1   | C1   | H2   | 93(4)      | O2   | C12  | C9   | 126.7(2)   |
| C2   | C1   | H3   | 111(4)     | N2   | C12  | C9   | 107.6(2)   |
| H1   | C1   | H3   | 113(5)     | N2   | C13  | H9   | 111(3)     |
| H2   | C1   | H3   | 120(5)     | N2   | C13  | H10  | 107(3)     |
| C7   | C2   | C3   | 119.4(2)   | H9   | C13  | H10  | 110(4)     |
| C7   | C2   | C1   | 120.2(2)   | N2   | C13  | H11  | 114(2)     |
| C3   | C2   | C1   | 120.3(2)   | H9   | C13  | H11  | 111(4)     |
| C4   | C3   | C2   | 122.2(2)   | H10  | C13  | H11  | 103(4)     |
| C4   | C3   | H4   | 123.0(16)  | C19  | C14  | C15  | 120.42(19) |
| C2   | C3   | H4   | 114.8(16)  | C19  | C14  | N1   | 119.4(2)   |
| C3   | C4   | C5   | 117.6(2)   | C15  | C14  | N1   | 120.12(19) |
| C3   | C4   | H5   | 121.4(14)  | C16  | C15  | C14  | 118.5(2)   |
| C5   | C4   | H5   | 121.0(14)  | C16  | C15  | S1   | 123.49(19) |
| C6   | C5   | C4   | 120.9(2)   | C14  | C15  | S1   | 118.04(15) |
| C6   | C5   | C8   | 109.38(19) | C17  | C16  | C15  | 120.4(2)   |
| C4   | C5   | C8   | 129.6(2)   | C17  | C16  | H15  | 121.0(16)  |
| C5   | C6   | C7   | 121.5(2)   | C15  | C16  | H15  | 118.6(16)  |
| C5   | C6   | C9   | 110.00(18) | C18  | C17  | C16  | 121.1(2)   |
| C7   | C6   | C9   | 128.4(2)   | C18  | C17  | H14  | 120.3(19)  |
| C6   | C7   | C2   | 118.3(2)   | C16  | C17  | H14  | 118.6(19)  |
| C6   | C7   | H6   | 119.3(14)  | C17  | C18  | C19  | 119.6(2)   |
| C2   | C7   | H6   | 122.4(14)  | C17  | C18  | H13  | 121(2)     |
| O1   | C8   | N1   | 125.77(19) | C19  | C18  | H13  | 120(2)     |
| O1   | C8   | C5   | 128.7(2)   | C14  | C19  | C18  | 120.0(2)   |
| N1   | C8   | C5   | 105.57(18) | C14  | C19  | H12  | 118.6(14)  |
| N1   | C9   | C6   | 101.56(16) | C18  | C19  | H12  | 121.4(14)  |
| N1   | C9   | C10  | 113.17(18) | S1   | C20  | H16  | 106(2)     |
| C6   | C9   | C10  | 117.53(18) | S1   | C20  | H17  | 104.9(18)  |
| N1   | C9   | C12  | 108.57(17) | H16  | C20  | H17  | 112(3)     |
| C6   | C9   | C12  | 113.33(18) | S1   | C20  | H18  | 112.8(18)  |
| C10  | C9   | C12  | 102.76(18) | H16  | C20  | H18  | 112(2)     |
| C11  | C10  | C9   | 104.2(2)   | H17  | C20  | H18  | 108(3)     |

### VIII. Spectroscopic Data of Products:

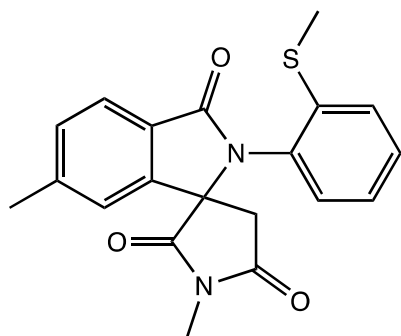

#### **1',6-dimethyl-2-(2-(methylthio)phenyl)spiro[isoindoline-1,3'-pyrrolidine]-2',3,5'-trione (3aa)**

91% yield.  $R_f = 0.13$  (hexane/EtOAc = 6/4). An orange solid. Mp = 193.5 °C

$^1\text{H NMR}$  ( $\text{CDCl}_3$ , 400 MHz):  $\delta$  7.88 (d,  $J = 7.8$  Hz, 1H), 7.39-7.44 (m, 2H), 7.29-7.32 (m, 2H), 7.17-7.21 (m, 1H), 7.07 (s, 1H), 3.29 (d,  $J = 18.9$  Hz, 1H), 3.14 (d,  $J = 18.9$  Hz, 1H), 3.10 (s, 3 H), 2.48 (s, 3H),

2.41 (s, 3H).

$^{13}\text{C NMR}$  ( $\text{CDCl}_3$ , 100 MHz):  $\delta$  175.1, 173.8, 167.5, 144.7, 144.4, 140.7, 131.8, 131.1, 130.4, 130.1, 128.2, 126.2, 126.0, 125.1, 120.5, 70.6, 36.9, 25.9, 22.2, 15.0.

**IR** (ATR) (neat,  $\text{v}/\text{cm}^{-1}$ ): 2971 w, 2926 w, 2360 w, 1712 s, 1616 w, 1435 w, 1356 m, 1219 w, 1204 w.

**MS**  $m/z$  (relative intensity, %): 366 ( $\text{M}^+$ , 21), 320 (23), 266 (28), 234 (10).

**HRMS** (EI)  $m/z$ : [ $\text{M}$ ] $^+$  Calcd for  $\text{C}_{21}\text{H}_{20}\text{N}_2\text{O}_3\text{S}$ : 366.1038; Found: 366.1189.

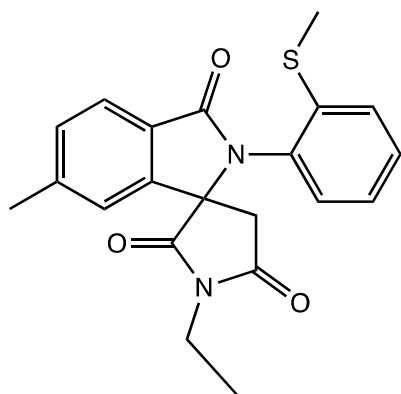

#### **1'-ethyl-6-methyl-2-(2-(methylthio)phenyl)spiro[isoindoline-1,3'-pyrrolidine]-2',3,5'-trione (3ab)**

96% yield.  $R_f = 0.26$  (hexane/EtOAc = 6/4). A pale yellow solid. Mp = 194.4 °C

$^1\text{H NMR}$  ( $\text{CDCl}_3$ , 400 MHz):  $\delta$  7.88 (d,  $J = 7.8$  Hz, 1H), 7.38-7.43 (m, 2H), 7.29-7.32 (m, 2H), 7.17 (td,  $J = 7.6$  Hz and 1.4 Hz, 1H), 7.06 (d,  $J = 0.5$  Hz, 1H), 3.65 (q,  $J = 7.2$  Hz, 2H), 3.26 (d,  $J = 18.7$  Hz, 1H), 3.10 (d,  $J = 18.7$  Hz, 1H), 2.47 (s, 3H), 2.41 (s, 3H), 1.17

(t,  $J = 7.2$  Hz, 3H)

$^{13}\text{C NMR}$  ( $\text{CDCl}_3$ , 100 MHz):  $\delta$  174.8, 173.5, 167.5, 144.8, 144.3, 140.6, 131.8, 131.1, 130.3, 130.0, 128.3, 126.0, 126.0, 125.1, 120.5, 70.3, 36.9, 34.8, 22.2, 14.9, 13.1.

**HRMS** (EI)  $m/z$ : [ $\text{M}$ ] $^+$  Calcd for  $\text{C}_{20}\text{H}_{18}\text{N}_2\text{O}_3\text{S}$ : 380.1195; Found: 380.1189.

#### **1'-benzyl-6-methyl-2-(2-(methylthio)phenyl)spiro[isoindoline-1,3'-pyrrolidine]-2',3,5'-trione (3ac)**

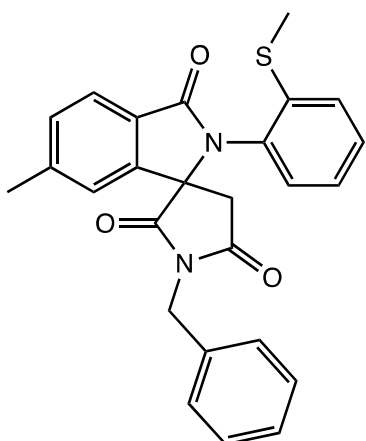

99% yield.  $R_f = 0.18$  (hexane/EtOAc = 6/4). A white solid.  $M_p = 212.3$  °C

$^1\text{H NMR}$  ( $\text{CDCl}_3$ , 400 MHz):  $\delta$  7.85 (d,  $J = 7.8$  Hz, 1H), 7.34-7.39 (m, 2H), 7.19-7.39 (c, 7H), 7.01 (dd,  $J = 7.6$  Hz and 1.4 Hz, 1H), 6.77 (t,  $J = 1.4$  Hz, 1H), 4.76 (d,  $J = 12.2$  Hz, 1H), 4.71 (d,  $J = 12.2$  Hz, 1H), 3.23 (d,  $J = 18.7$  Hz, 1H), 3.09 (d,  $J = 18.7$  Hz, 1H), 2.39 (s, 3H), 2.34 (s, 3H).

$^{13}\text{C NMR}$  ( $\text{CDCl}_3$ , 100 MHz):  $\delta$  178.6, 173.2, 167.5, 144.7, 144.3, 140.5, 135.2, 131.7, 131.0, 130.2, 130.1, 128.9, 128.9, 128.5, 128.1, 126.0, 125.9, 125.1, 120.5, 70.3, 43.3, 36.9, 22.0, 15.0.

**IR** (ATR) (neat,  $\text{v}/\text{cm}^{-1}$ ): 3340 w, 3033 w, 2921 w, 2360 w, 2338 w, 1713

s, 1390 m, 1352 m, 1173 m, 756 w, 702 m.

**MS**  $m/z$  (relative intensity, %): 442 ( $M^+$ , 29), 396 (27), 395 (100), 266 (32), 91(11).

**HRMS** (EI)  $m/z$ : [ $M$ ] $^+$  Calcd for  $\text{C}_{26}\text{H}_{22}\text{N}_2\text{O}_3\text{S}$ : 442.1351; Found: 442.1351.

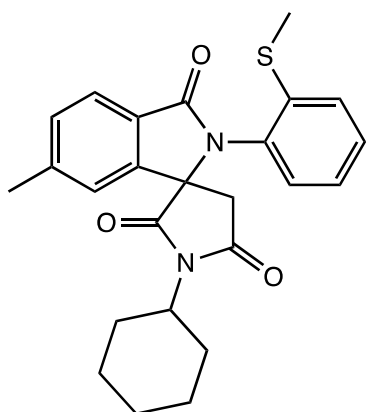

**1'-cyclohexyl-6-methyl-2-(2-(methylthio)phenyl)spiro[indene-1,3'-pyrrolidine]-2',3,5'(2H)-trione (3ad)**

80% yield.  $R_f = 0.23$  (hexane/ $\text{Et}_2\text{O} = 3/7$ ). A white solid.  $M_p = 169.9$  °C

$^1\text{H NMR}$  ( $\text{CDCl}_3$ , 400 MHz):  $\delta$  7.87 (d,  $J = 8.0$  Hz, 1H), 7.37-7.43 (m, 2H), 7.15-7.20 (m, 1H), 7.15-7.20 (m, 1H), 7.03 (d,  $J = 1.1$  Hz, 1H), 3.95-4.95 (m, 1H), 3.20 (d,  $J = 18.5$  Hz, 1H), 3.06 (d,  $J = 18.5$  Hz, 1H), 2.47 (s, 3H), 2.41 (s, 3H), 2.01-2.24 (m, 2H), 1.82-1.84 (m, 2H), 1.54-1.67 (m, 3H), 1.17-1.37 (m, 3H).

$^{13}\text{C NMR}$  ( $\text{CDCl}_3$ , 100 MHz):  $\delta$  174.9, 173.8, 167.6, 145.1, 144.3, 140.7, 132.0, 131.0, 130.3, 130.0, 128.4, 126.1, 126.0, 125.1, 120.3, 70.0, 52.8, 36.7, 29.1, 28.9, 25.9, 25.8, 25.0, 22.2, 15.0.

**IR** (ATR) (neat,  $\text{v}/\text{cm}^{-1}$ ): 2930 w, 2853 w, 2360 w, 1710 s, 1351 m, 1199 w, 1054 w, 757 w.

**MS**  $m/z$  (relative intensity, %): 434 ( $M^+$ , 22), 388 (26), 387 (100), 266 (45), 234 (11).

**HRMS** (EI)  $m/z$ : [ $M$ ] $^+$  Calcd for  $\text{C}_{25}\text{H}_{26}\text{N}_2\text{O}_3\text{S}$ : 434.1664; Found: 434.1665.

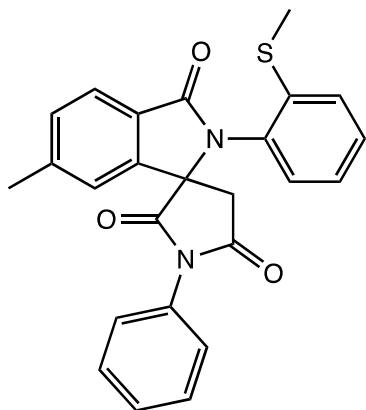

**6-methyl-2-(2-(methylthio)phenyl)-1'-phenylspiro[isoindoline-1,3'-pyrrolidine]-2',3,5'-trione (3ae)**

65% yield.  $R_f = 0.23$  (hexane/EtOAc = 6/4). A golden solid. Mp = 103.1 °C

$^1\text{H NMR}$  ( $\text{CDCl}_3$ , 400 MHz):  $\delta$  7.91 (d,  $J = 8.0$  Hz, 1H), 7.40-7.51 (c, 7H), 7.32-7.35 (m, 1H), 7.20-7.26 (c, 2H), 3.48 (d,  $J = 18.8$  Hz), 3.30 (d,  $J = 18.8$  Hz), 2.51 (s, 3H), 2.44 (s, 3H).

$^{13}\text{C NMR}$  ( $\text{CDCl}_3$ , 100 MHz):  $\delta$  174.0, 172.7, 167.6, 144.7, 144.5, 140.78, 131.83, 131.43, 131.28, 130.48, 130.23, 129.49, 129.31, 128.31, 126.3, 126.2, 126.1, 125.3, 120.5, 70.5, 37.1, 22.2, 15.0.

**HRMS** (EI)  $m/z$ :  $[\text{M}]^+$  Calcd for  $\text{C}_{25}\text{H}_{20}\text{N}_2\text{O}_3\text{S}$ : 428.1195; Found: 428.1190.

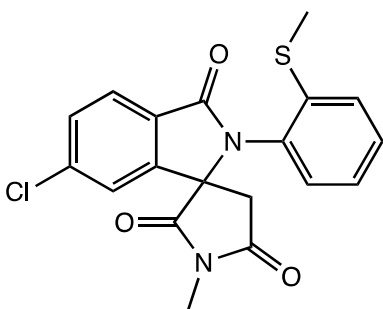

**6-chloro-1'-methyl-2-(2-(methylthio)phenyl)spiro[isoindoline-1,3'-pyrrolidine]-2',3,5'-trione (3ba)**

72% yield.  $R_f = 0.33$  (hexane/Et<sub>2</sub>O = 3/7). A yellow solid. Mp = 213.7 °C

$^1\text{H NMR}$  ( $\text{CDCl}_3$ , 400 MHz):  $\delta$  7.93 (dd,  $J = 8.2$  Hz and 0.8 Hz, 1H), 7.58 (dd,  $J = 8.0$  Hz and 1.6 Hz, 1H), 7.43 (td,  $J = 8.0$  Hz and 1.6 Hz, 1H), 7.27-7.30 (c, 3H), 7.19 (td,  $J = 7.6$  Hz and 1.4 Hz, 1H), 3.31 (d,  $J = 18.8$  Hz, 1H), 3.14 (d,  $J = 18.8$  Hz, 1H), 3.10 (s, 3H), 2.42 (s, 3H).

$J = 18.8$  Hz, 1H), 3.14 (d,  $J = 18.8$  Hz, 1H), 3.10 (s, 3H), 2.42 (s, 3H).

$^{13}\text{C NMR}$  ( $\text{CDCl}_3$ , 100 MHz):  $\delta$  174.33, 173.1, 166.3, 145.7, 140.6, 139.6, 131.5, 130.8, 130.6, 129.9, 129.4, 126.5, 126.3, 120.869, 70.4, 36.7, 26.0, 15.0.

**HRMS** (EI)  $m/z$ :  $[\text{M}]^+$  Calcd for  $\text{C}_{19}\text{H}_{15}\text{ClN}_2\text{O}_3\text{S}$ : 386.0492; Found: 386.0492.

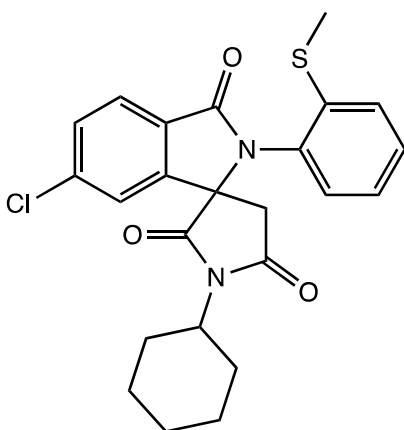

**6-chloro-1'-cyclohexyl-2-(2-(methylthio)phenyl)spiro[isoindoline-1,3'-pyrrolidine]-2',3,5'-trione (3bd)**

86% yield.  $R_f = 0.43$  (hexane/Et<sub>2</sub>O = 3/7). A light yellow solid. Mp = 211.1 °C

$^1\text{H NMR}$  ( $\text{CDCl}_3$ , 400 MHz):  $\delta$  7.93 (dd,  $J = 8.0$  Hz and 0.5 Hz, 1H), 7.57 (dd,  $J = 7.7$  Hz and 1.6 Hz, 1H), 7.42 (td,  $J = 7.7$  Hz and 1.6 Hz, 1H), 7.25-7.32 (c, 3H), 7.18 (td,  $J = 7.7$  Hz and 1.4 Hz, 1H), 4.03-



4.95 (m, 1H), 3.22 (d,  $J = 18.8$  Hz, 1H), 3.07 (d,  $J = 18.8$  Hz, 1H), 2.42 (s, 3H), 2.00-2.19 (m, 2H), 1.80-1.90 (c, 2H), 1.51-1.70 (c, 3H), 1.17-1.37 (m, 3H).

$^{13}\text{C}$  NMR ( $\text{CDCl}_3$ , 100 MHz):  $\delta$  174.2, 173.1, 166.4, 146.0, 140.5, 139.5, 131.4, 130.6, 130.5, 129.8, 129.5, 126.5, 126.2, 126.1, 120.6, 69.7, 53.0, 36.4, 29.0, 28.8, 25.8, 25.8, 25.0, 15.0.

HRMS (EI)  $m/z$ :  $[\text{M}]^+$  Calcd for  $\text{C}_{24}\text{H}_{23}\text{N}_2\text{O}_3\text{S}$ : 454.1118; Found: 454.1119.

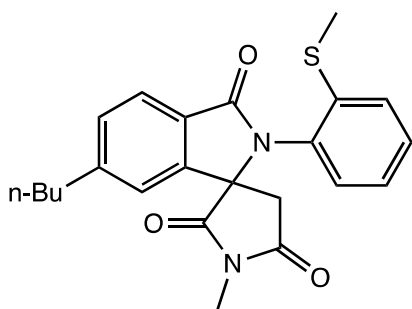

**6-butyl-1'-methyl-2-(2-(methylthio)phenyl)spiro[indoline-1,3'-pyrrolidine]-2',3,5'-trione (3ca)**

92% yield.  $R_f = 0.32$  (hexane/ $\text{Et}_2\text{O} = 3/7$ ). An orange solid. Mp = 100.5  $^\circ\text{C}$

$^1\text{H}$  NMR ( $\text{CDCl}_3$ , 400 MHz):  $\delta$  7.89 (d,  $J = 8.0$  Hz, 1H), 7.39-7.44 (m, 2H), 7.29-7.32 (m, 2H), 7.16-7.21 (m, 1H), 7.05 (d,  $J = 0.5$  Hz, 1H), 3.29 (d,  $J = 18.3$  Hz, 1H), 3.13 (d,  $J = 18.3$  Hz, 1H), 3.09 (s, 3H),

2.69-2.73 (m, 2H), 2.41 (s, 3H), 1.59-1.66 (m, 2H), 1.36-1.41 (m, 2H), 0.92 (t,  $J = 7.3$  Hz, 3H).

$^{13}\text{C}$  NMR ( $\text{CDCl}_3$ , 100.53 MHz):  $\delta$  175.11, 173.8, 167.6, 149.4, 144.6, 140.7, 131.9, 130.5, 130.3, 130.1, 128.4, 126.1, 126.1, 125.1, 119.8, 70.6, 37.0, 36.3, 33.7, 25.9, 22.6, 15.0, 14.0.

HRMS (EI)  $m/z$ :  $[\text{M}]^+$  Calcd for  $\text{C}_{23}\text{H}_{24}\text{N}_2\text{O}_3\text{S}$ : 408.1508; Found: 406.1509.

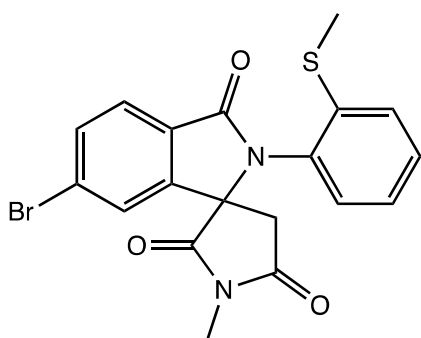

**6-bromo-1'-methyl-2-(2-(methylthio)phenyl)spiro[indoline-1,3'-pyrrolidine]-2',3,5'-trione (3da)**

84% yield.  $R_f = 0.27$  (hexane/ $\text{Et}_2\text{O} = 3/7$ ). A light orange solid. Mp = 225.1  $^\circ\text{C}$

$^1\text{H}$  NMR ( $\text{CDCl}_3$ , 400 MHz):  $\delta$  7.86 (d,  $J = 8.2$  Hz, 1H), 7.74 (dd,  $J = 8.2$  Hz and 1.5 Hz, 1H), 7.41-7.45 (m, 2H), 7.26-7.31 (m, 2H), 7.18 (td,  $J = 7.6$  Hz and 1.4 Hz, 1H), 3.30 (d,  $J = 18.8$  Hz, 1H), 3.15

(d,  $J = 18.8$  Hz, 1H), 3.10 (s, 3H), 2.42 (s, 3H).

$^{13}\text{C}$  NMR ( $\text{CDCl}_3$ , 100 MHz):  $\delta$  174.3, 173.2, 166.4, 145.8, 140.5, 133.6, 131.2, 130.6, 129.8, 129.8, 127.9, 126.7, 126.2, 126.1, 123.8, 70.3, 36.6, 26.0, 14.9.

HRMS (EI)  $m/z$ :  $[\text{M}]^+$  Calcd for  $\text{C}_{19}\text{H}_{15}\text{BrN}_2\text{O}_3\text{S}$ : 429.9987; Found: 429.9980

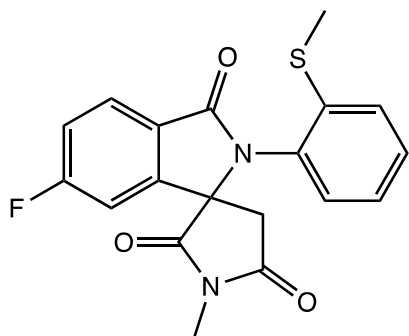

**6-fluoro-1'-methyl-2-(2-(methylthio)phenyl)spiro[indoline-1,3'-pyrrolidine]-2',3,5'-trione (3ea)**

91% yield.  $R_f = 0.23$  (hexane/Et<sub>2</sub>O = 3/7). A white solid. Mp = 210.1 °C

**<sup>1</sup>H NMR** (CDCl<sub>3</sub>, 400 MHz):  $\delta$  7.99 (dd,  $J = 8.2$  Hz and 4.8 Hz, 1H), 7.43 (td,  $J = 7.7$  Hz and 1.3 Hz, 1H), 7.24-7.32 (m, 3H), 7.19 (td,  $J = 7.5$  Hz and 1.1 Hz, 1H), 6.99 (dd,  $J = 7.5$  Hz and 2.0 Hz, 1H), 3.31

(d,  $J = 18.8$  Hz, 1H), 3.14 (d,  $J = 18.8$  Hz, 1H), 3.09 (s, 3H), 2.42 (s, 3H).

**<sup>13</sup>C NMR** (CDCl<sub>3</sub>, 100 MHz):  $\delta$  174.3, 173.2, 166.3, 165.9 ( $J = 253$  Hz), 146.4 (d,  $J = 9.6$  Hz), 140.5, 131.4, 130.6, 129.9, 127.5 (d,  $J = 9.6$  Hz), 126.9, 126.1 (d,  $J = 15.3$  Hz), 117.97 (d,  $J = 23.0$  Hz), 108.04 (d,  $J = 24.9$  Hz), 70.3, 36.7, 26.0, 14.9.

**IR** (ATR) (neat,  $\nu/\text{cm}^{-1}$ ): 3064 w, 2925 w, 2855 w, 1711 s, 1606 m, 1469 m, 1435 m, 1355 m, 1240 m, 1140 w, 1049 w, 757 w.

**MS**  $m/z$  (relative intensity, %): 370 (M<sup>+</sup>, 29), 324 (20), 323 (100), 270 (40), 238 (13).

**HRMS** (EI)  $m/z$ : [M]<sup>+</sup> Calcd for C<sub>19</sub>H<sub>15</sub>FN<sub>2</sub>O<sub>3</sub>S: 370.0787; Found: 370.0783.

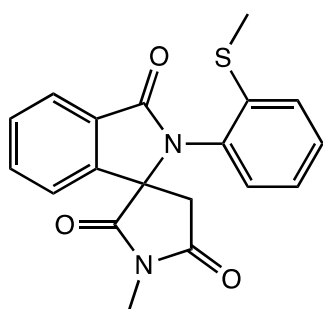

**1'-methyl-2-(2-(methylthio)phenyl)spiro[indoline-1,3'-pyrrolidine]-2',3,5'-trione (3fa)**

64% yield.  $R_f = 0.20$  (hexane/Et<sub>2</sub>O = 3/7). A ivory solid. Mp = 229.3 °C

**<sup>1</sup>H NMR** (CDCl<sub>3</sub>, 400 MHz):  $\delta$  7.99-8.02 (m, 1H), 7.58-7.66 (m, 2H), 7.41-7.45 (m, 1H), 7.28-7.32 (m, 3H), 7.19 (td,  $J = 7.6$  Hz and 1.4 Hz, 1H), 3.31

(d,  $J = 18.7$  Hz, 1H), 3.15 (d,  $J = 18.7$  Hz, 1H), 3.09 (s, 3H), 2.41 (s, 3H).

**<sup>13</sup>C NMR** (CDCl<sub>3</sub>, 100 MHz):  $\delta$  174.9, 173.7, 167.5, 144.3, 140.6, 133.3, 131.7, 130.8, 130.4, 130.2, 130.0, 126.2, 126.1, 125.3, 120.2, 70.8, 36.9, 25.9, 15.0.

**HRMS** (EI)  $m/z$ : [M]<sup>+</sup> Calcd for C<sub>19</sub>H<sub>16</sub>N<sub>2</sub>O<sub>3</sub>S: 352.0882; Found: 352.0878.

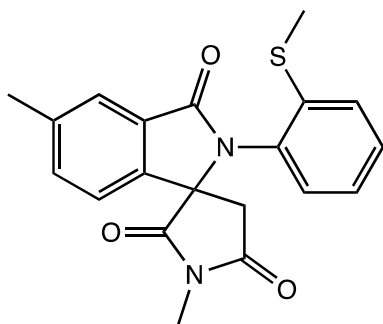

**1',5-dimethyl-2-(2-(methylthio)phenyl)spiro[isoindoline-1,3'-pyrrolidine]-2',3,5'-trione (3ga)**

94% yield.  $R_f = 0.22$  (hexane/EtOAc = 7/3). A golden solid. Mp = 180.3 °C

$^1\text{H NMR}$  ( $\text{CDCl}_3$ , 400 MHz):  $\delta$  7.81 (q,  $J = 0.7$  Hz, 1H), 7.40-7.46 (m, 2H), 7.29-7.32 (m, 2H), 7.17-7.21 (m, 2H), 3.27 (d,  $J = 18.9$  Hz, 1H), 3.12 (d,  $J = 18.9$  Hz, 1H), 3.08 (s, 3H), 2.48 (s, 3H), 2.42 (s, 3H).

$^{13}\text{C NMR}$  ( $\text{CDCl}_3$ , 100 MHz):  $\delta$  175.1, 173.7, 167.7, 141.6, 140.6, 134.2, 131.9, 130.9, 130.384, 130.0, 126.2, 126.1, 125.5, 119.9, 70.6, 36.9, 25.8, 21.6, 15.0.

**HRMS** (EI)  $m/z$ :  $[\text{M}]^+$  Calcd for  $\text{C}_{20}\text{H}_{18}\text{N}_2\text{O}_3\text{S}$ : 366.1038; Found: 366.1337.

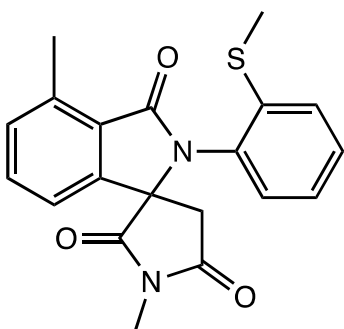

**1',4-dimethyl-2-(2-(methylthio)phenyl)spiro[isoindoline-1,3'-pyrrolidine]-2',3,5'-trione (3ha)**

60% yield.  $R_f = 0.32$  (hexane/Et<sub>2</sub>O = 3/7). A light orange solid. Mp = 158.7 °C

$^1\text{H NMR}$  ( $\text{CDCl}_3$ , 400 MHz):  $\delta$  7.49 (t,  $J = 7.5$  Hz, 1H), 7.42 (td,  $J = 7.8$  Hz, and 1.4 Hz, 1H), 7.27-7.34 (m, 3), 7.18 (td,  $J = 7.8$  Hz and 1.3 Hz, 1), 7.08 (d,  $J = 7.8$  Hz, 1H), 3.32 (d,  $J = 18.8$  Hz, 1H), 3.13 (d,  $J = 18.8$  Hz,

1H), 3.08 (s, 3H), 2.78 (s, 3H), 2.40 (s, 3H).

$^{13}\text{C NMR}$  ( $\text{CDCl}_3$ , 100 MHz):  $\delta$  175.2, 173.8, 168.2, 144.9, 140.7, 139.7, 132.7, 132.2, 132.0, 130.3, 130.2, 127.8, 126.1, 125.8, 117.4, 70.1, 37.2, 25.8, 17.4, 14.9.

**HRMS** (EI)  $m/z$ :  $[\text{M}]^+$  Calcd for  $\text{C}_{20}\text{H}_{18}\text{N}_2\text{O}_3\text{S}$ : 366.1038; Found: 406.1323.

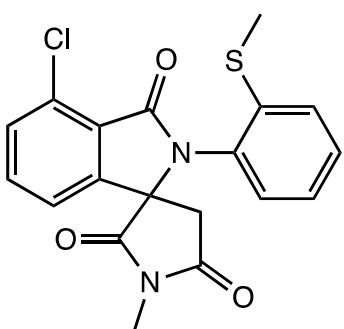

**4-chloro-1'-methyl-2-(2-(methylthio)phenyl)spiro[iso-indoline-1,3'-pyrrolidine]-2',3,5'-trione (3ia)**

81% yield.  $R_f = 0.19$  (hexane/Et<sub>2</sub>O = 2/8). A beige solid. Mp = 146.3 °C

$^1\text{H NMR}$  ( $\text{CDCl}_3$ , 400 MHz):  $\delta$  7.54 (t,  $J = 2.7$  Hz, 2H), 7.41-7.45 (m, 1H), 7.28-7.31 (m, 2H), 7.17-7.21 (m, 2H), 3.33 (d,  $J = 18.3$  Hz, 1H), 3.12 (d,  $J = 18.7$  Hz, 1H), 3.08 (s, 3H), 2.42 (s, 3H).

$^{13}\text{C NMR}$  ( $\text{CDCl}_3$ , 100 MHz):  $\delta$  174.5, 173.4, 164.9, 146.5, 140.6, 133.88, 133.3, 131.9, 131.5, 130.6, 130.1, 127.0, 126.2, 126.1, 118.7, 69.7, 37.0, 26.0, 15.0.

**HRMS** (EI)  $m/z$ :  $[\text{M}]^+$  Calcd for  $\text{C}_{19}\text{H}_{15}\text{ClN}_2\text{O}_3\text{S}$ : 386.0492; Found: 386.0487.

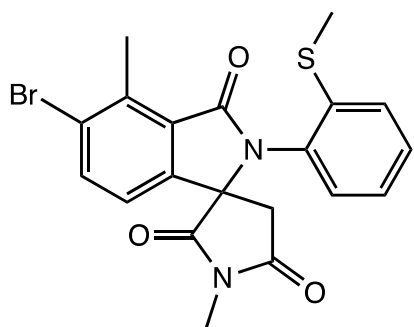

**5-bromo-1',4-dimethyl-2-(2-(methylthio)phenyl)spiro[isoindoline-1,3'-pyrrolidine]-2',3,5'-trione (3ja)**

74% yield.  $R_f = 0.35$  (hexane/ Et<sub>2</sub>O = 3/7). A light orange solid. Mp = 238.4 °C

<sup>1</sup>H NMR (CDCl<sub>3</sub>, 400 MHz): δ 7.49 (d,  $J = 7.8$  Hz, 1H), 7.42 (td,  $J = 7.5$  Hz and 1.4 Hz, 1H), 7.28-7.30 (m, 2H), 7.18 (td,  $J = 7.8$  Hz and 1.4 Hz, 1H), 7.11 (d,  $J = 7.8$  Hz, 1H), 3.33 (d,  $J = 18.6$ Hz, 1H),

3.11 (d,  $J = 18.6$  Hz, 1H), 3.07 (s, 3H), 2.53 (s, 3H), 2.41 (s, 3H).

<sup>13</sup>C NMR (CDCl<sub>3</sub>, 100 MHz): δ 174.7, 173.5, 165.6, 144.2, 141.7, 140.6, 135.0, 131.6, 130.5, 130.1, 128.6, 126.1, 125.9, 122.9, 118.6, 68.8, 37.0, 25.9, 22.8, 14.9.

HRMS (EI) m/z: [M]<sup>+</sup> Calcd for C<sub>20</sub>H<sub>17</sub>BrN<sub>2</sub>O<sub>3</sub>S: 444.0143; Found: 444.0129.

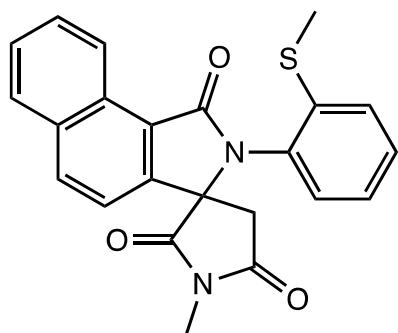

**1'-methyl-2-(2-(methylthio)phenyl)spiro[benzo[e]isoindole-3,3'-pyrrolidine]-1,2',5'(2H)-trione (3ka)**

90% yield.  $R_f = 0.25$  (hexane/EtOAc = 7/3). A white solid. Mp = 273.2 °C

<sup>1</sup>H NMR (CDCl<sub>3</sub>, 400 MHz): δ 9.25 (dt,  $J = 8.5$  Hz and 0.5 Hz, 1H), 8.11 (d,  $J = 8.4$  Hz, 1H), 7.95 (d,  $J = 8.2$  Hz, 1H), 7.71-7.75 (m, 1H), 7.63-7.66 (m, 1H), 7.42-7.47 (m, 1H), 7.30-7.38 (m, 3H), 7.19-7.23

(m, 1H), 3.40 (d,  $J = 18.8$  Hz, 1H), 3.23 (d,  $J = 18.8$  Hz, 1H), 3.12 (s, 3H), 2.42 (s, 3H).

<sup>13</sup>C NMR (CDCl<sub>3</sub>, 100 MHz): δ 174.8, 173.7, 168.4, 144.1, 140.8, 134.6, 134.0, 131.9, 130.4, 130.2, 129.6, 129.1, 128.4, 127.7, 126.1, 125.9, 125.2, 124.6, 116.6, 70.5, 36.5, 26.0, 14.9.

HRMS (EI) m/z: [M]<sup>+</sup> Calcd for C<sub>23</sub>H<sub>18</sub>N<sub>2</sub>O<sub>3</sub>S: 402.1038; Found: 406.1040.

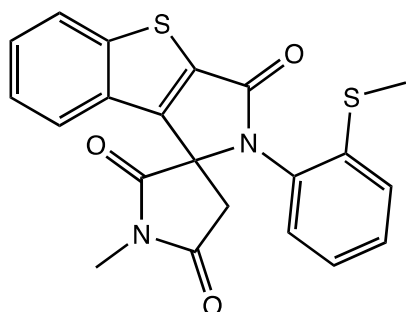

**1'-methyl-2-(2-(methylthio)phenyl)spiro[benzo[4,5]thieno[2,3-c]pyrrole-1,3'-pyrrolidine]-2',3,5'(2H)-trione (3la)**

27% yield.  $R_f = 0.38$  (hexane/Et<sub>2</sub>O = 3/7). A white solid. Mp = 231.3 °C

<sup>1</sup>H NMR (CDCl<sub>3</sub>, 400 MHz): δ 8.56-8.58 (m, 1H), 7.94 (dd,  $J = 8.0$  Hz and 1.5 Hz, 1H), 7.88-7.91 (m, 1H), 7.49-7.54 (m, 2H), 7.41 (td,  $J = 7.8$  Hz and 1.6 Hz, 1H), 7.33 (td,  $J = 7.8$  Hz and 1.6 Hz, 1H), 7.26

(dd,  $J = 7.8$  Hz and 1.4 Hz, 1H), 5.11 (d,  $J = 8.5$  Hz, 1H), 5.01 (d,  $J = 8.5$  Hz, 1H), 2.99 (s, 3H), 2.41 (s, 3H).

**<sup>13</sup>C NMR** (CDCl<sub>3</sub>, 100 MHz): δ 174.6, 172.2, 158.8, 142.7, 137.2, 136.1, 133.9, 132.3, 131.4, 129.5, 127.6, 126.0, 125.7, 125.6, 125.5, 123.2, 60.9, 43.9, 25.6 14.8.

**HRMS** (EI) m/z: [M]<sup>+</sup> Calcd for C<sub>21</sub>H<sub>16</sub>N<sub>2</sub>O<sub>3</sub>S<sub>2</sub>: 408.0602; Found: 408.0606.

VIII. Copies of  $^1\text{H}$  &  $^{13}\text{C}$  NMR Spectra:

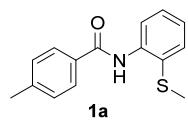

$^1\text{H}$  NMR,  $\text{CDCl}_3$ , 400 MHz

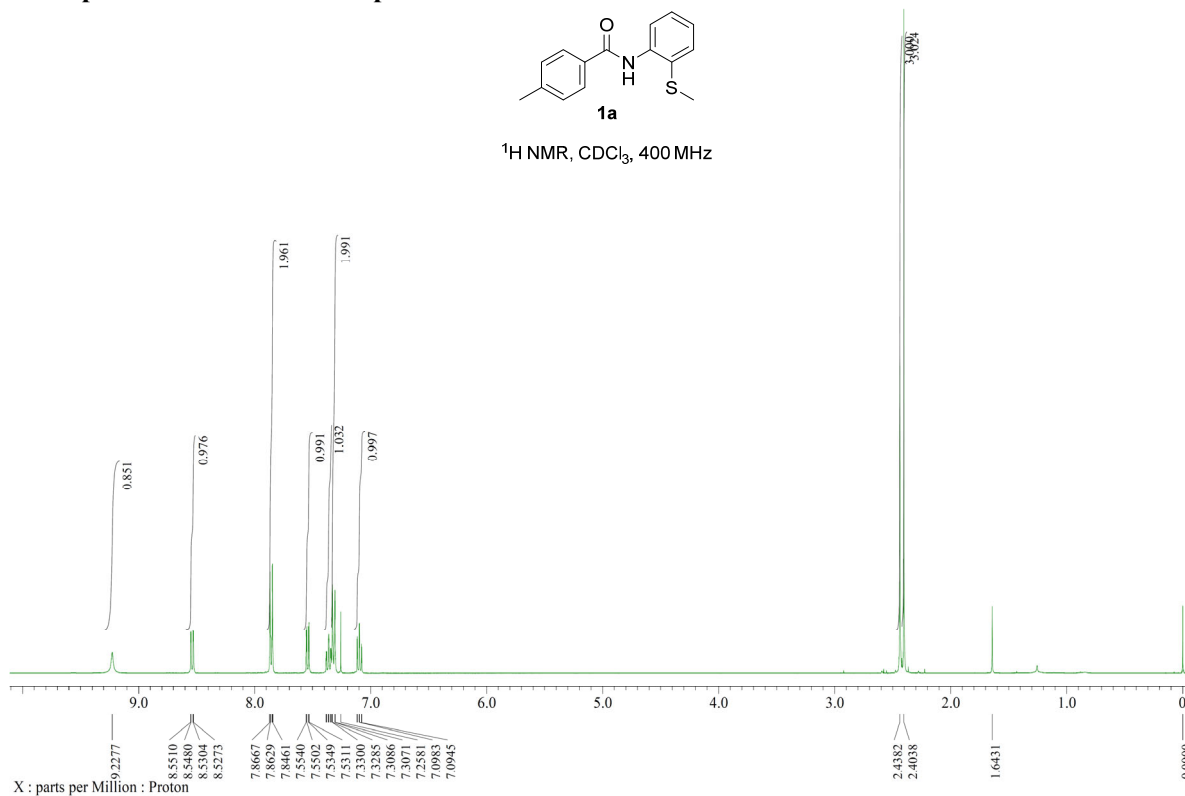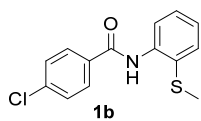

$^1\text{H}$  NMR,  $\text{CDCl}_3$ , 400 MHz

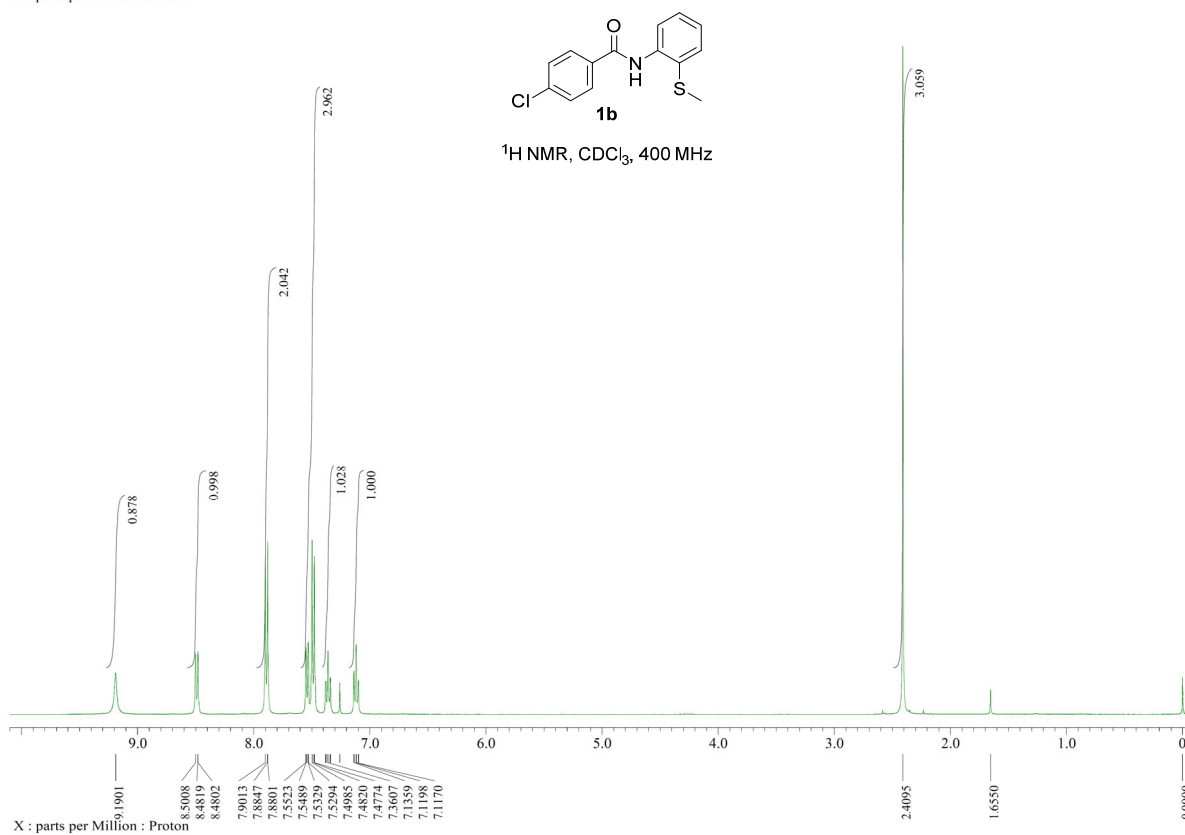

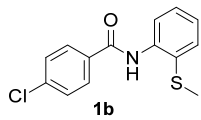

$^{13}\text{C}$  NMR,  $\text{CDCl}_3$ , 101 MHz

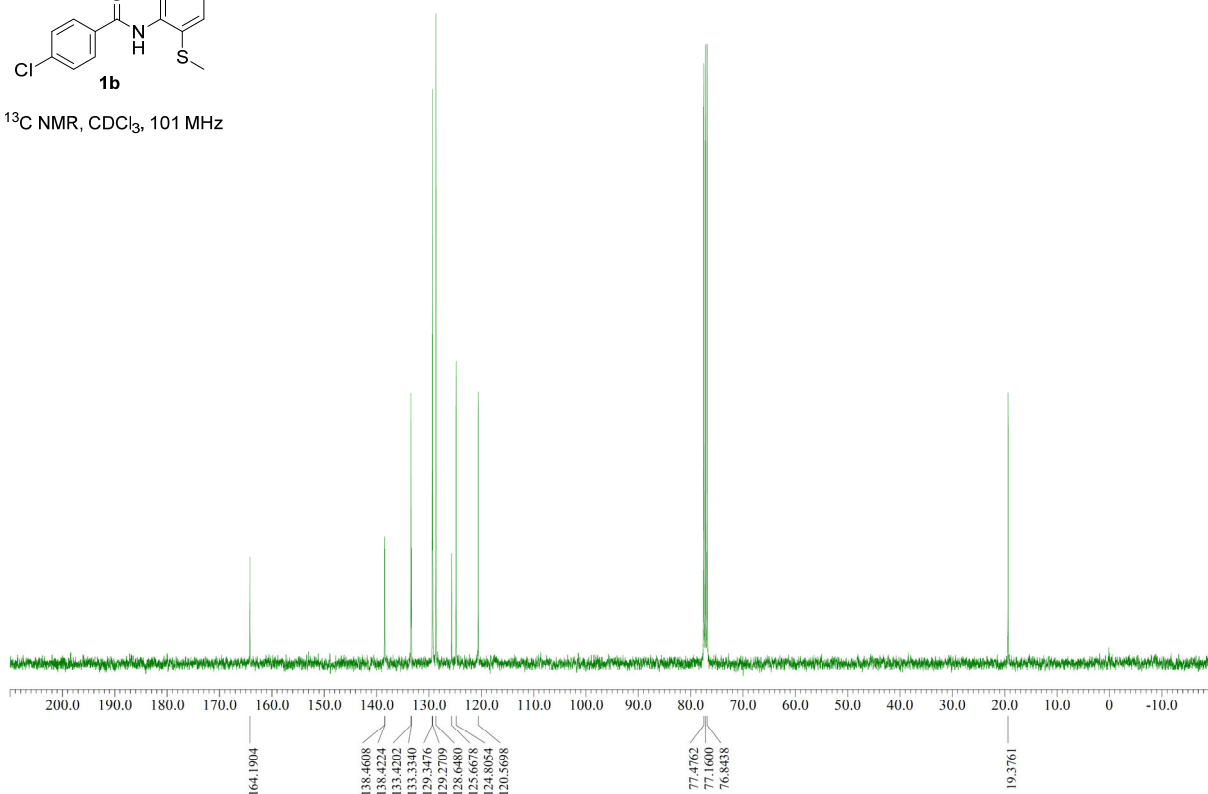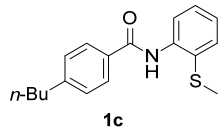

$^1\text{H}$  NMR,  $\text{CDCl}_3$ , 400 MHz

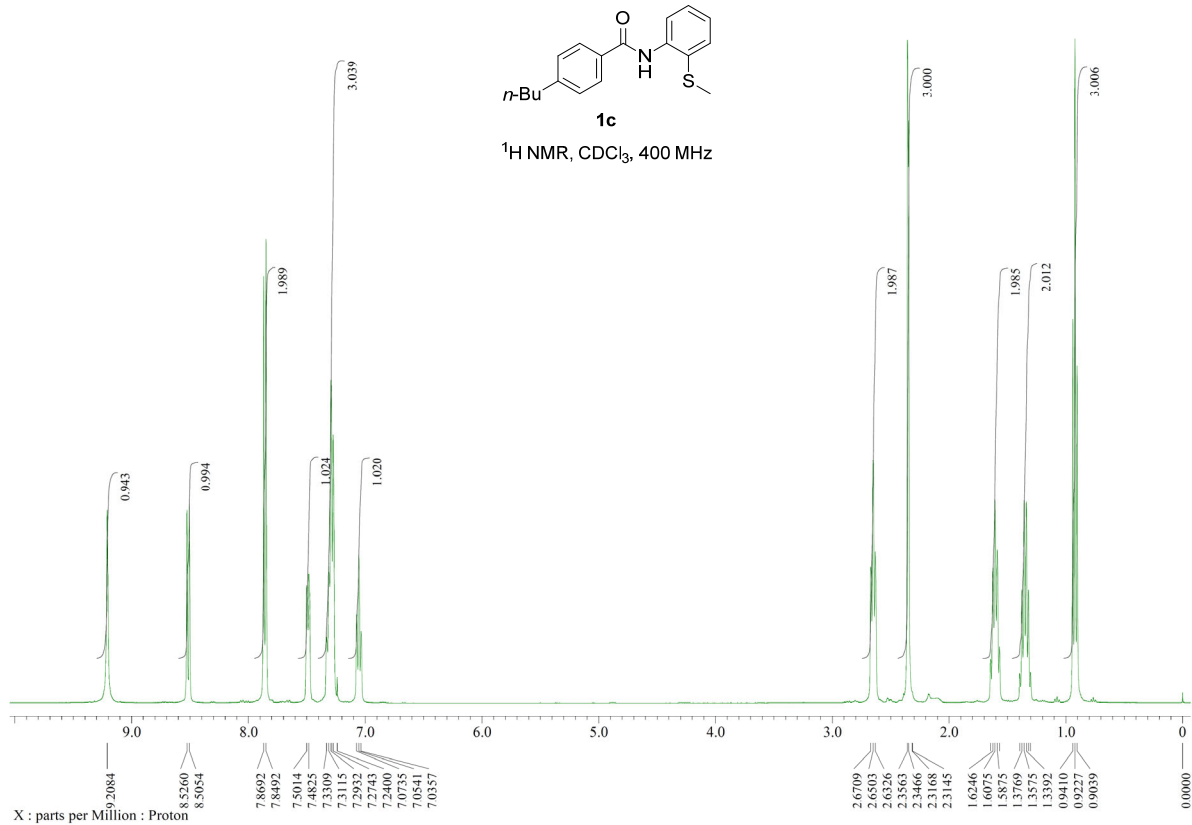

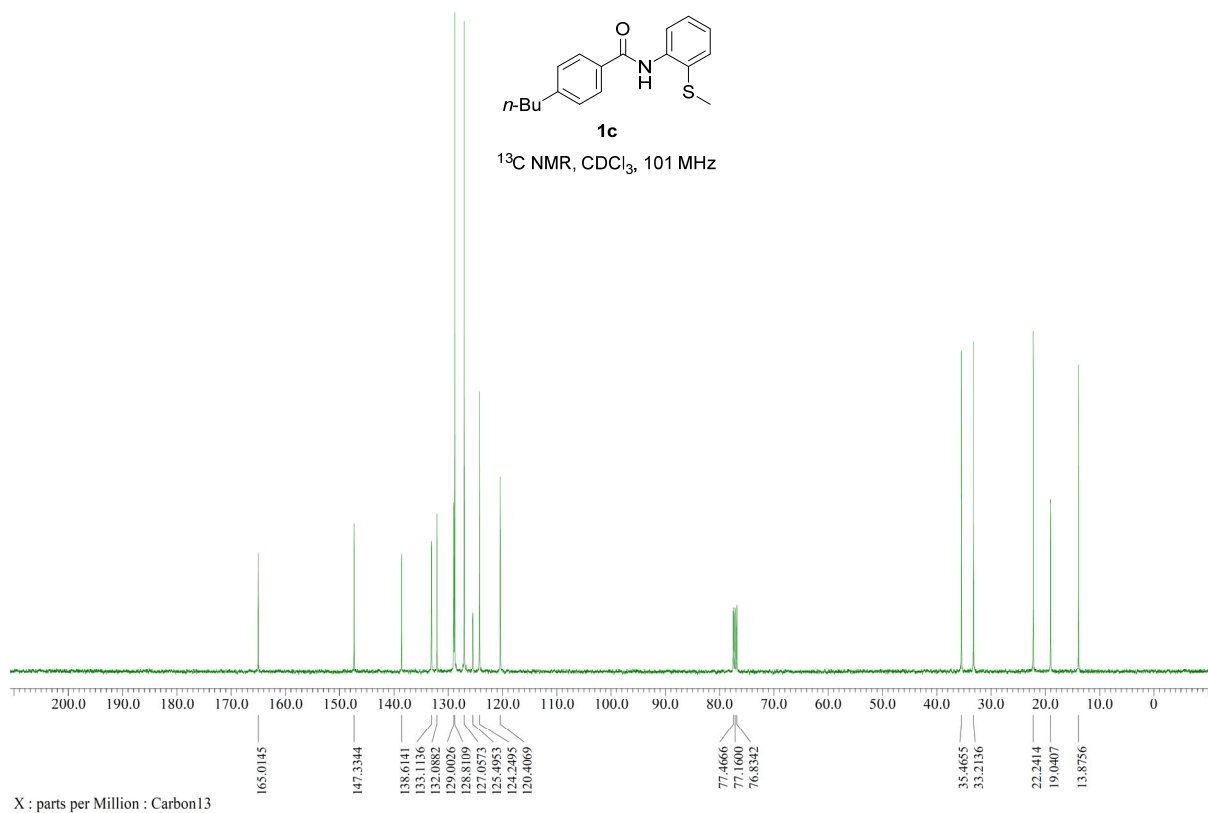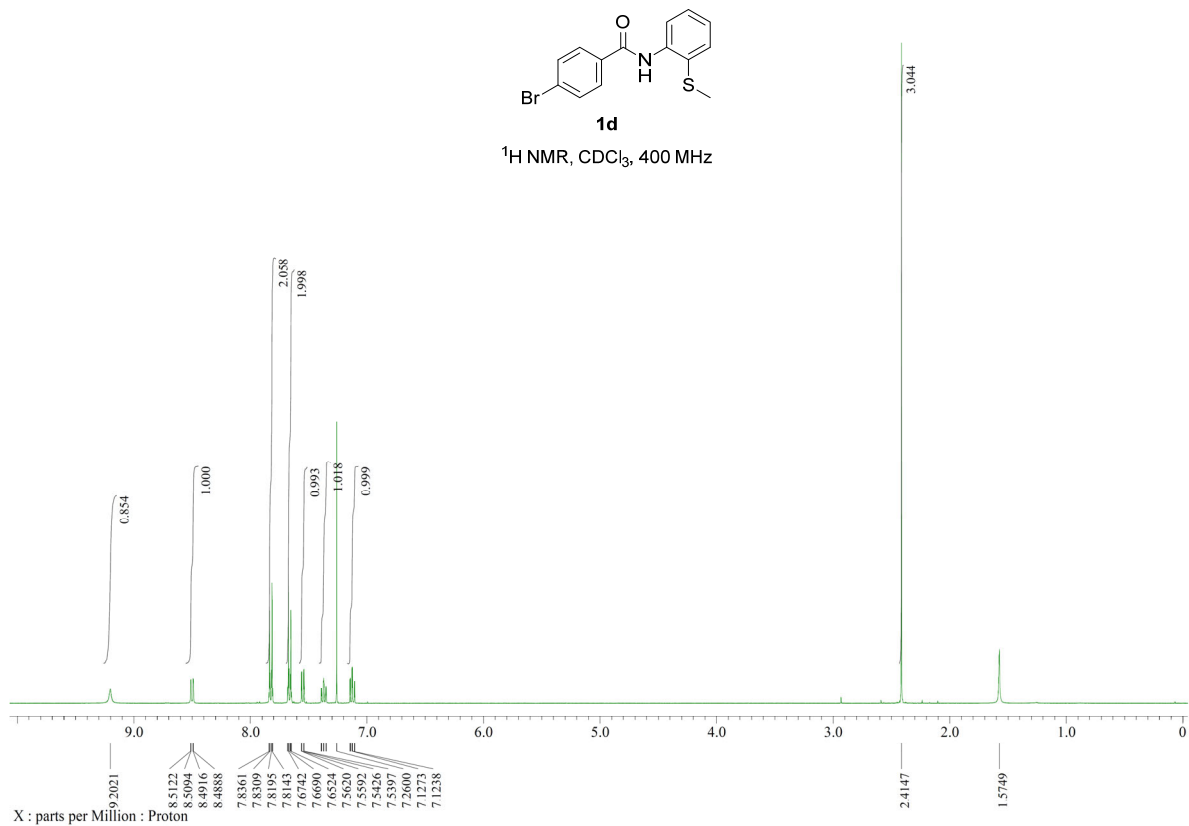



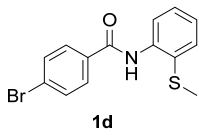

<sup>13</sup>C NMR, CDCl<sub>3</sub>, 101 MHz

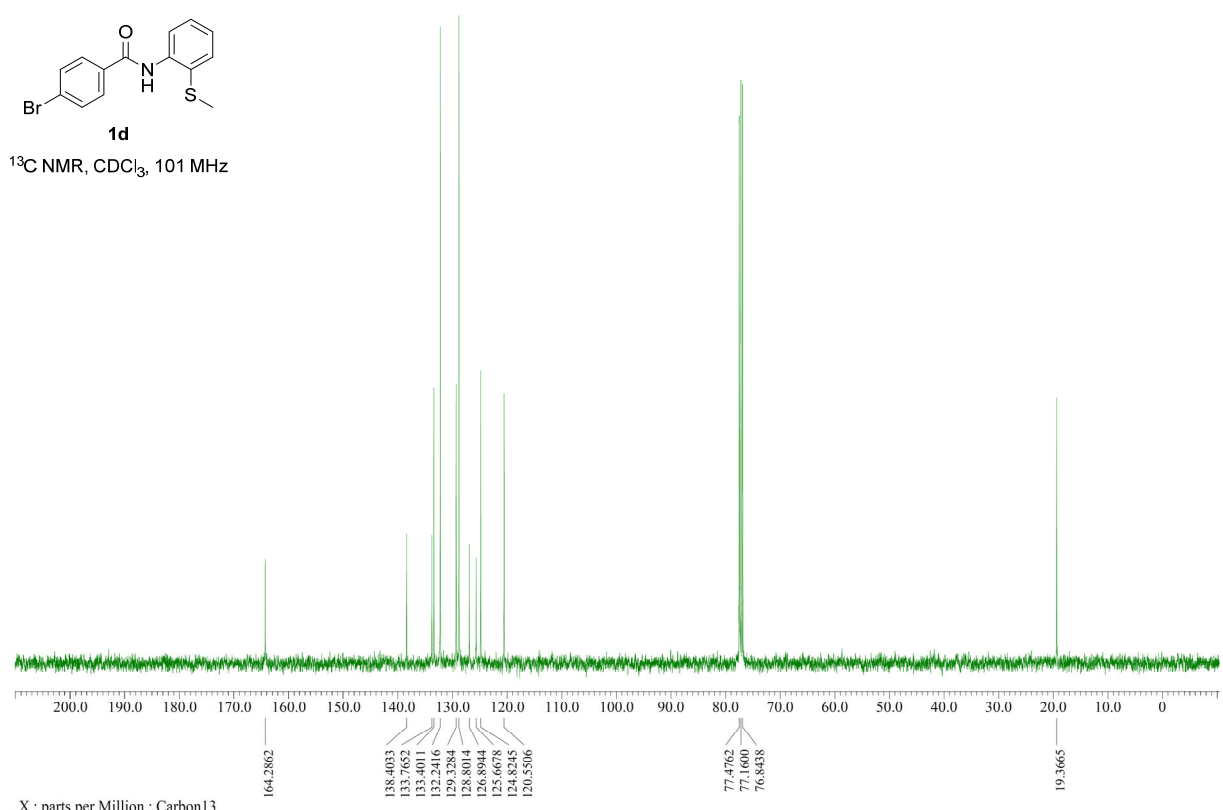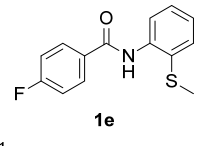

<sup>1</sup>H NMR, CDCl<sub>3</sub>, 400 MHz

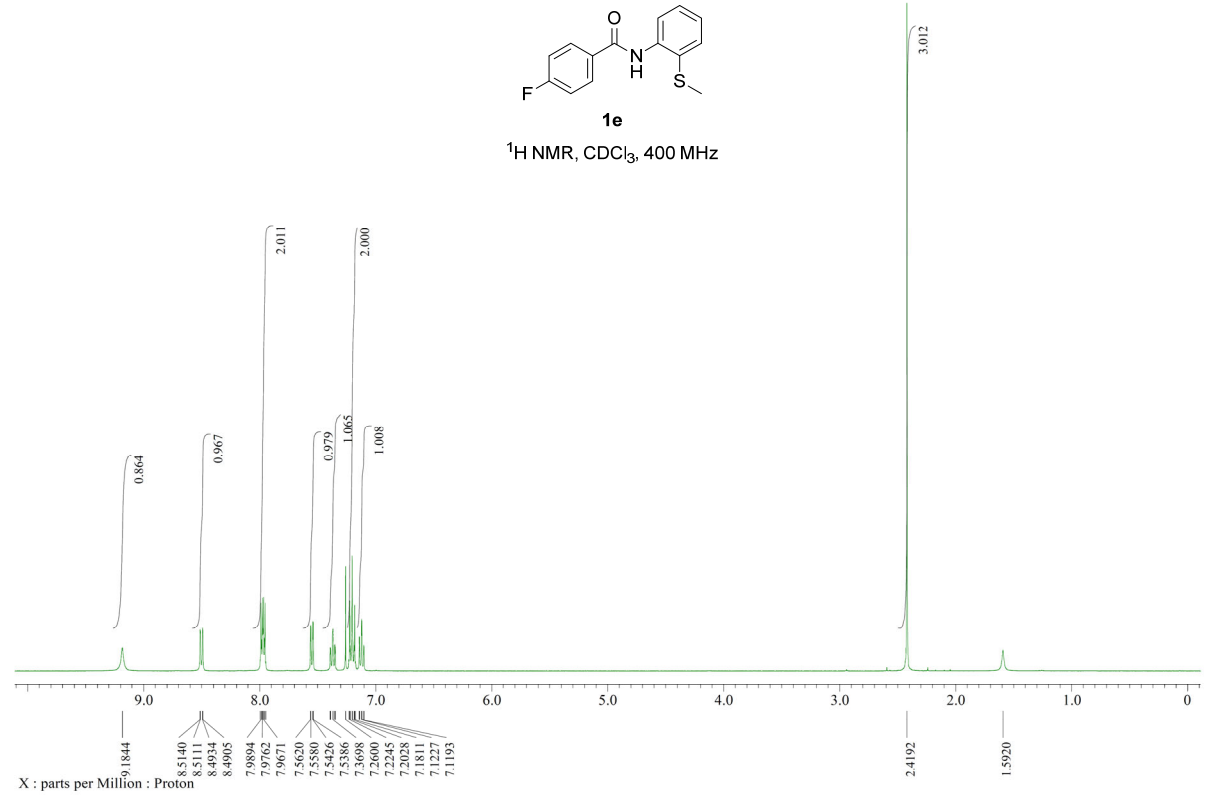

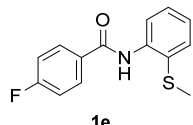

<sup>13</sup>C NMR, CDCl<sub>3</sub>, 101 MHz

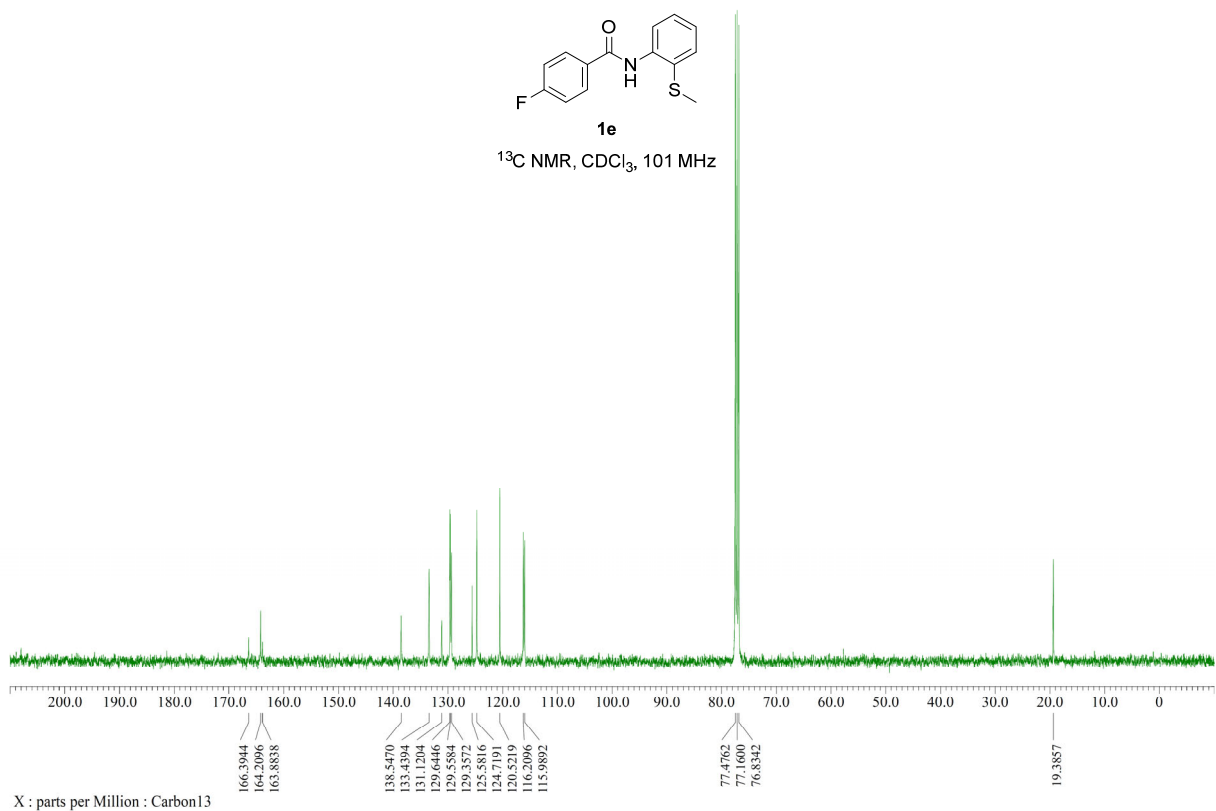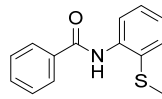

<sup>1</sup>H NMR, CDCl<sub>3</sub>, 400 MHz

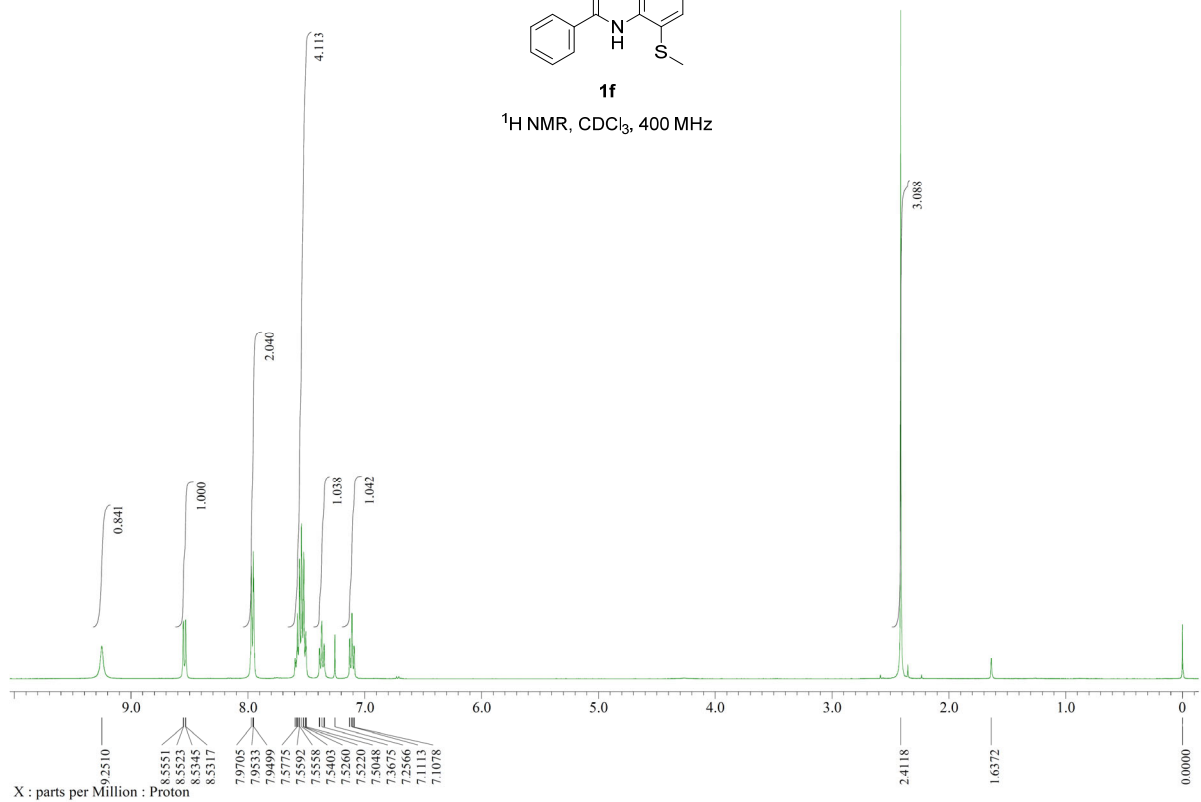

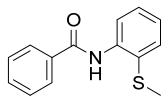

**1f**

$^{13}\text{C}$  NMR,  $\text{CDCl}_3$ , 101 MHz

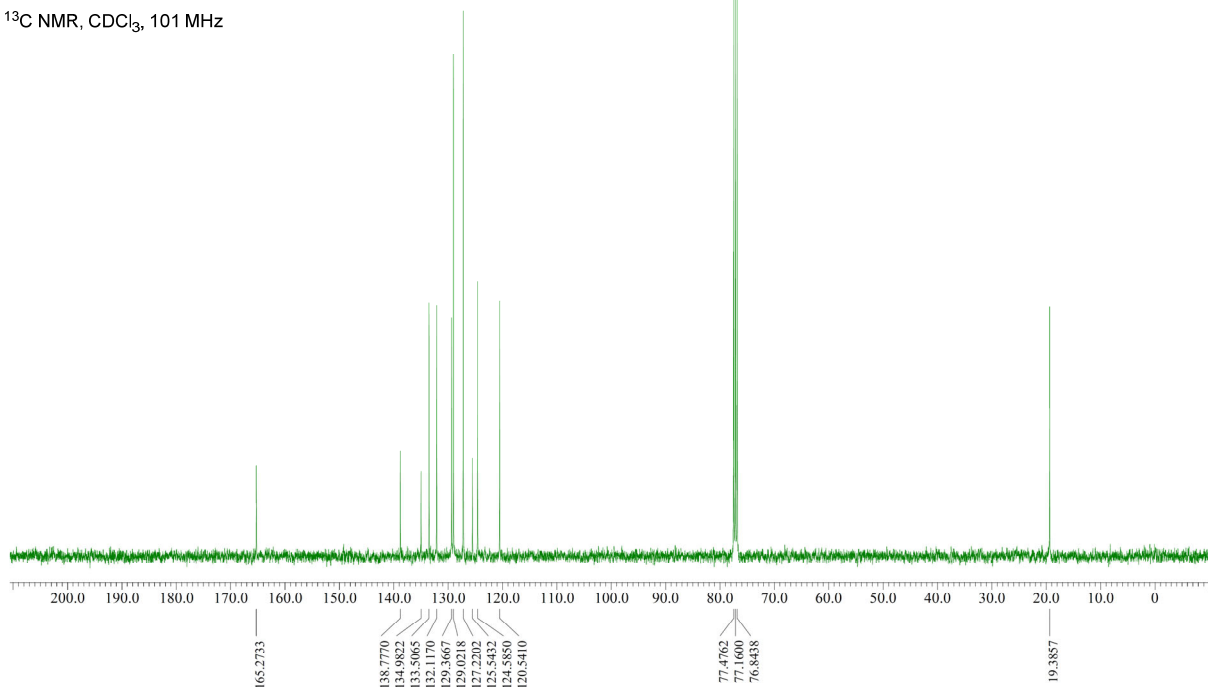

X : parts per Million : Carbon13

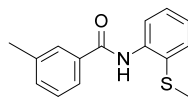

**1g**

$^1\text{H}$  NMR,  $\text{CDCl}_3$ , 400 MHz

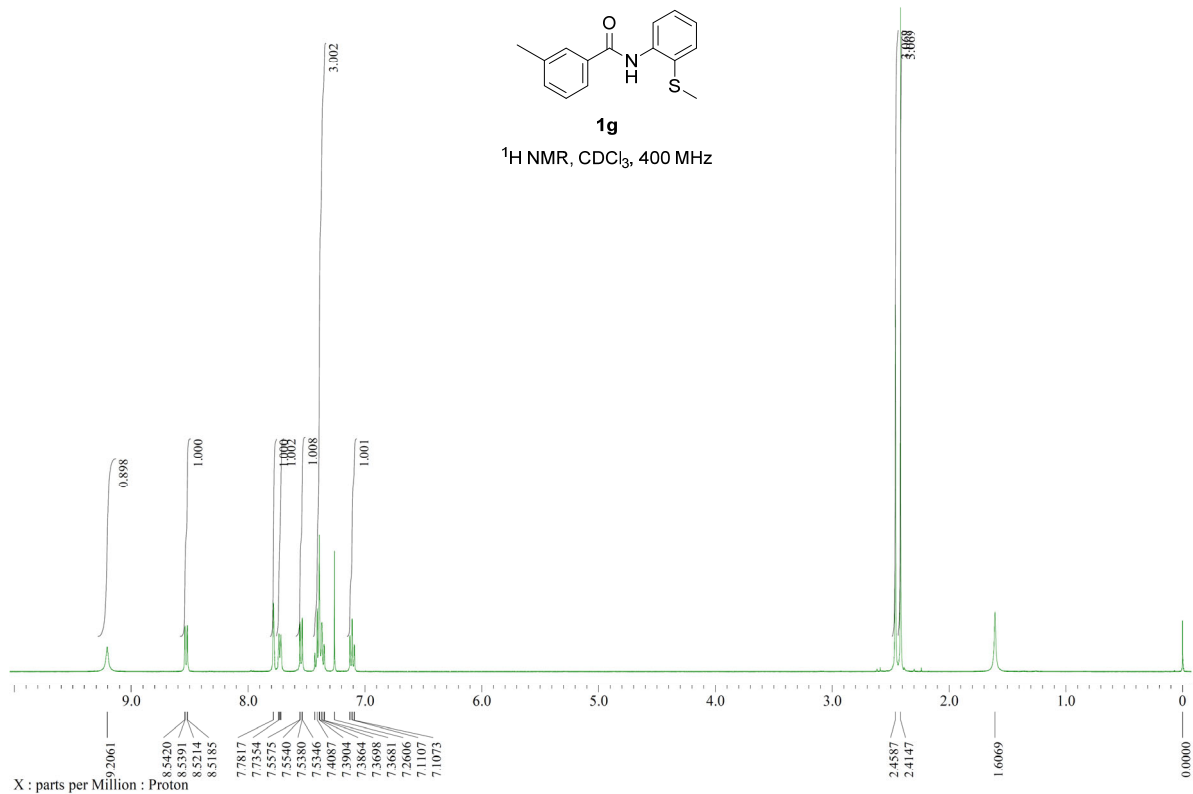

X : parts per Million : Proton

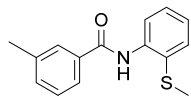

**1g**

<sup>13</sup>C NMR, CDCl<sub>3</sub>, 101 MHz

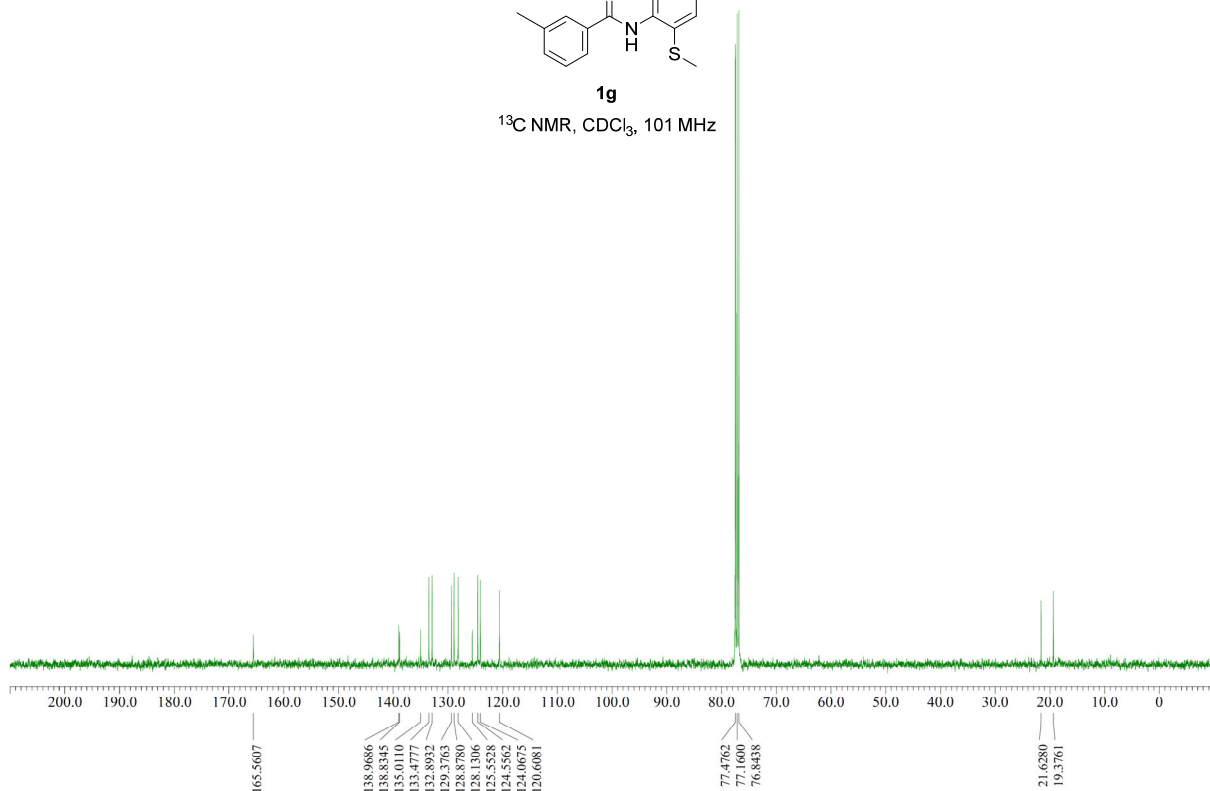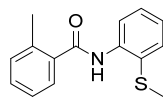

**1h**

<sup>1</sup>H NMR, CDCl<sub>3</sub>, 400 MHz

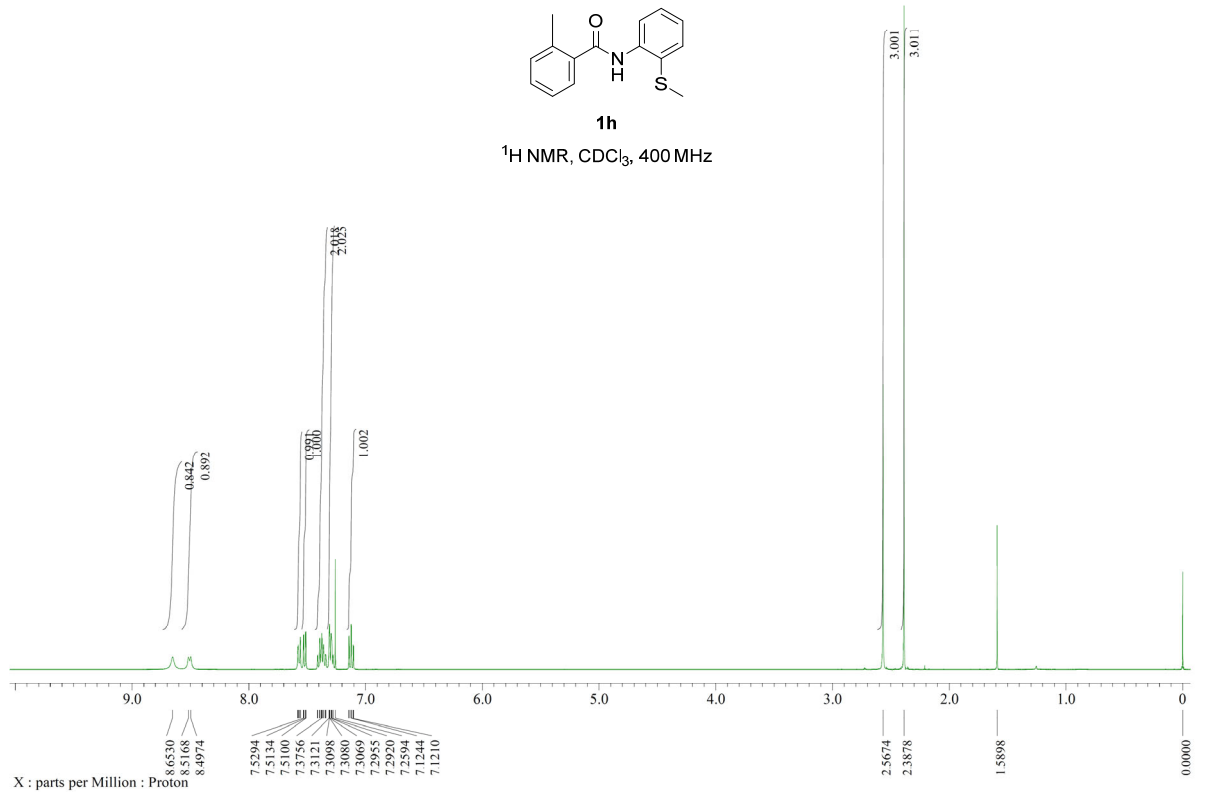

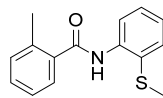

**1h**

$^{13}\text{C}$  NMR,  $\text{CDCl}_3$ , 101 MHz

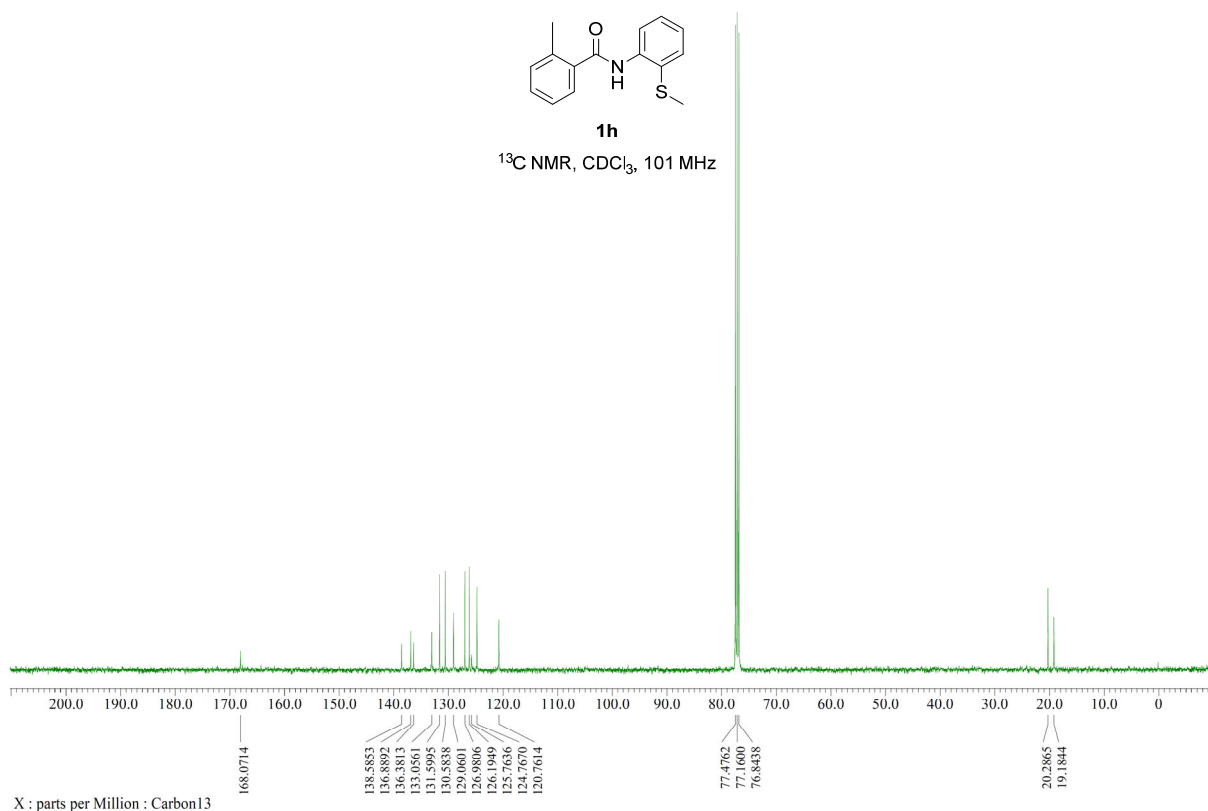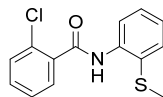

**1i**

$^1\text{H}$  NMR,  $\text{CDCl}_3$ , 400 MHz

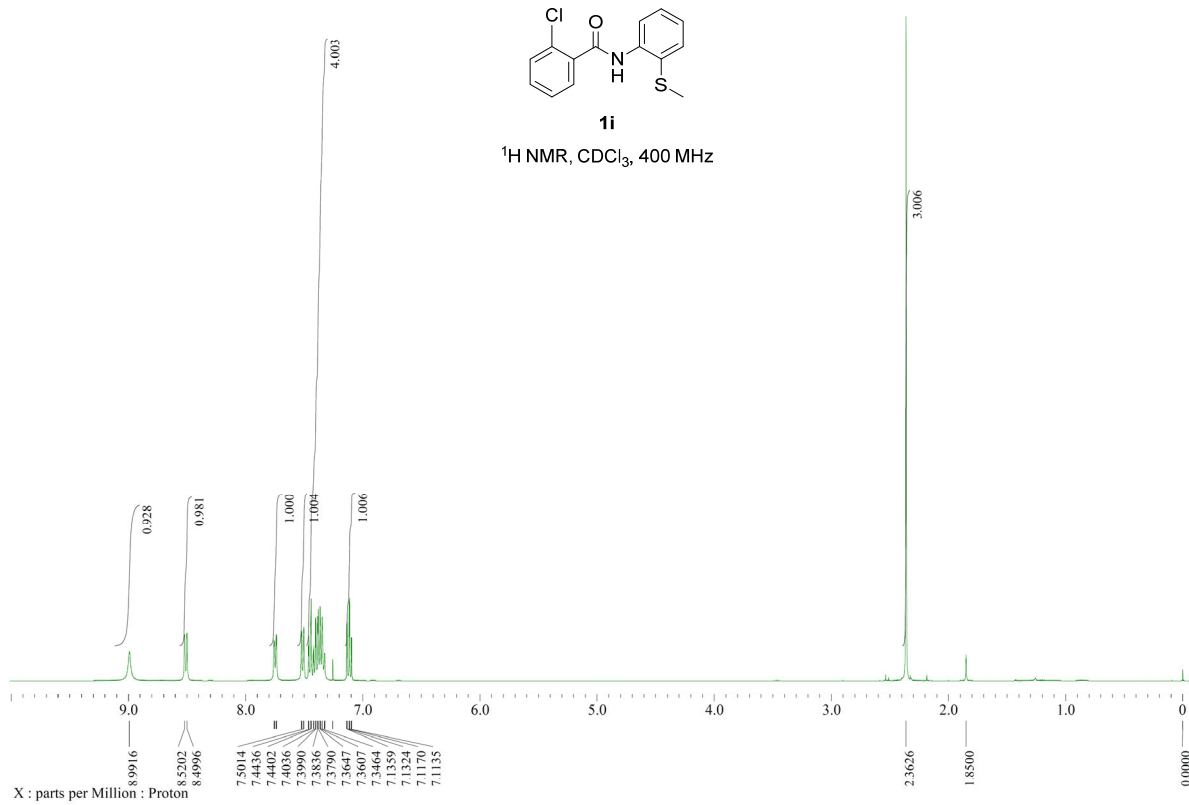

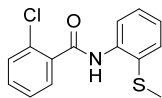

**1i**

$^{13}\text{C}$  NMR,  $\text{CDCl}_3$ , 101 MHz

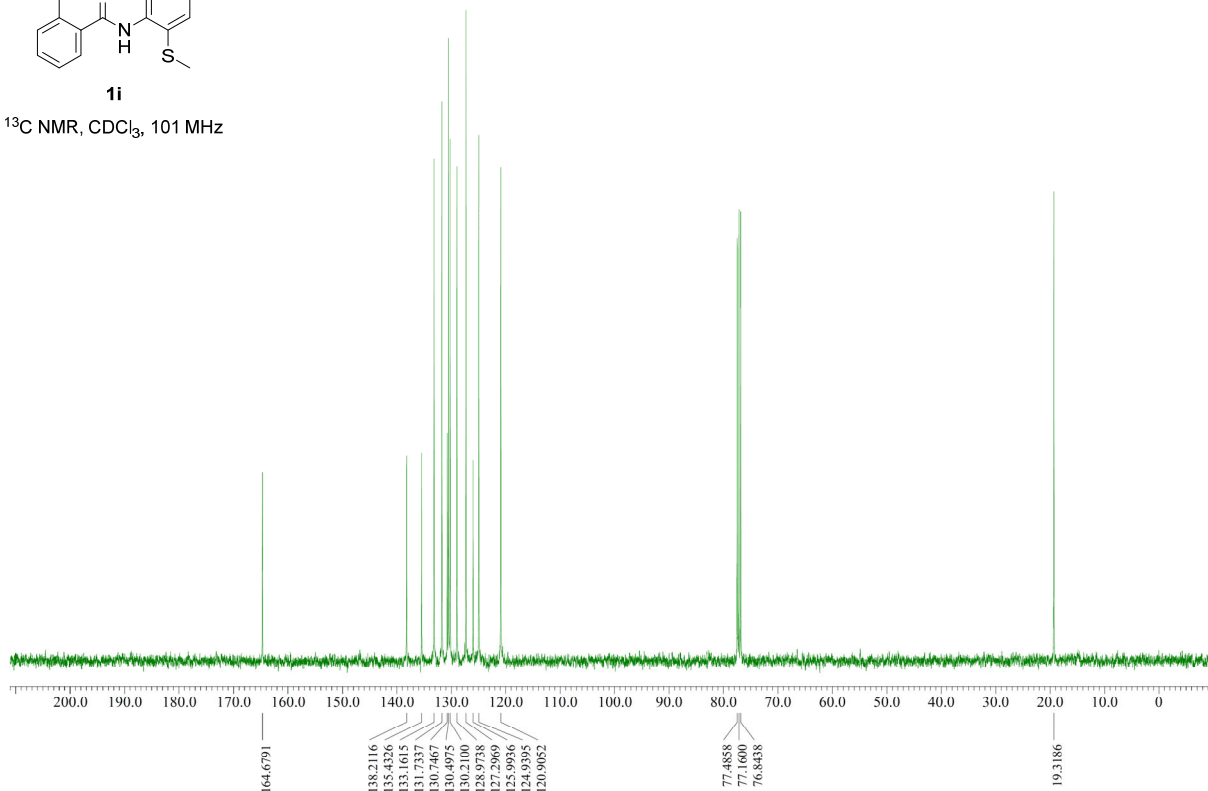

X : parts per Million : Carbon13

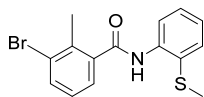

**1j**

$^1\text{H}$  NMR,  $\text{CDCl}_3$ , 400 MHz

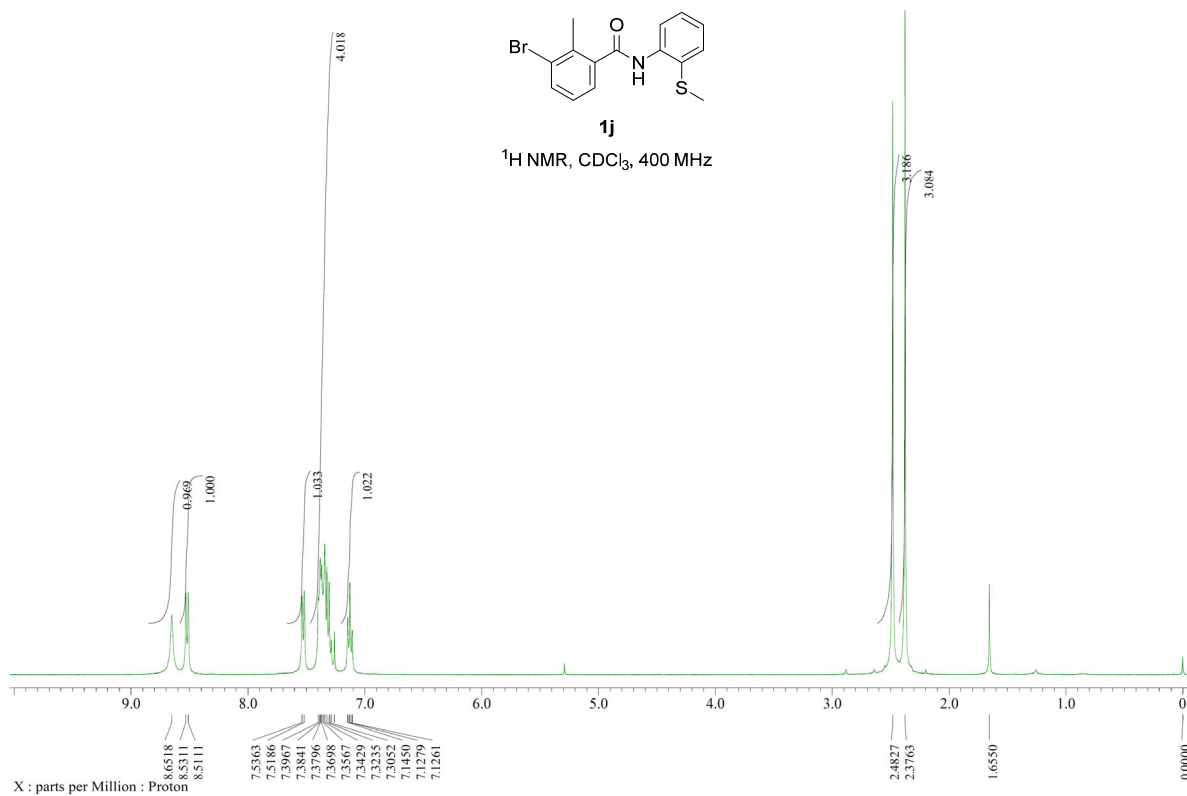

X : parts per Million : Proton

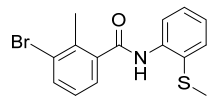

**1j**

<sup>13</sup>C NMR, CDCl<sub>3</sub>, 101 MHz

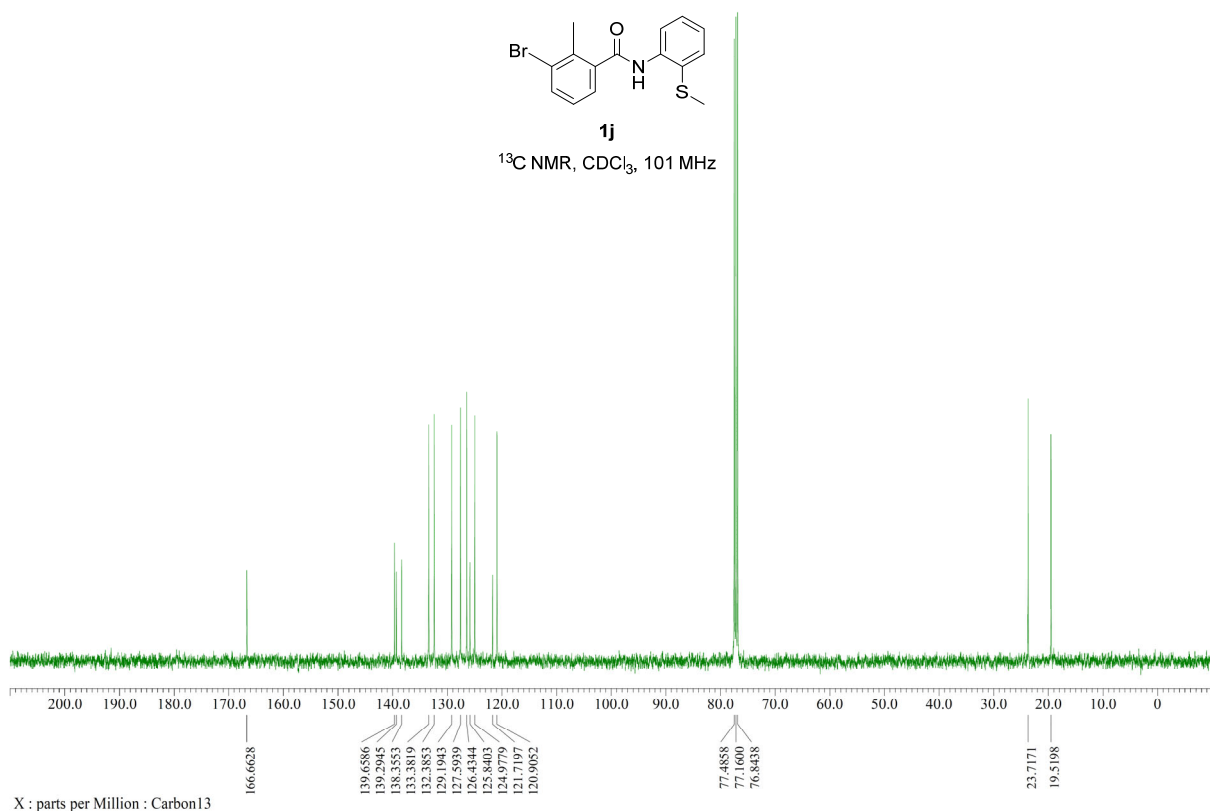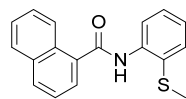

**1k**

<sup>1</sup>H NMR, CDCl<sub>3</sub>, 400 MHz

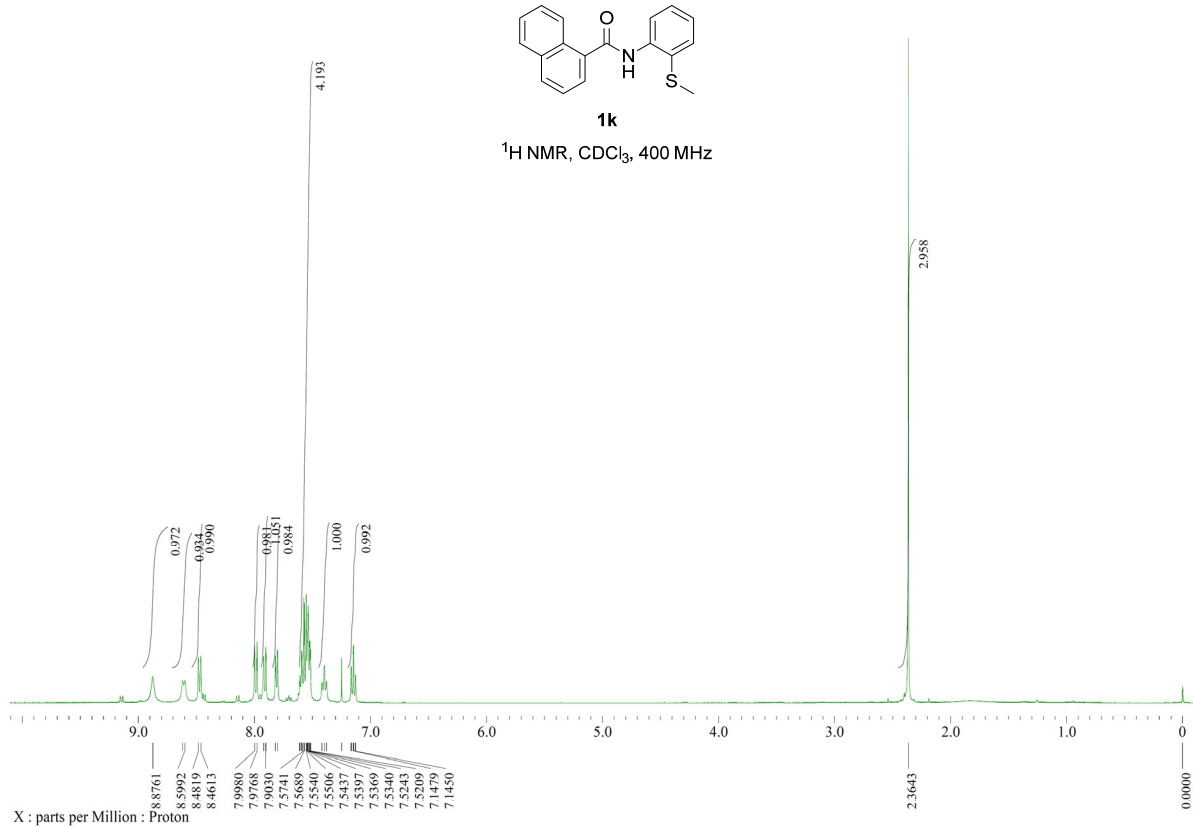

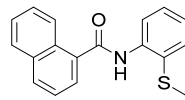

**1k**

$^{13}\text{C}$  NMR,  $\text{CDCl}_3$ , 101 MHz

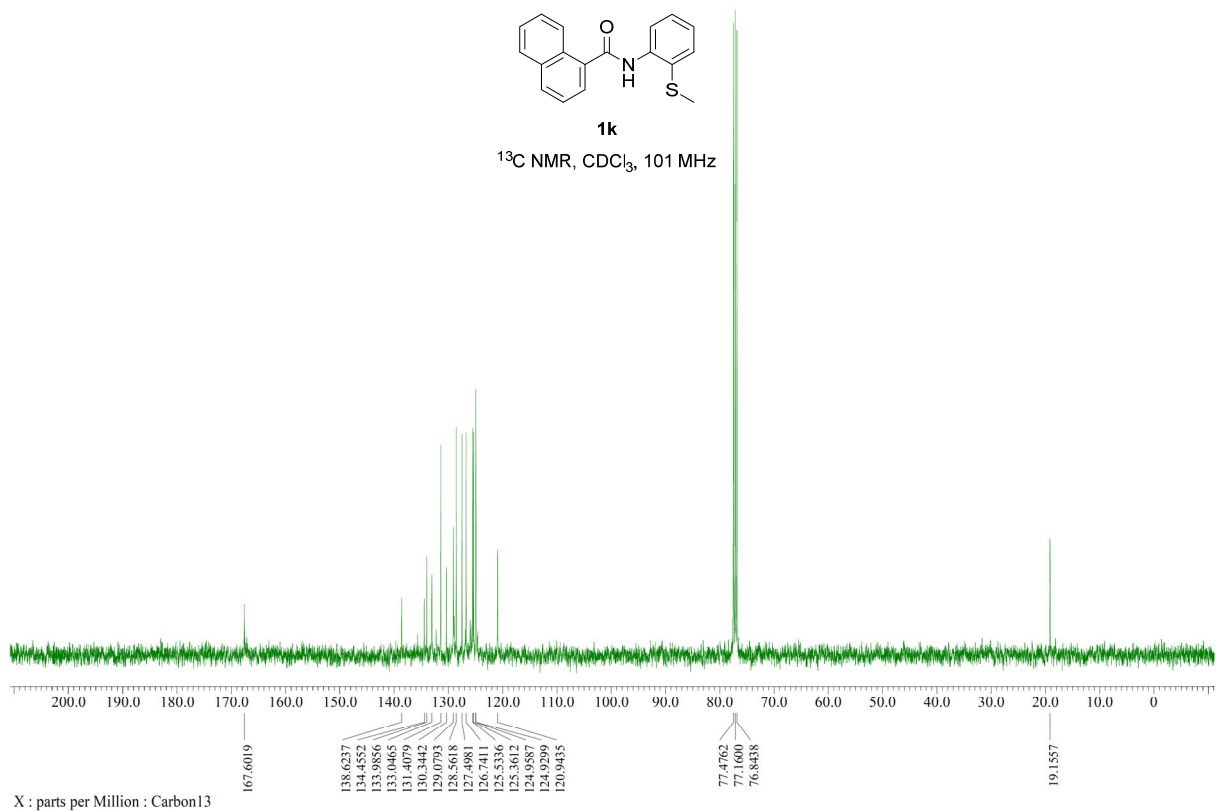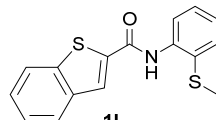

**1l**

$^1\text{H}$  NMR,  $\text{CDCl}_3$ , 400 MHz

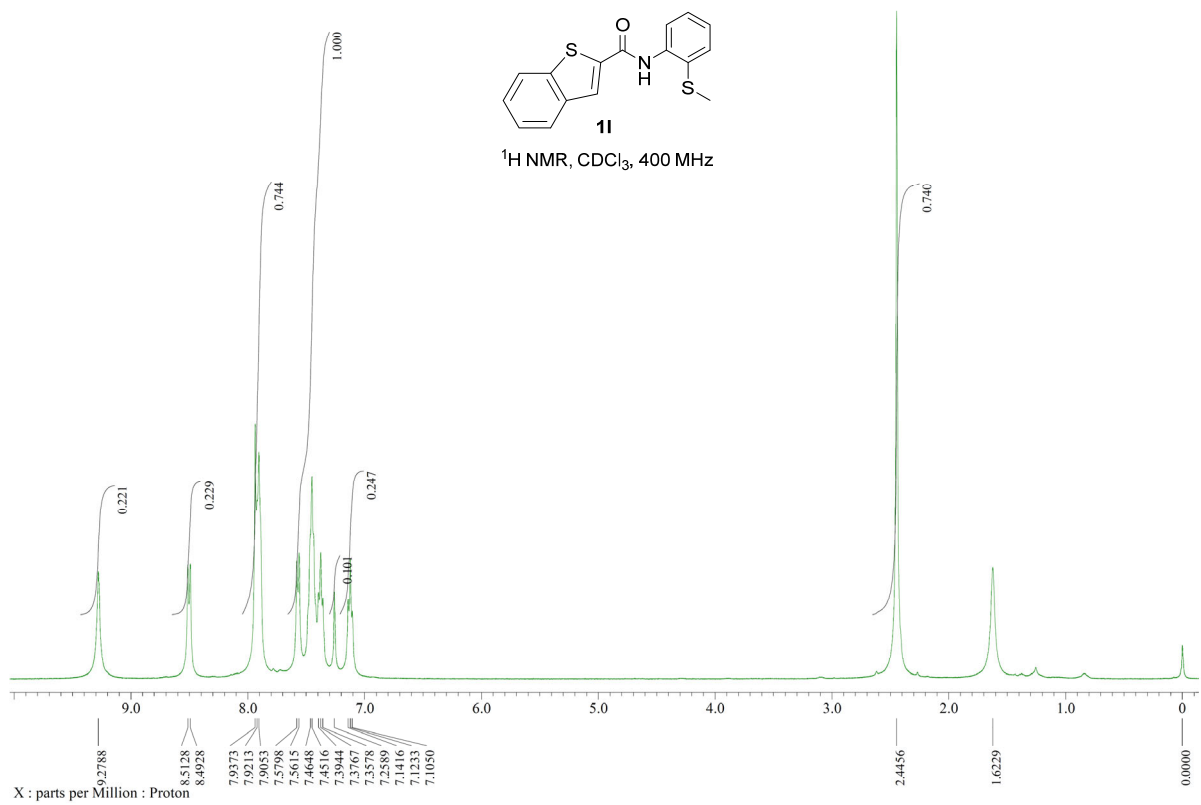



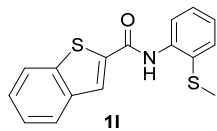

$^{13}\text{C}$  NMR,  $\text{CDCl}_3$ , 101 MHz

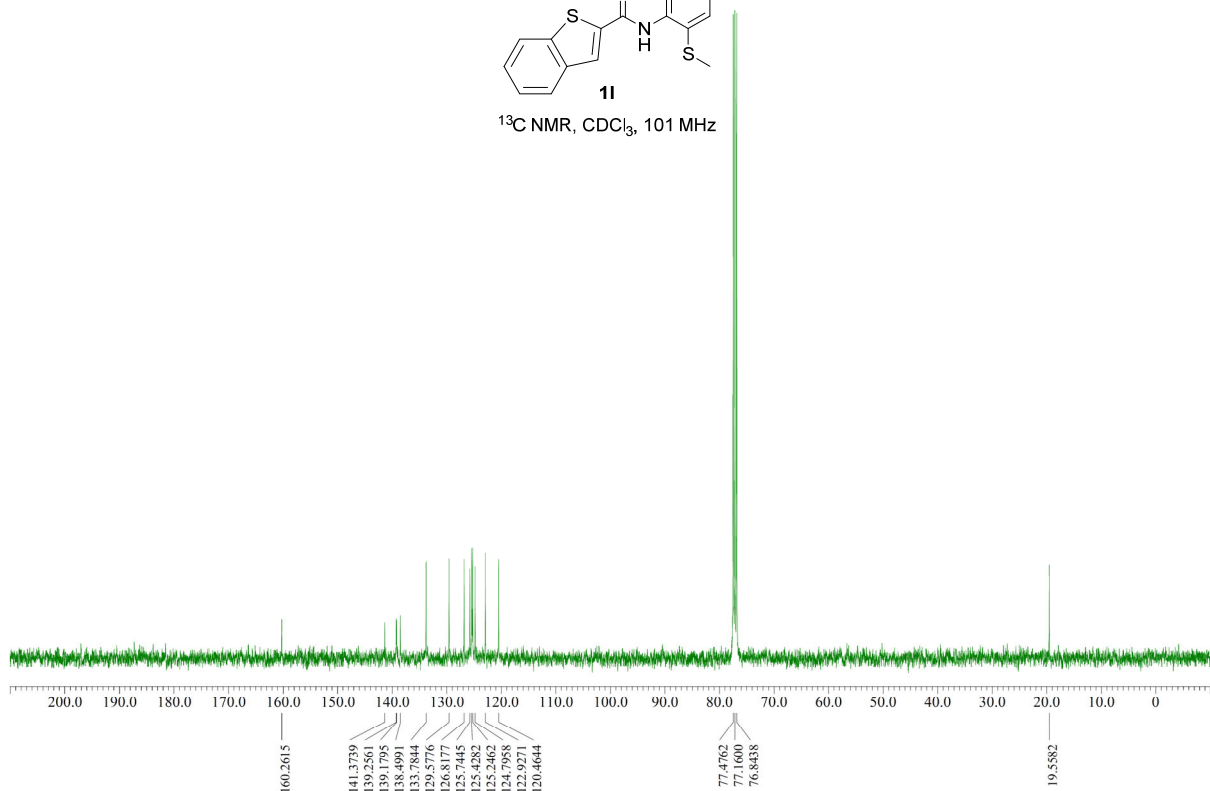

X : parts per Million : Carbon13

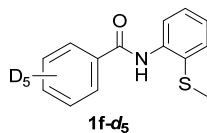

$^1\text{H}$  NMR,  $\text{CDCl}_3$ , 400 MHz

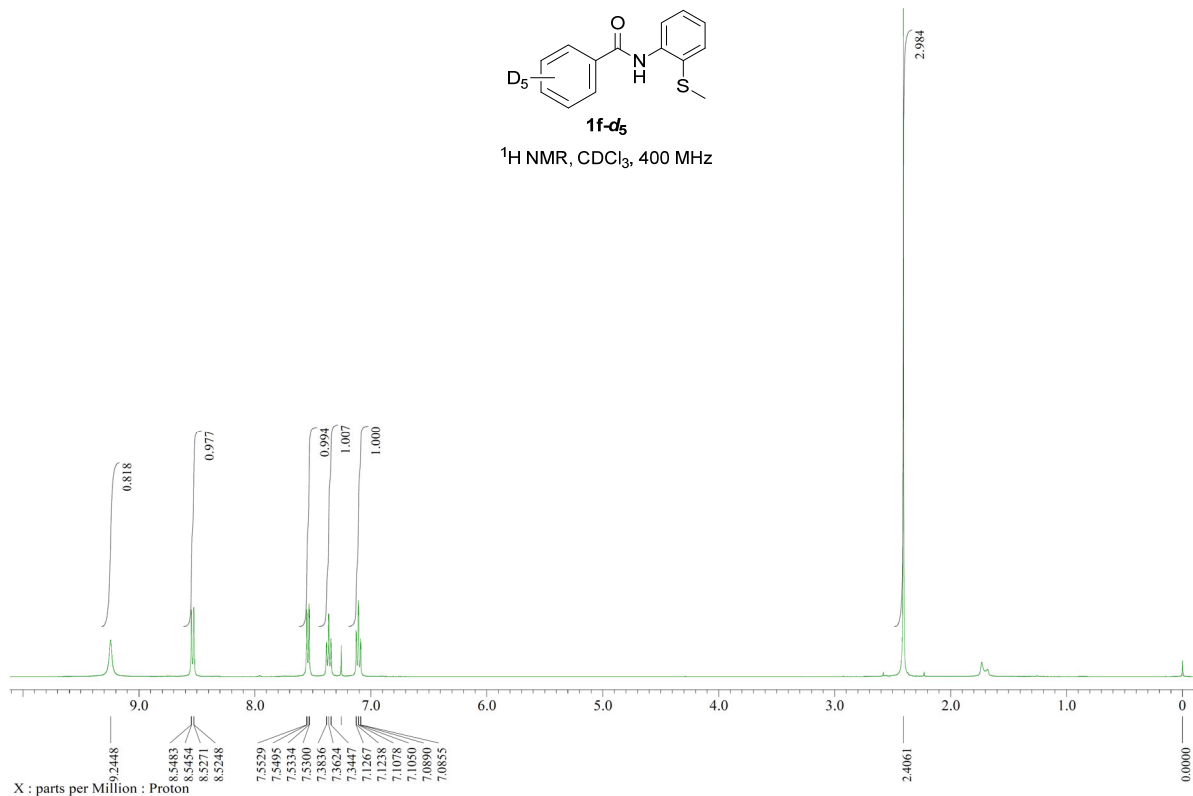

X : parts per Million : Proton

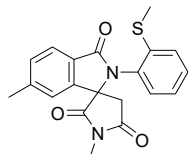

**3aa**

$^1\text{H NMR}$ ,  $\text{CDCl}_3$ , 400 MHz

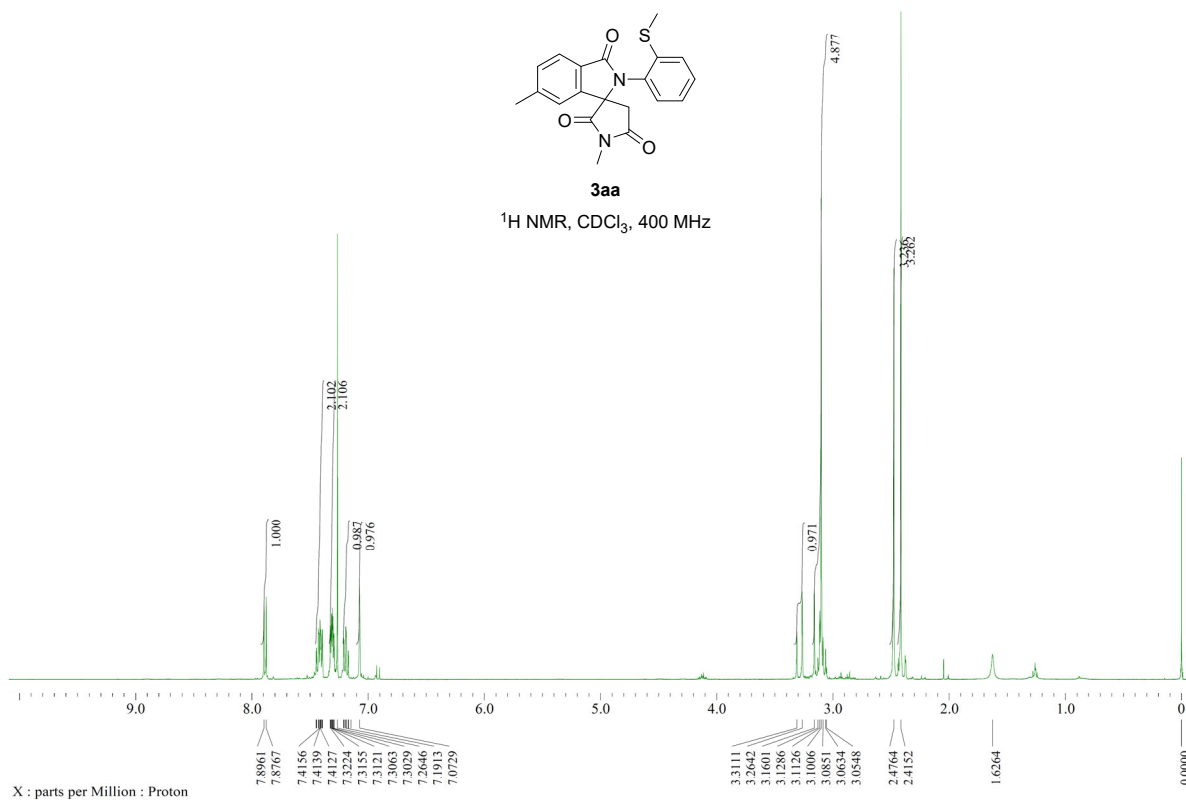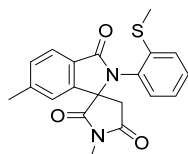

**3aa**

$^{13}\text{C NMR}$ ,  $\text{CDCl}_3$ , 101 MHz

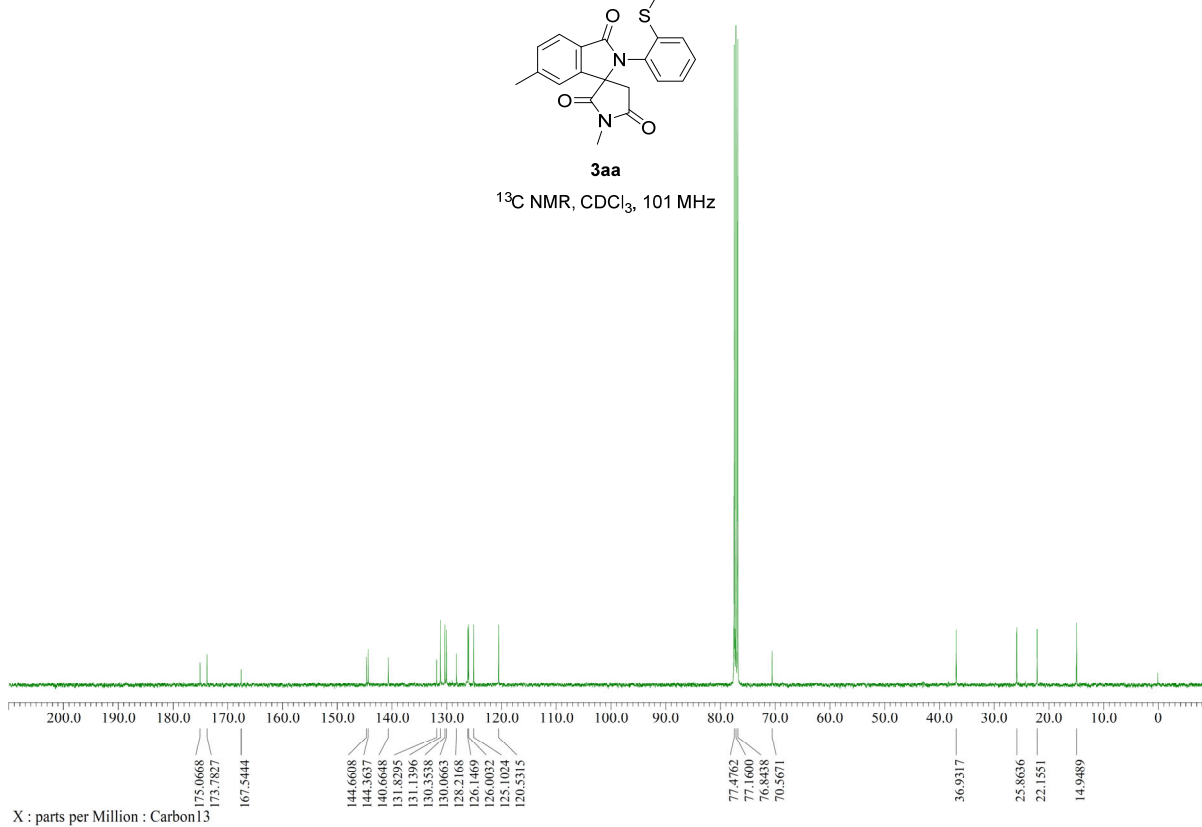

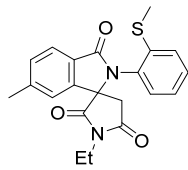

**3ab**

<sup>1</sup>H NMR, CDCl<sub>3</sub>, 400 MHz

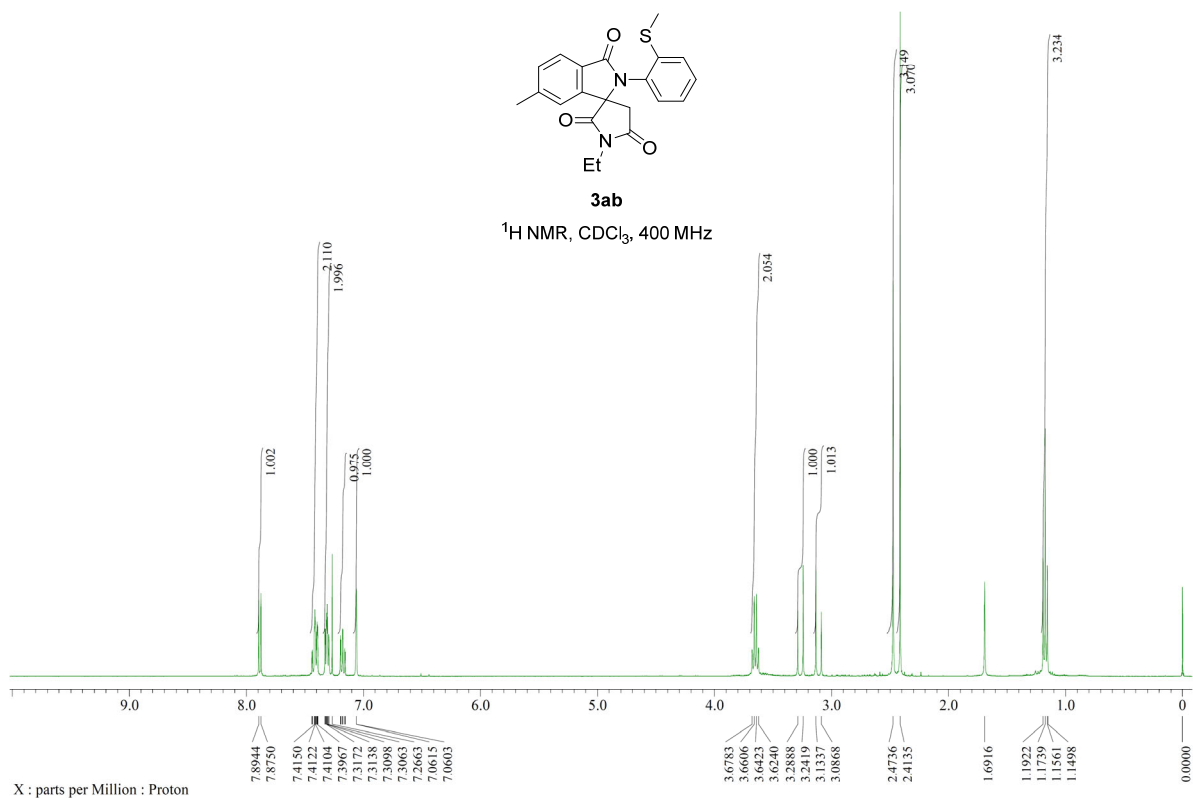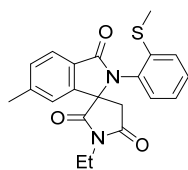

**3ab**

<sup>13</sup>C NMR, CDCl<sub>3</sub>, 101 MHz

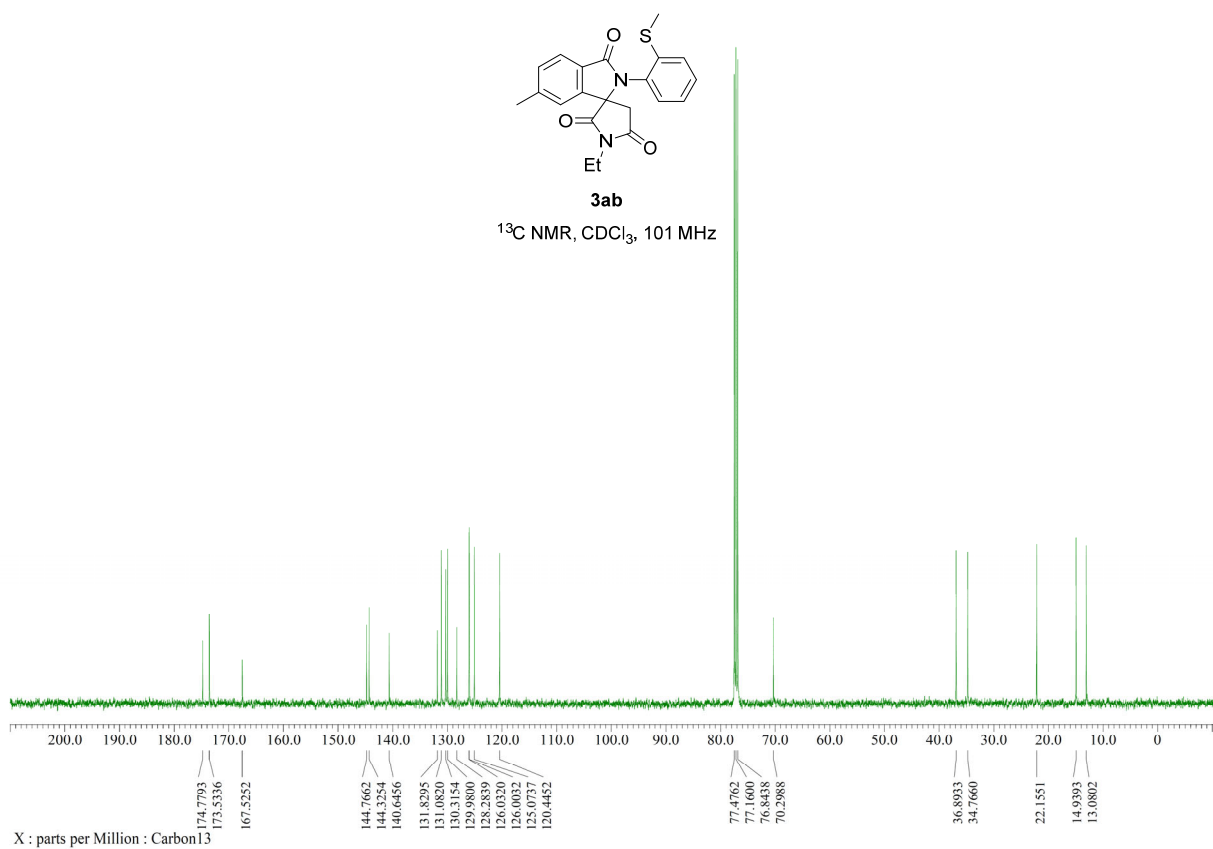

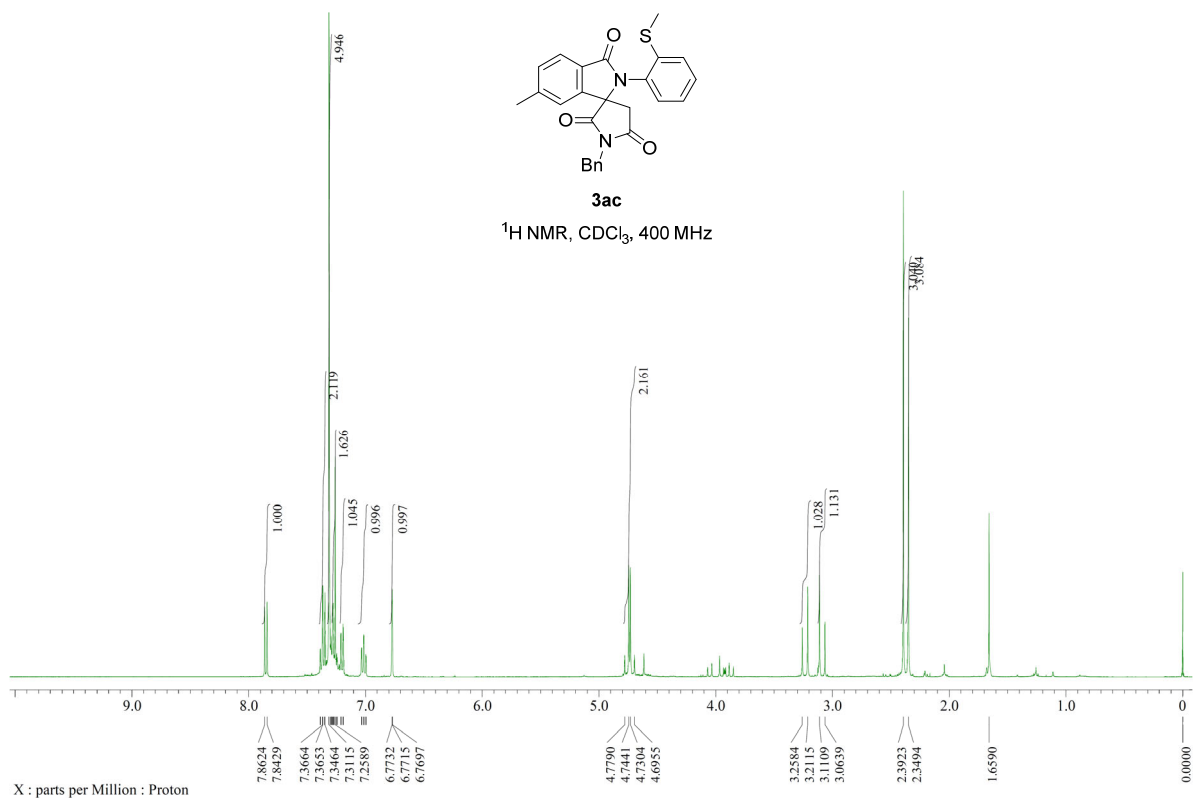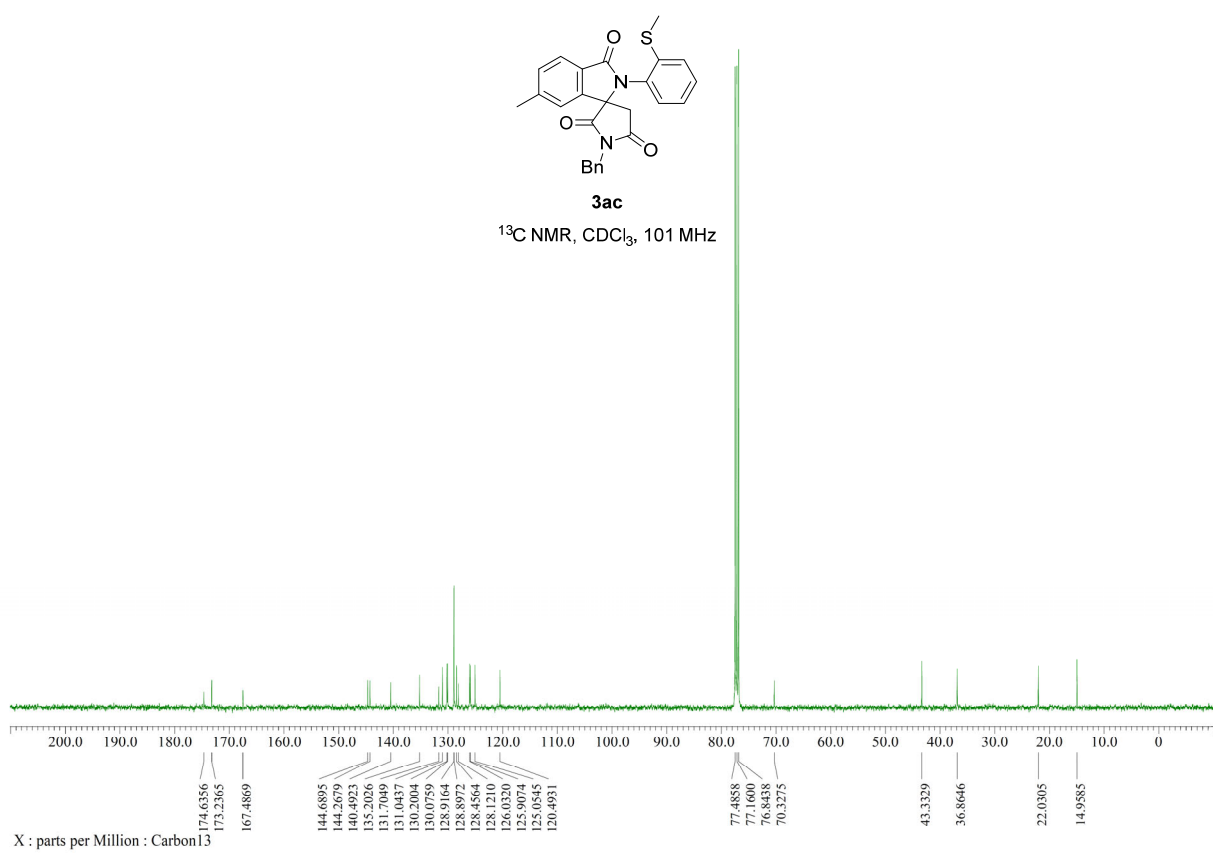

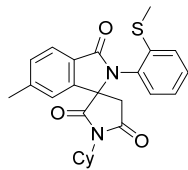

**3ad**

<sup>1</sup>H NMR, CDCl<sub>3</sub>, 400 MHz

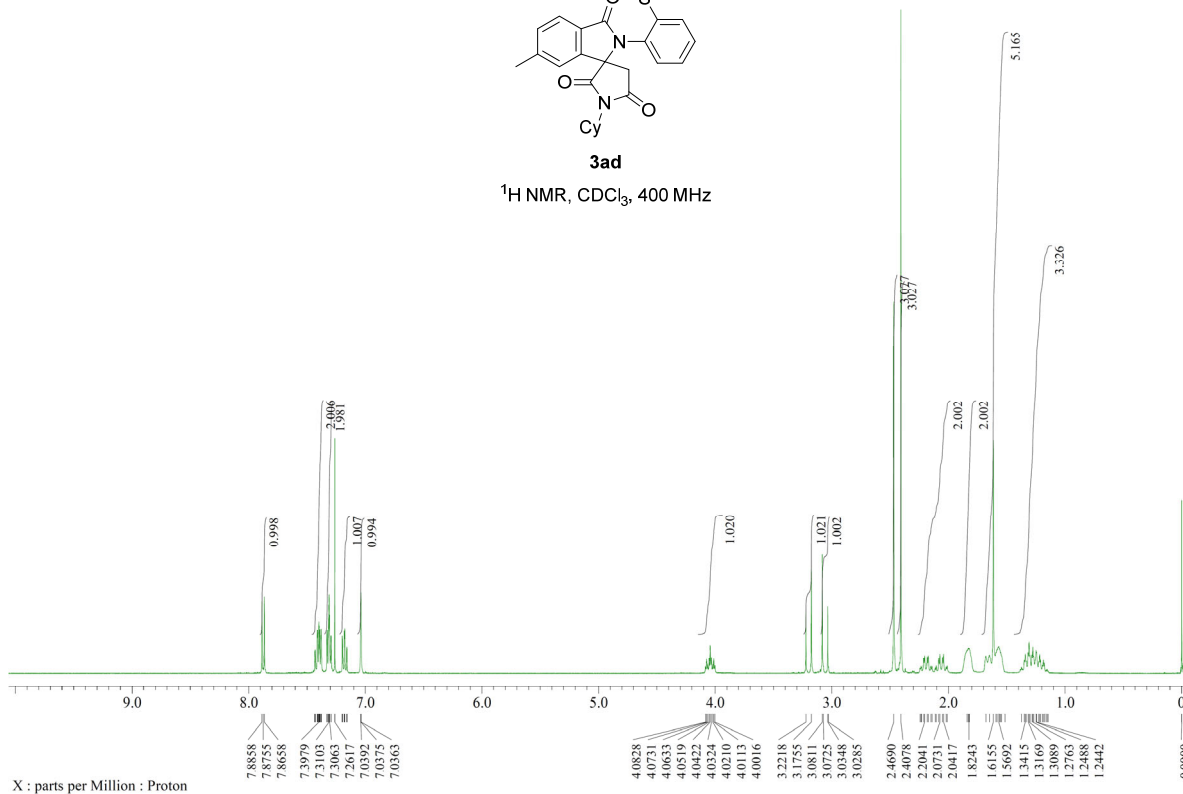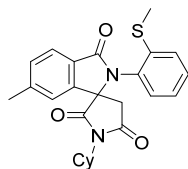

**3ad**

<sup>13</sup>C NMR, CDCl<sub>3</sub>, 101 MHz

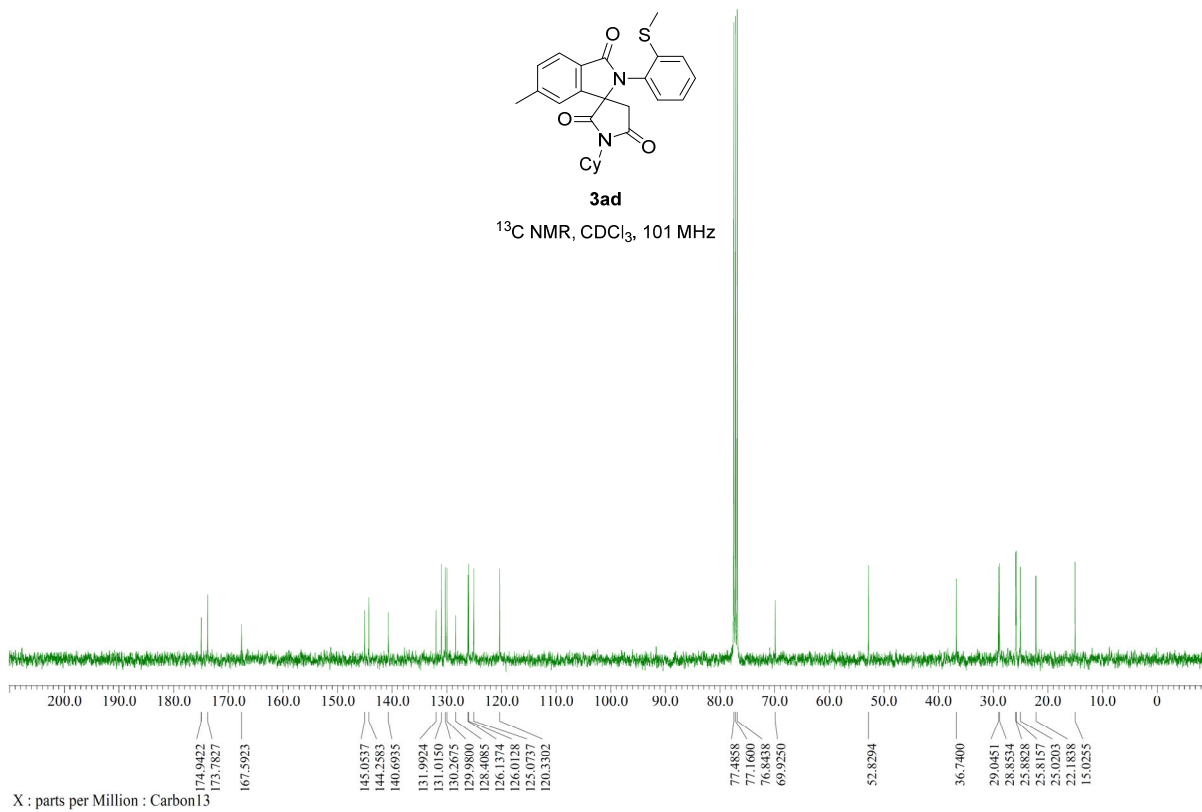

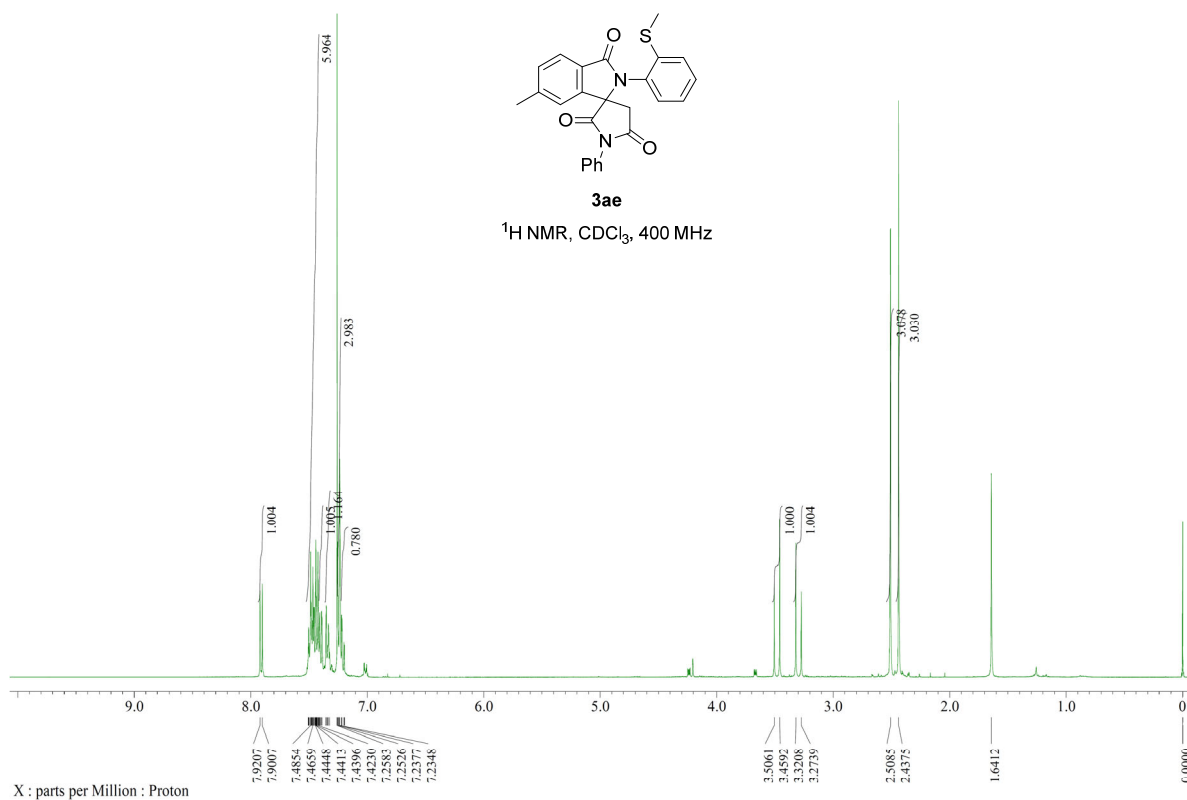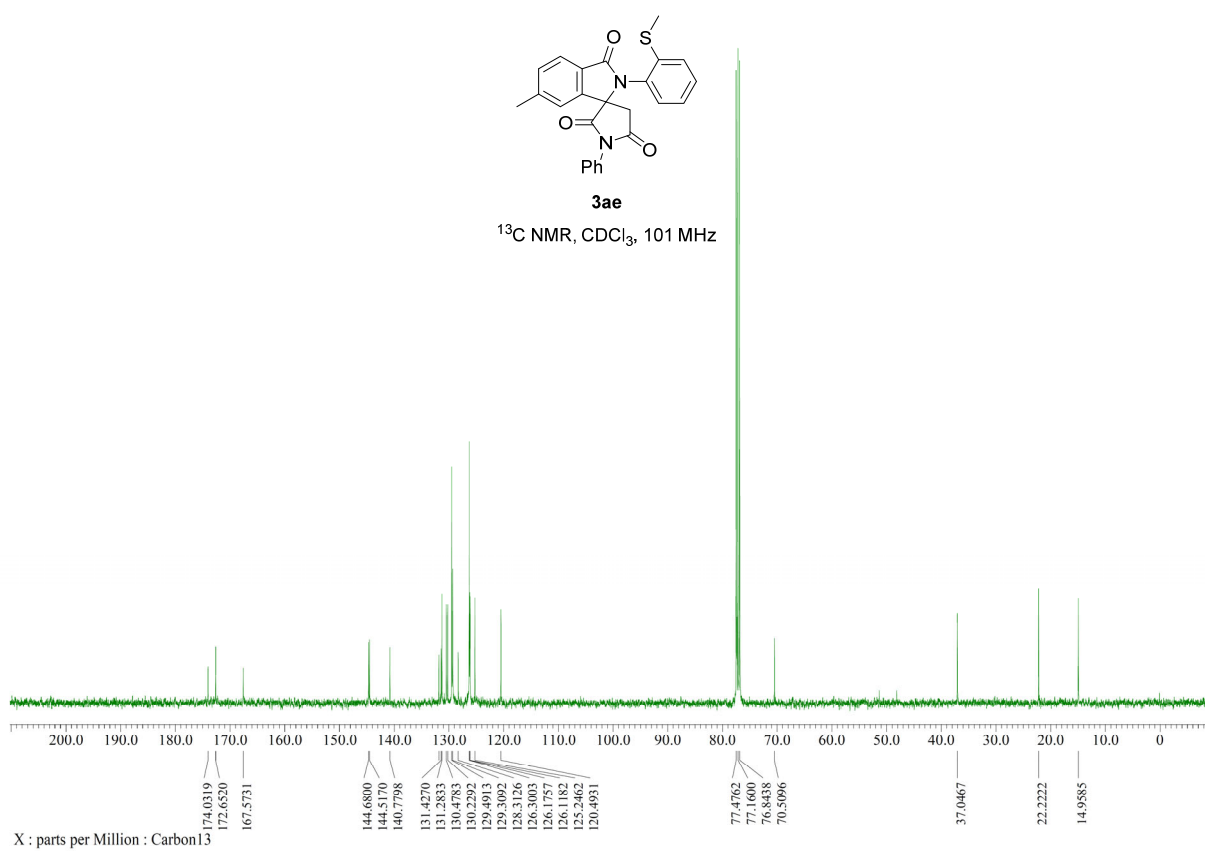

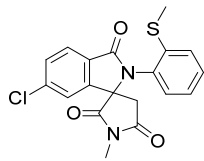

**3ba**

$^1\text{H NMR}$ ,  $\text{CDCl}_3$ , 400 MHz

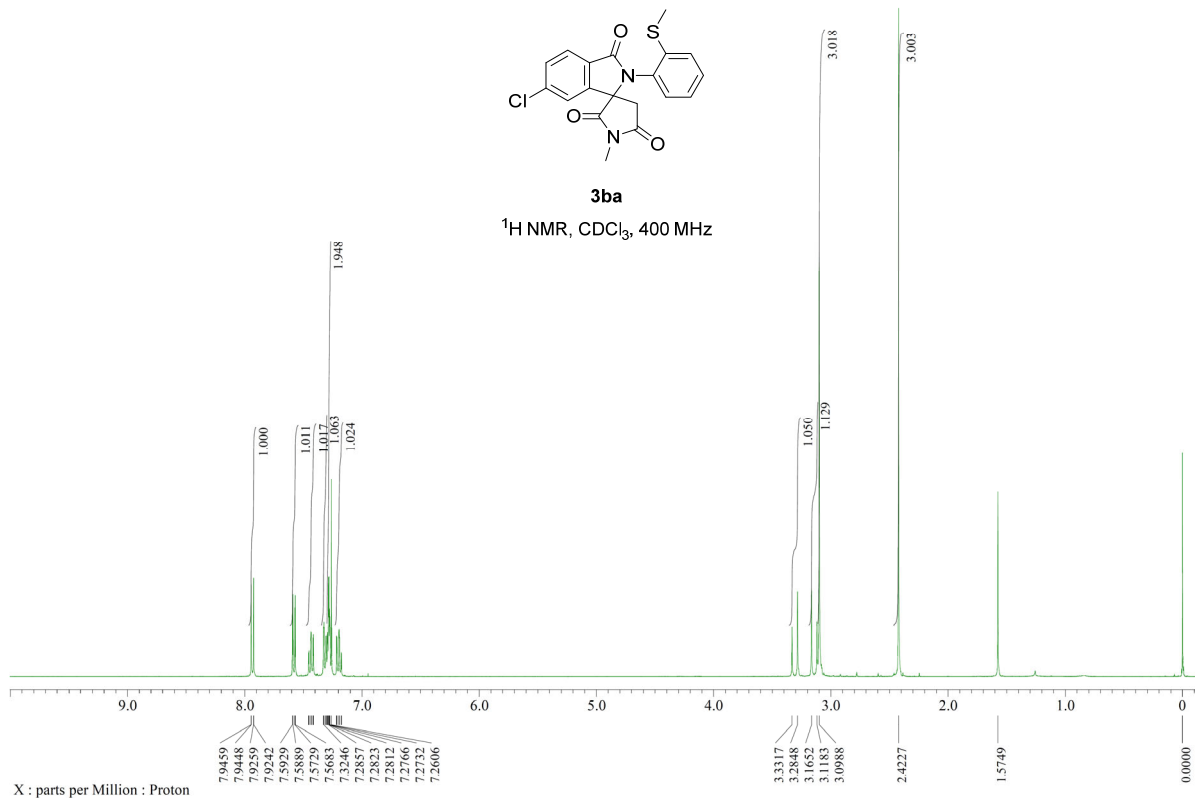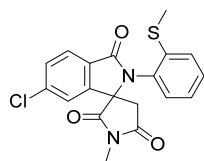

**3ba**

$^{13}\text{C NMR}$ ,  $\text{CDCl}_3$ , 101 MHz

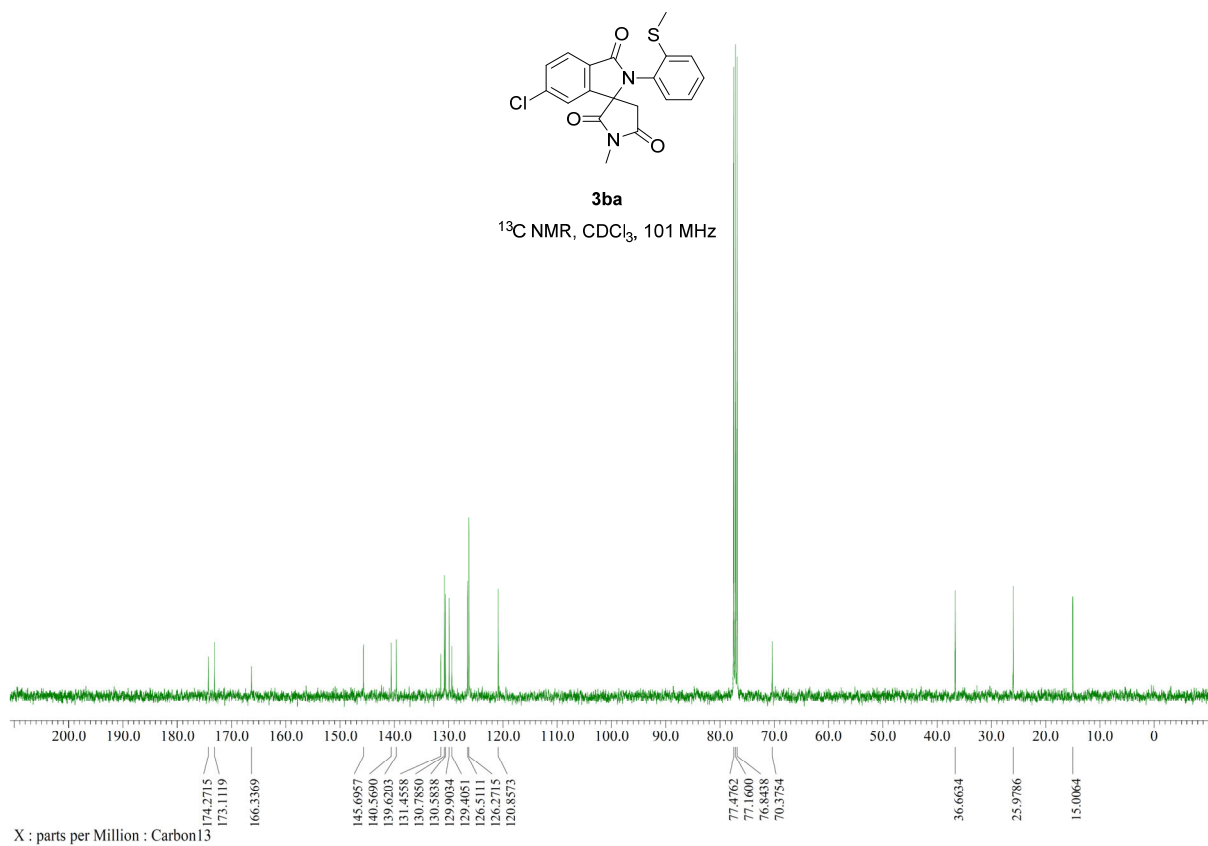

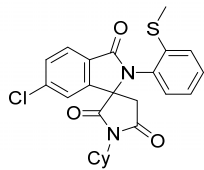

**3bd**

$^1\text{H NMR}$ ,  $\text{CDCl}_3$ , 400 MHz

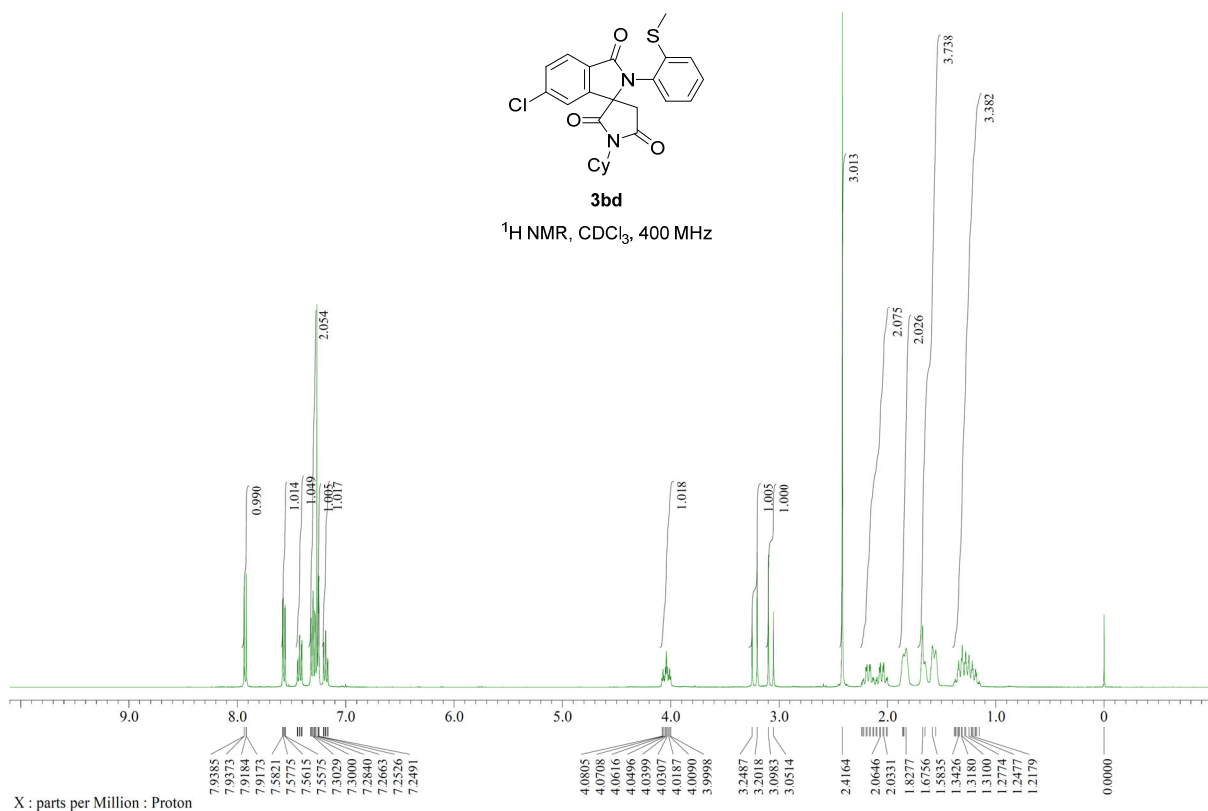

X : parts per Million : Proton

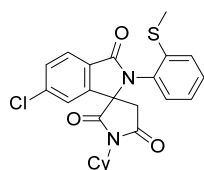

**3bd**

$^{13}\text{C NMR}$ ,  $\text{CDCl}_3$ , 101 MHz

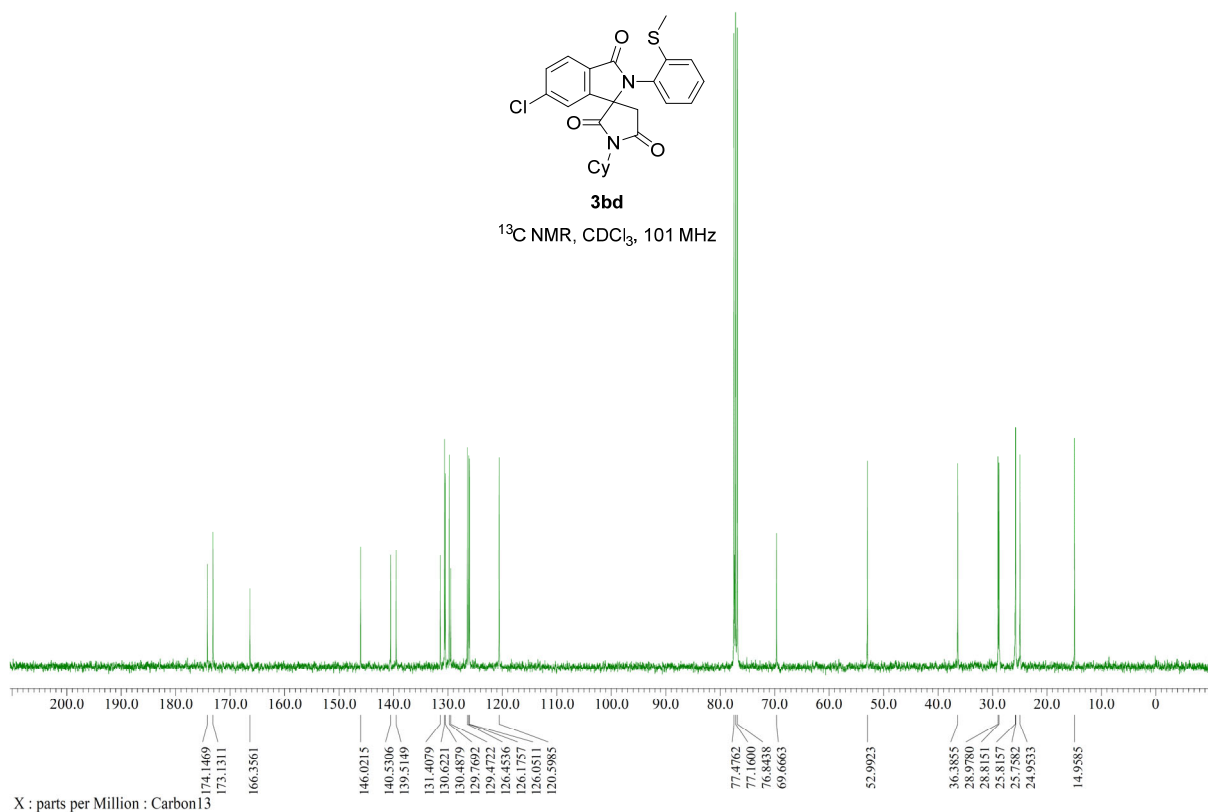

X : parts per Million : Carbon13



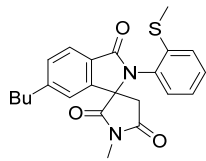

**3ca**

$^1\text{H NMR}$ ,  $\text{CDCl}_3$ , 400 MHz

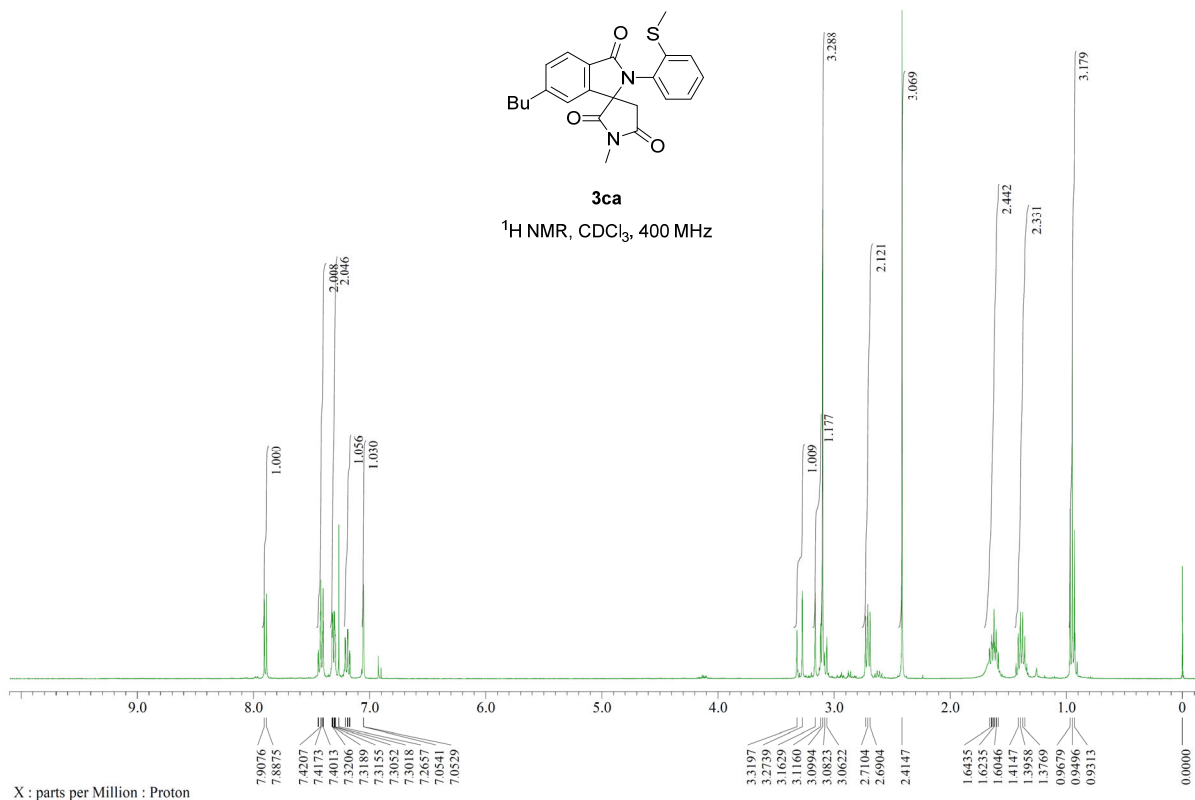

X : parts per Million : Proton

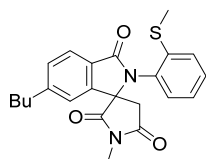

**3ca**

$^{13}\text{C NMR}$ ,  $\text{CDCl}_3$ , 101 MHz

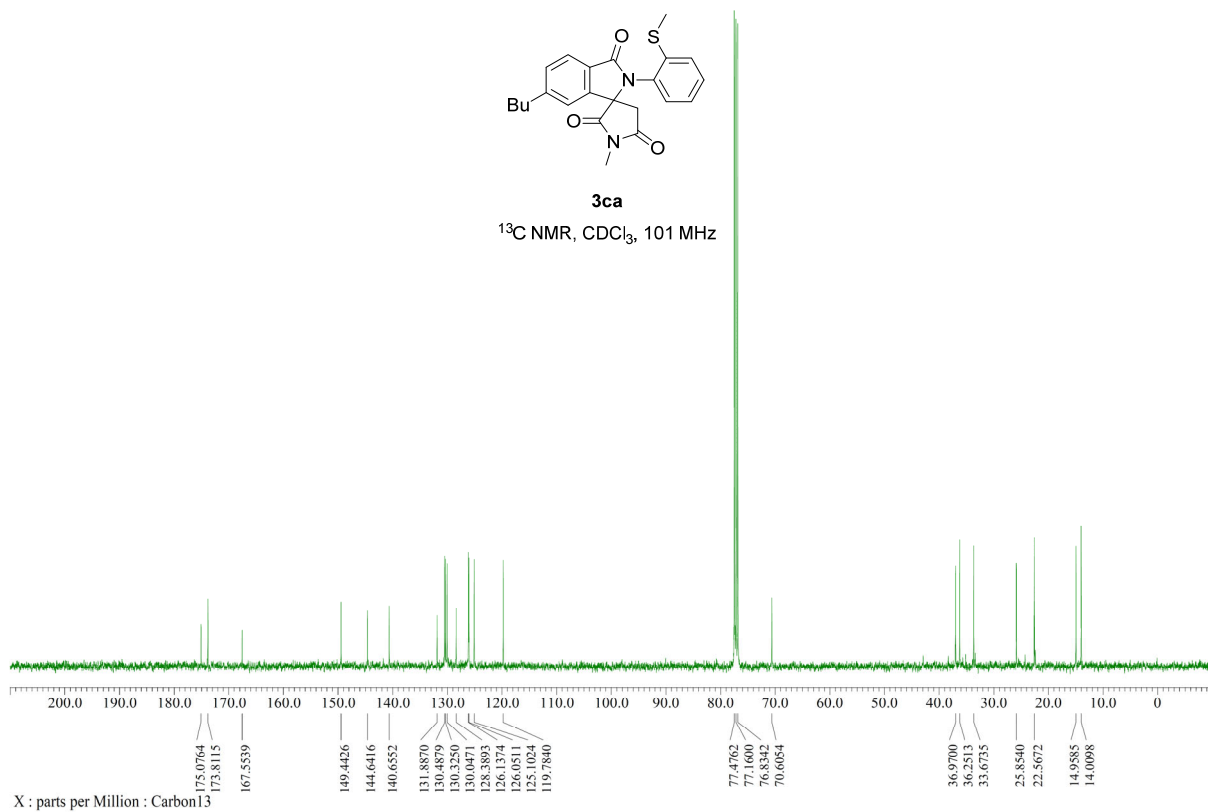

X : parts per Million : Carbon13

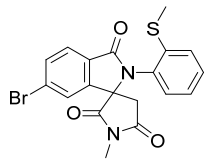

**3da**

$^1\text{H NMR}$ ,  $\text{CDCl}_3$ , 400 MHz

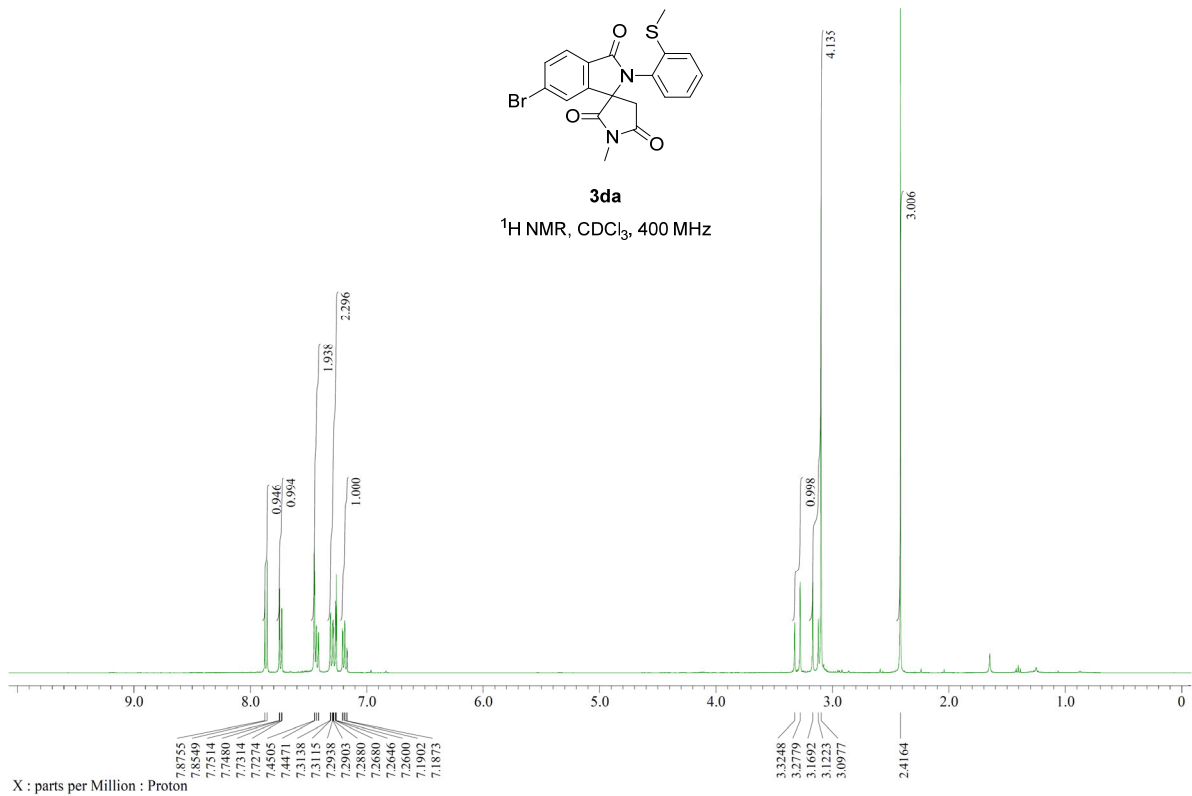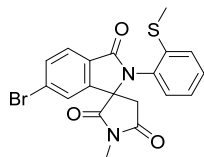

**3da**

$^{13}\text{C NMR}$ ,  $\text{CDCl}_3$ , 101 MHz

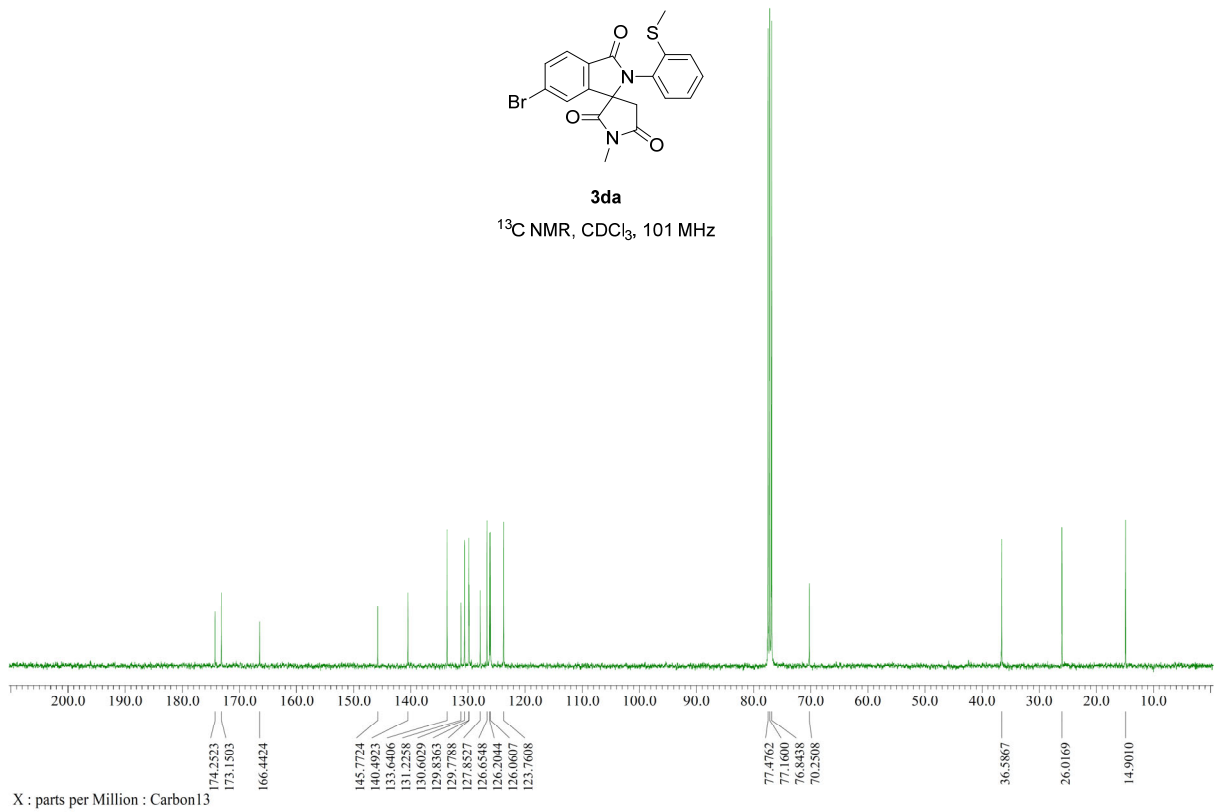

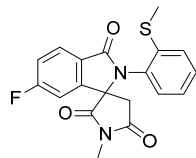

**3ea**

$^1\text{H NMR}$ ,  $\text{CDCl}_3$ , 400 MHz

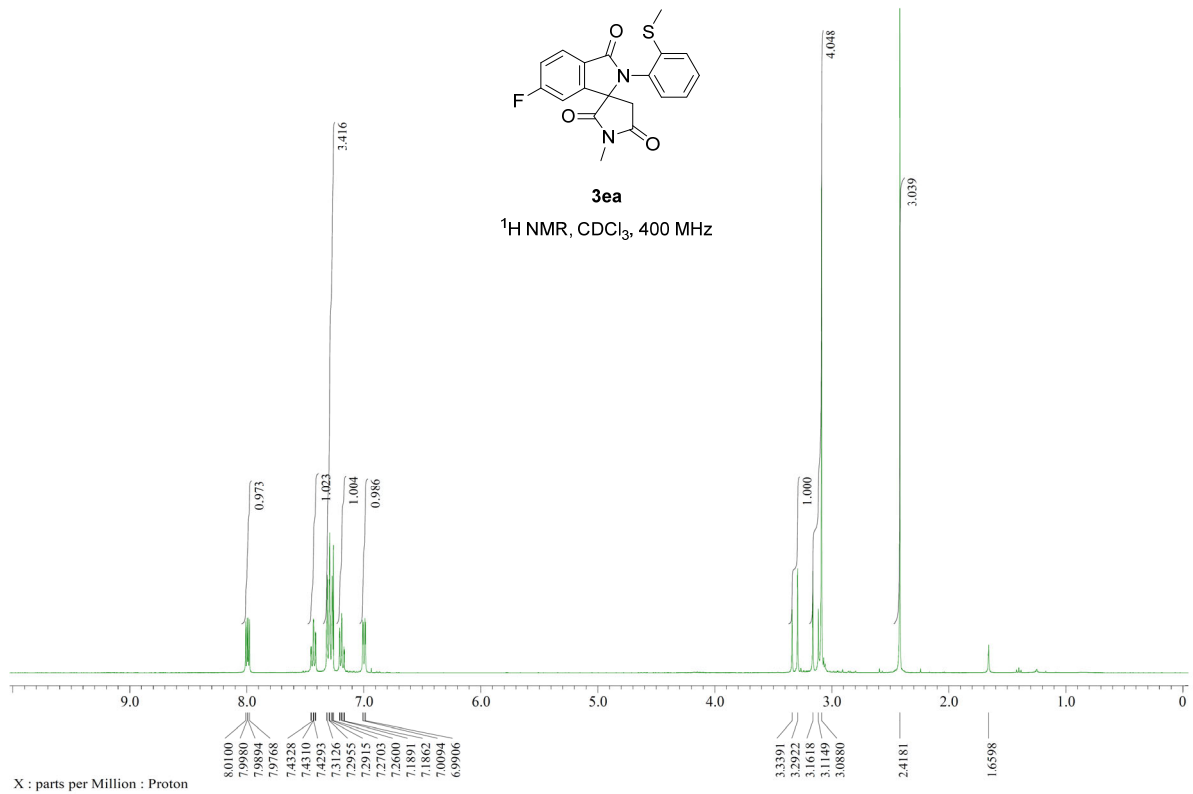

X : parts per Million : Proton

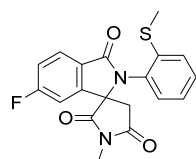

**3ea**

$^{13}\text{C NMR}$ ,  $\text{CDCl}_3$ , 101 MHz

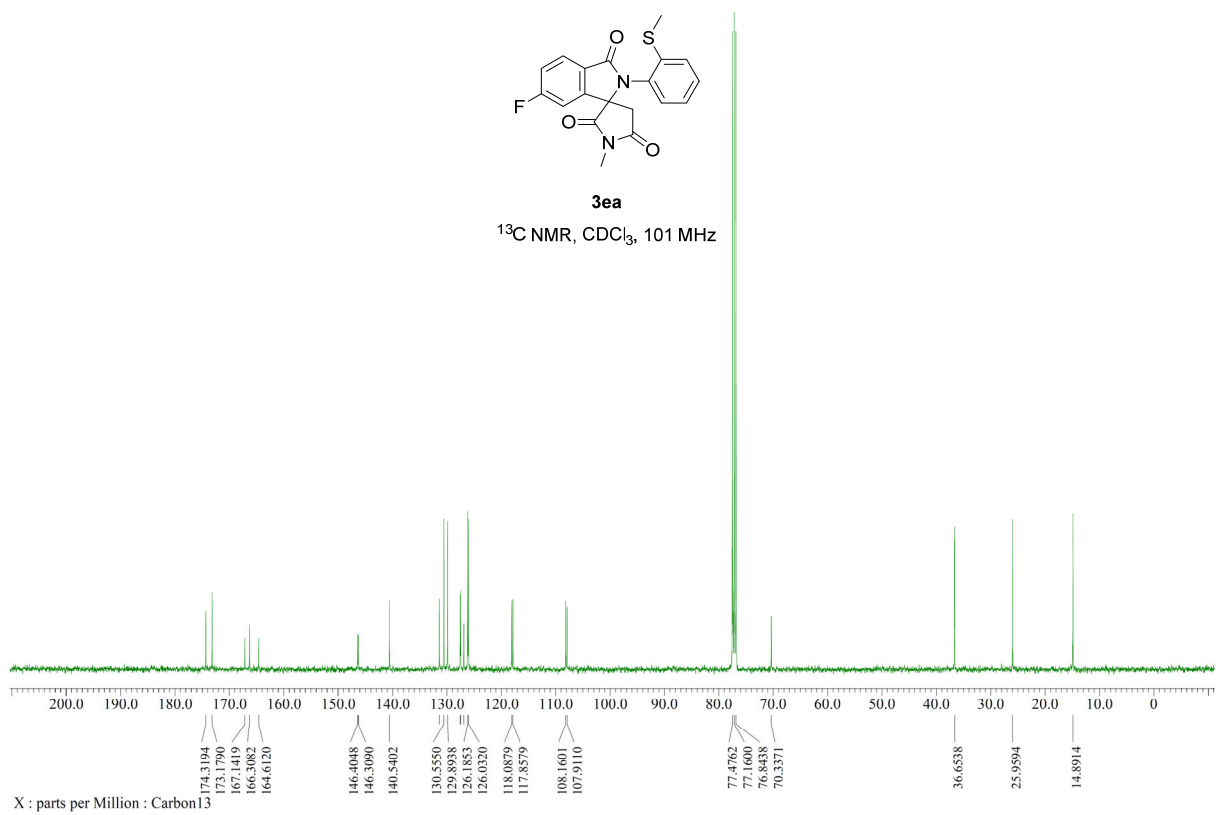

X : parts per Million : Carbon<sup>13</sup>

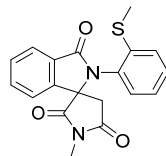

**3fa**

<sup>1</sup>H NMR, CDCl<sub>3</sub>, 400 MHz

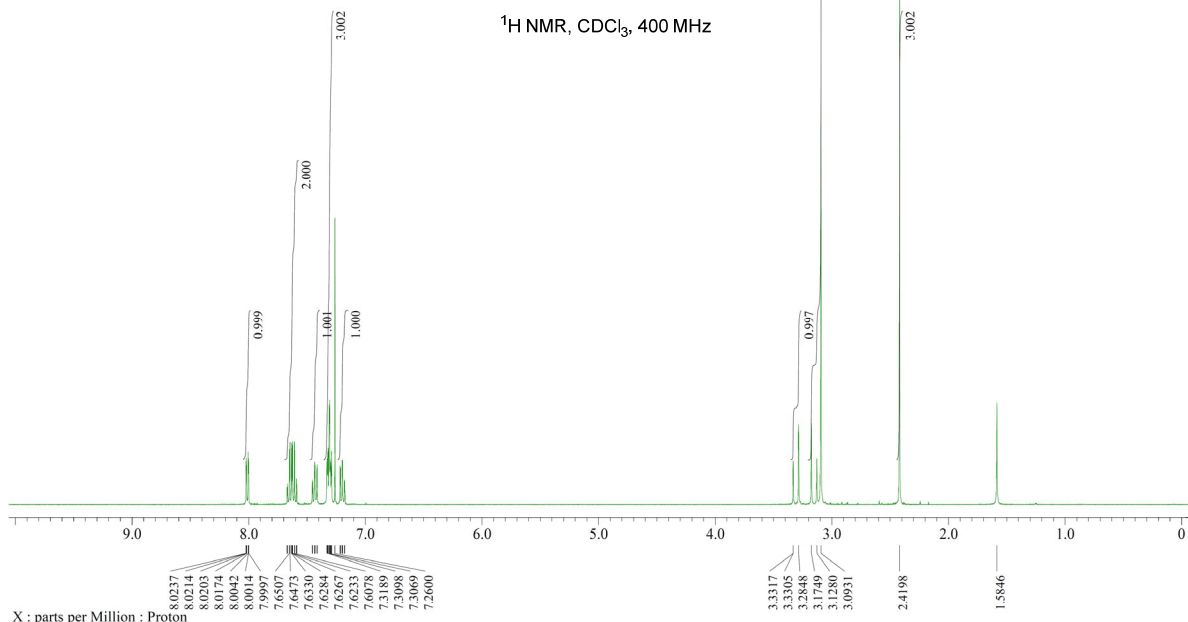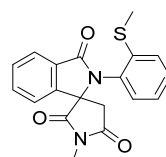

**3fa**

<sup>13</sup>C NMR, CDCl<sub>3</sub>, 101 MHz

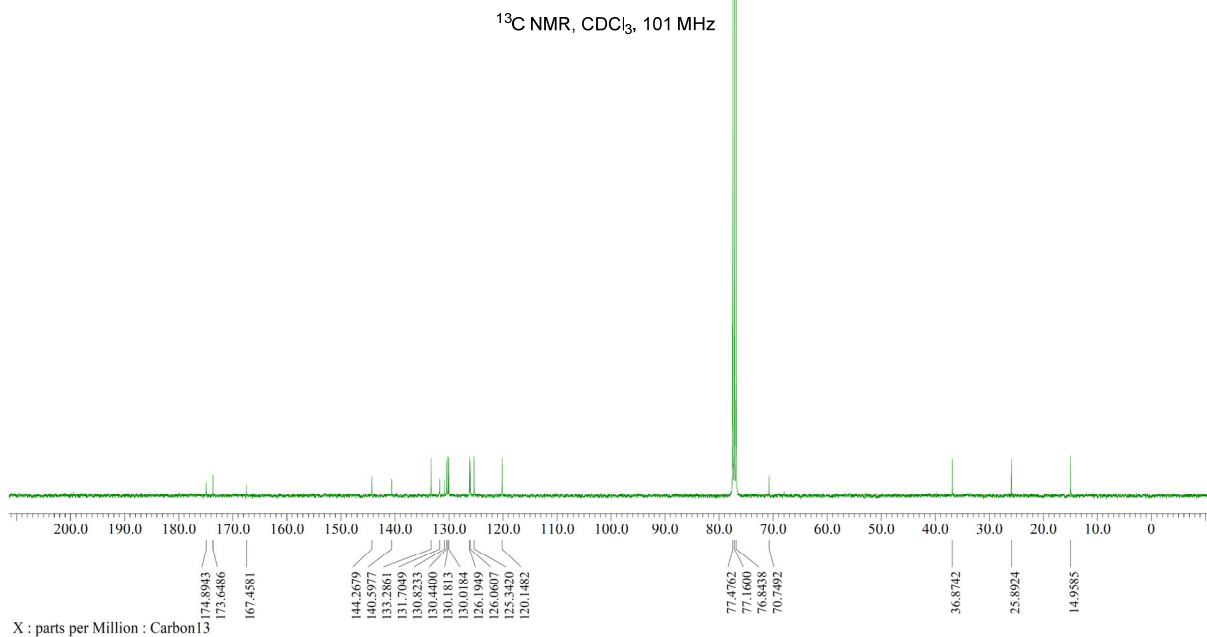

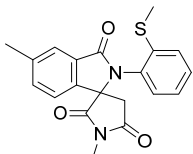

**3ga**

<sup>1</sup>H NMR, CDCl<sub>3</sub>, 400 MHz

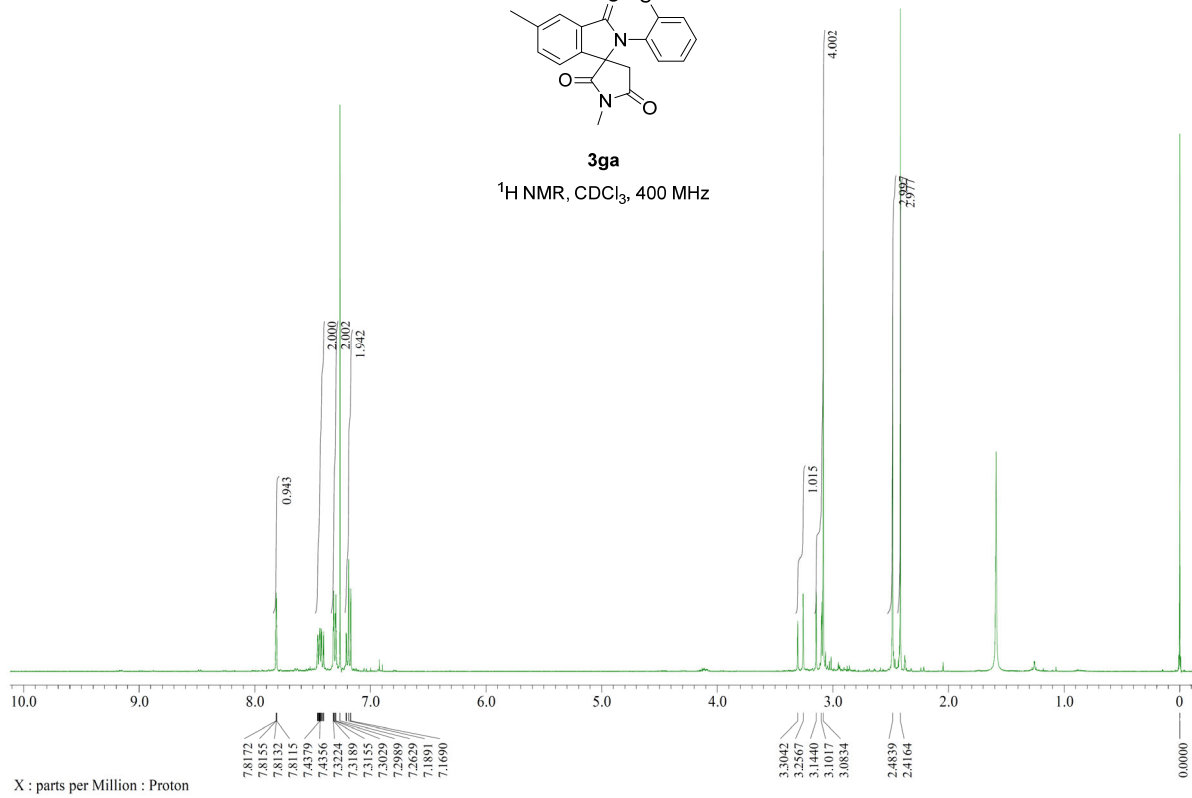

X : parts per Million : Proton

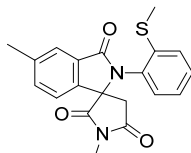

**3ga**

<sup>13</sup>C NMR, CDCl<sub>3</sub>, 101 MHz

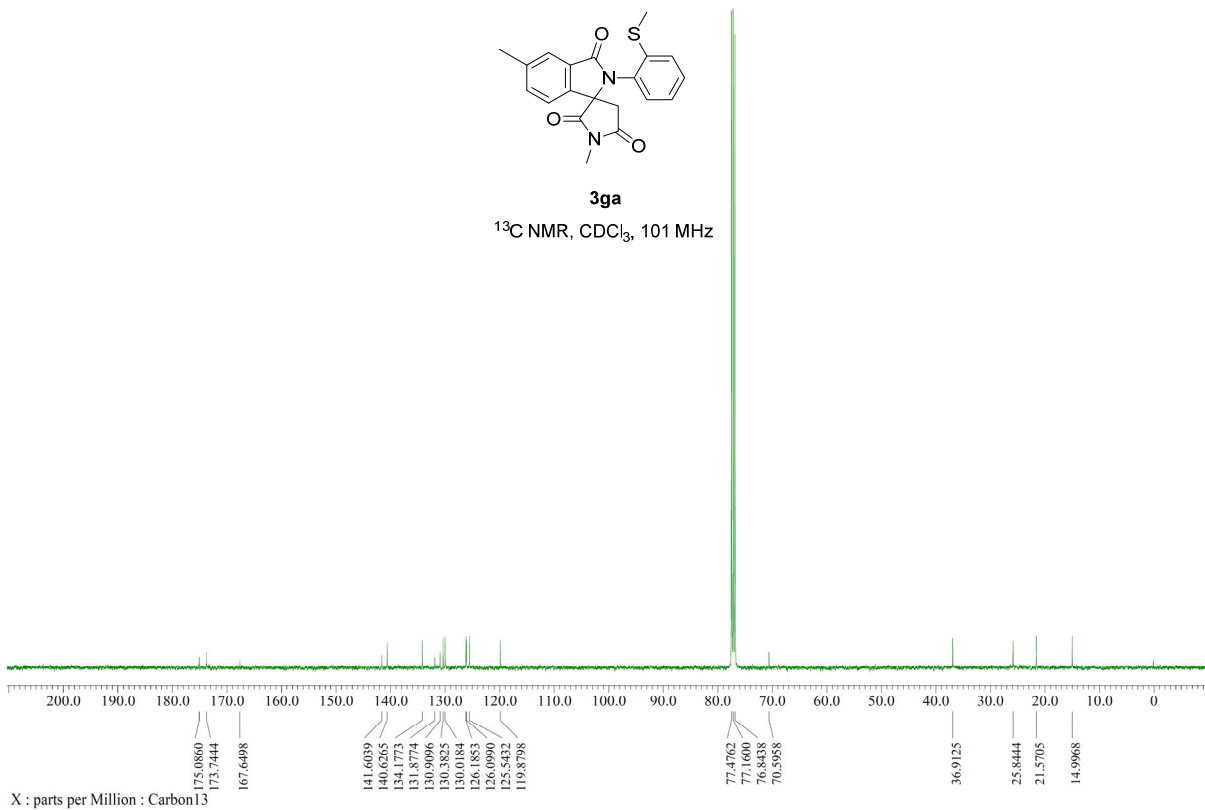

X : parts per Million : Carbon13

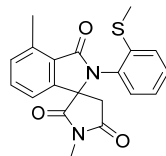

**3ha**

<sup>1</sup>H NMR, CDCl<sub>3</sub>, 400 MHz

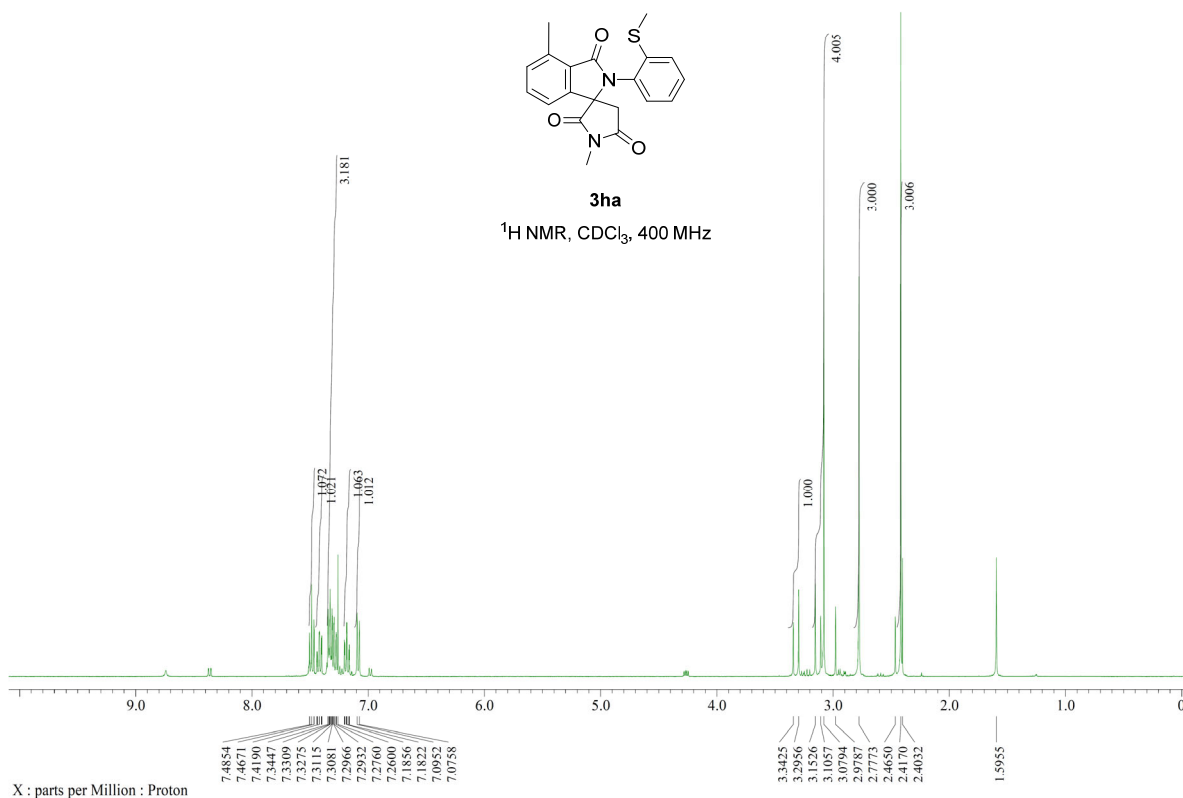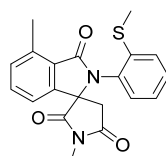

**3ha**

<sup>13</sup>C NMR, CDCl<sub>3</sub>, 101 MHz

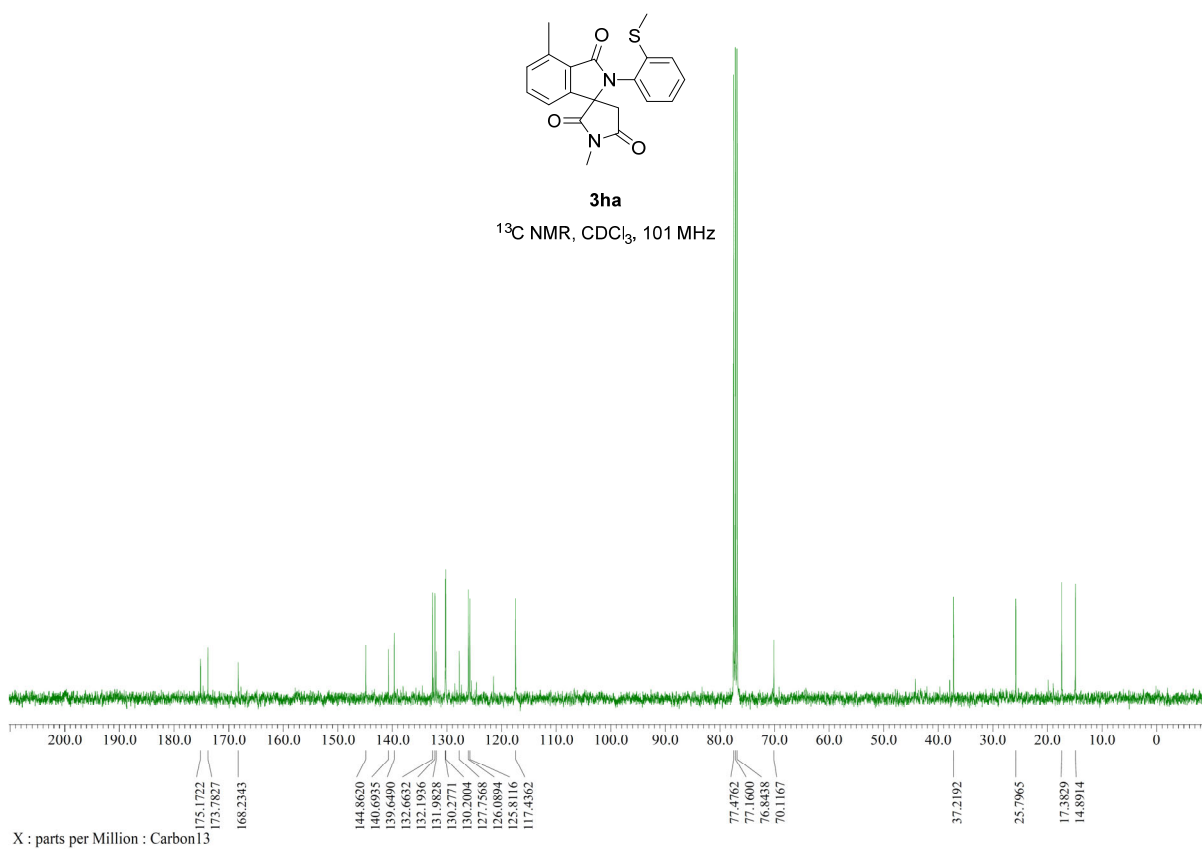

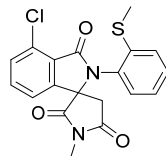

**3ia**

<sup>1</sup>H NMR, CDCl<sub>3</sub>, 400 MHz

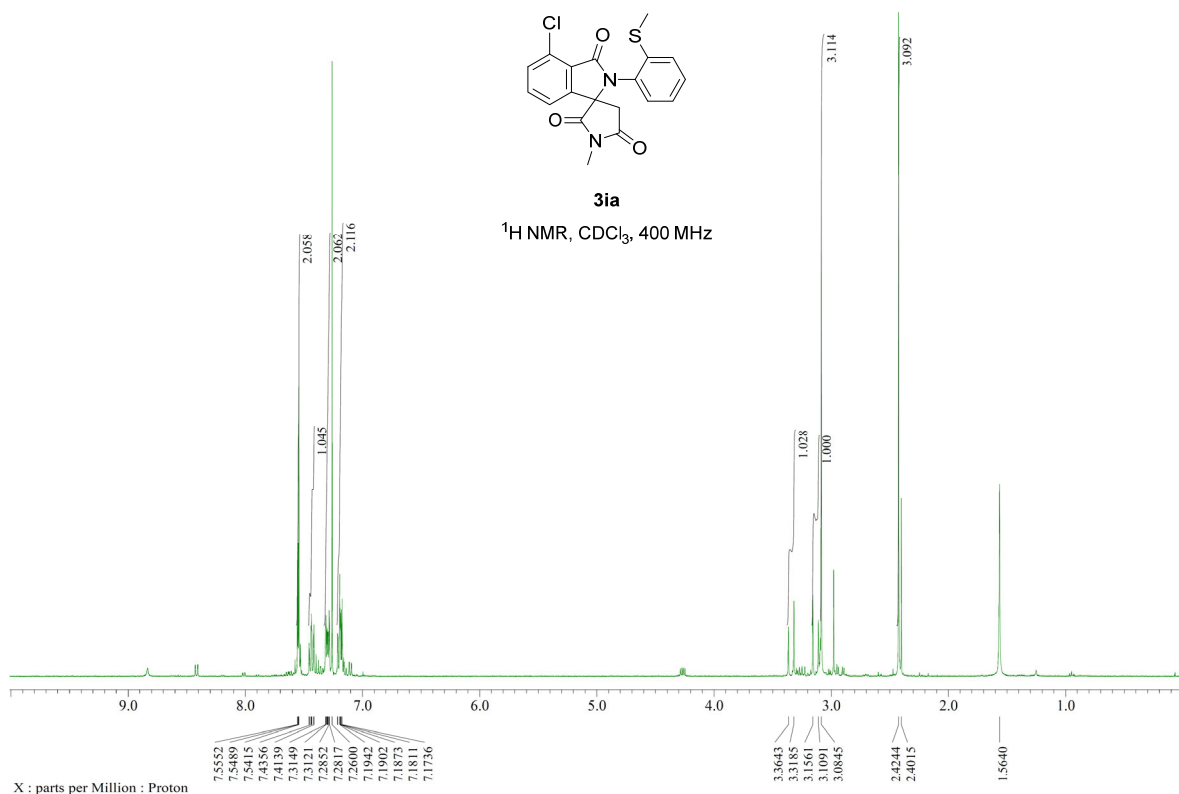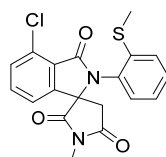

**3ia**

<sup>13</sup>C NMR, CDCl<sub>3</sub>, 101 MHz

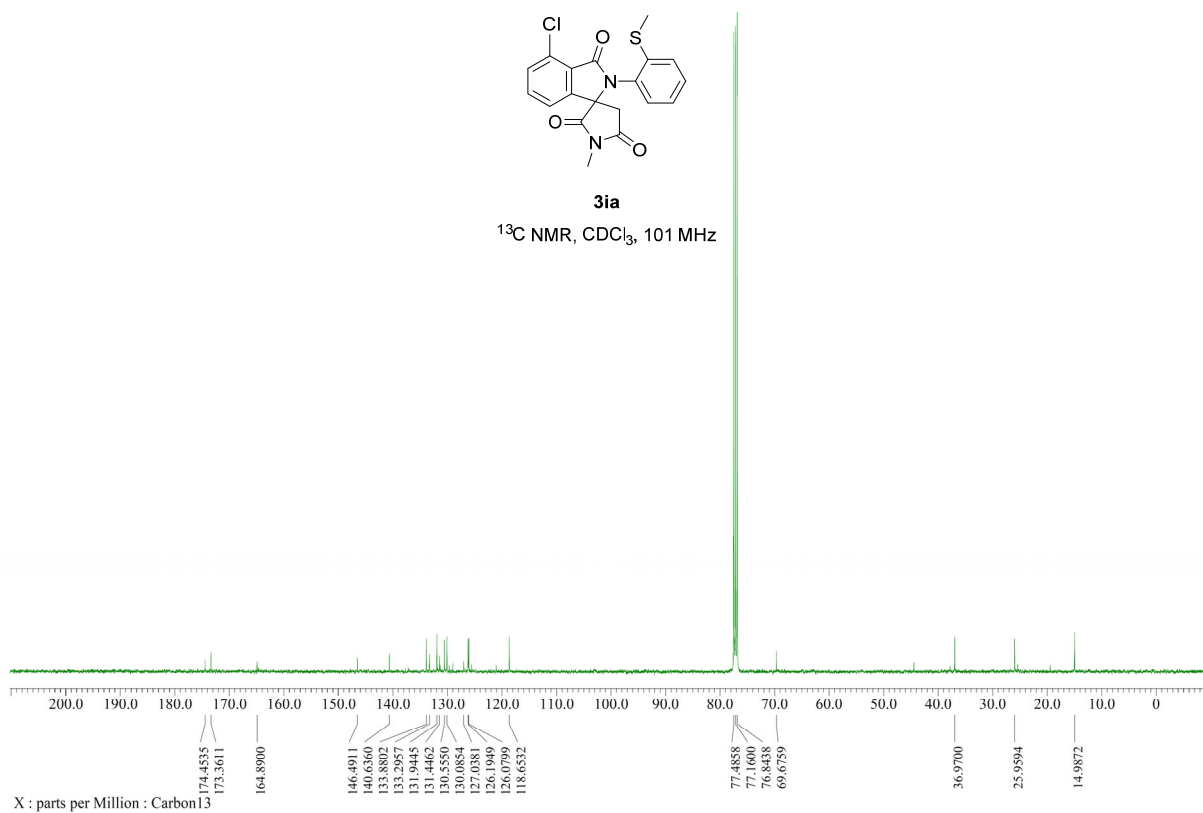

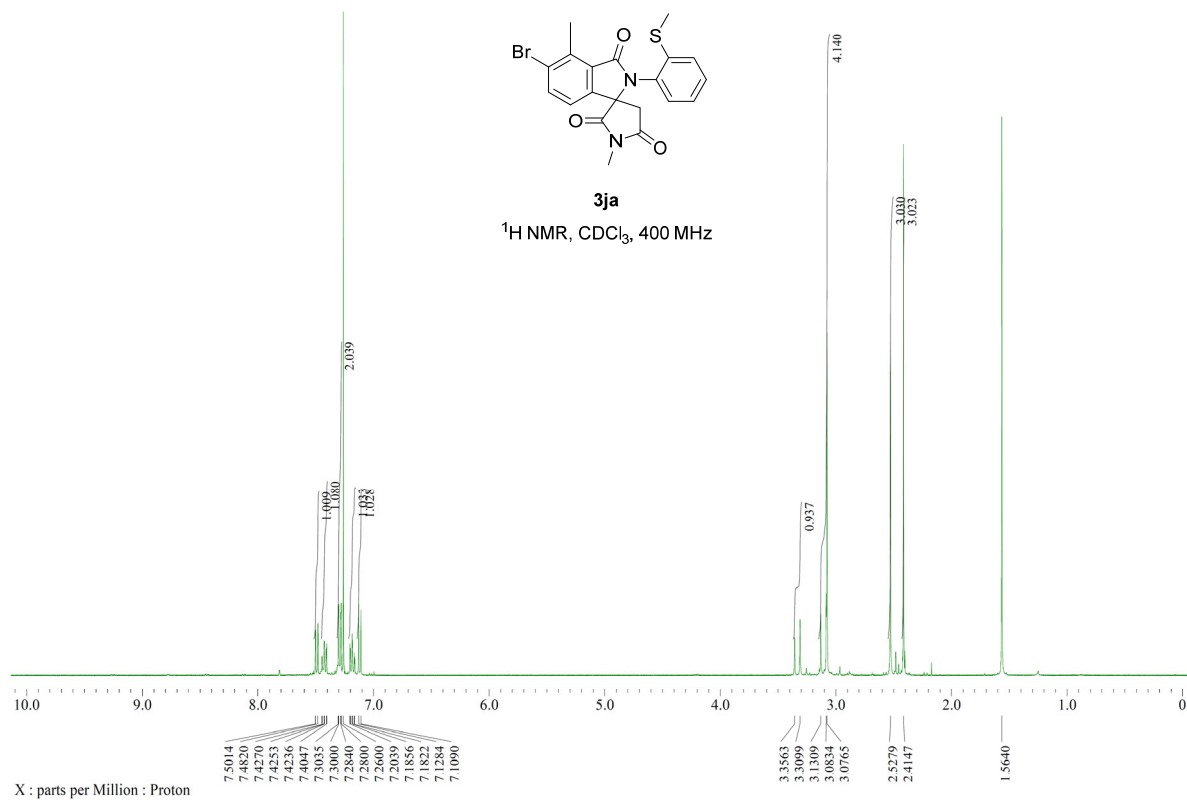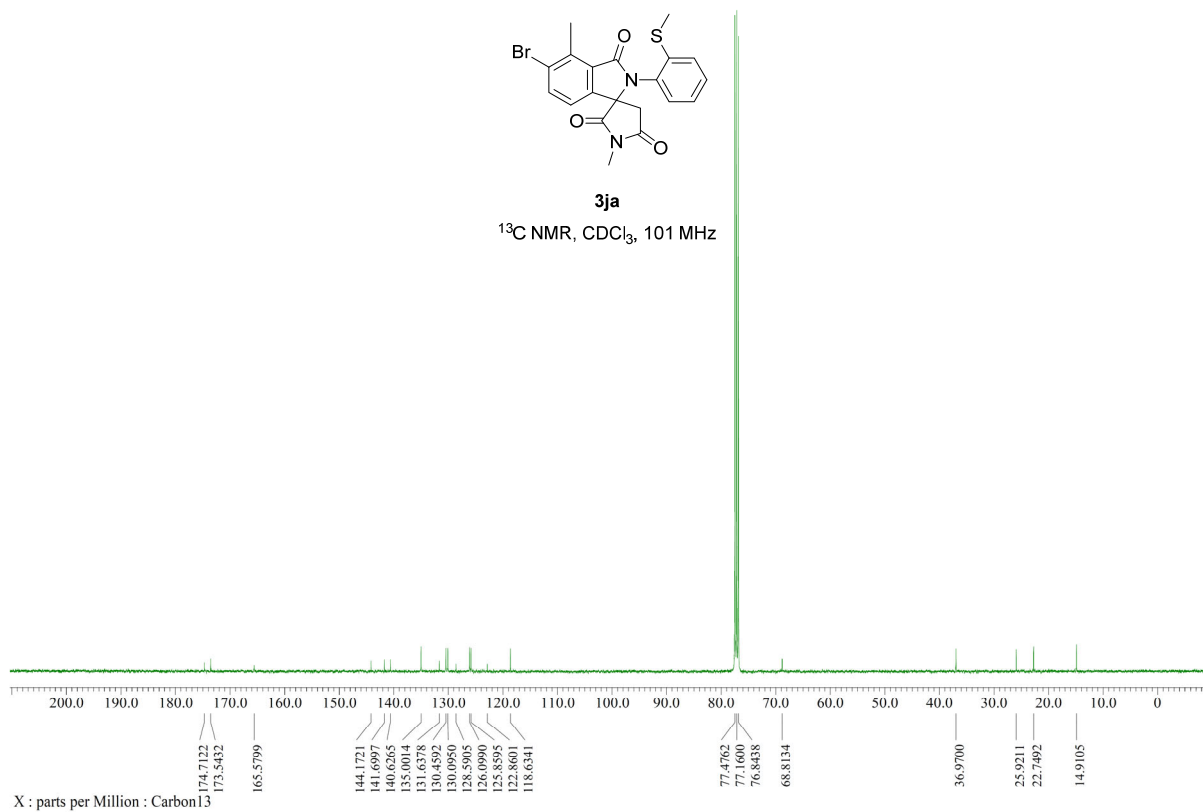



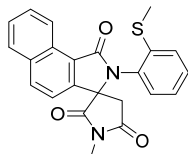

**3ka**

<sup>1</sup>H NMR, CDCl<sub>3</sub>, 400 MHz

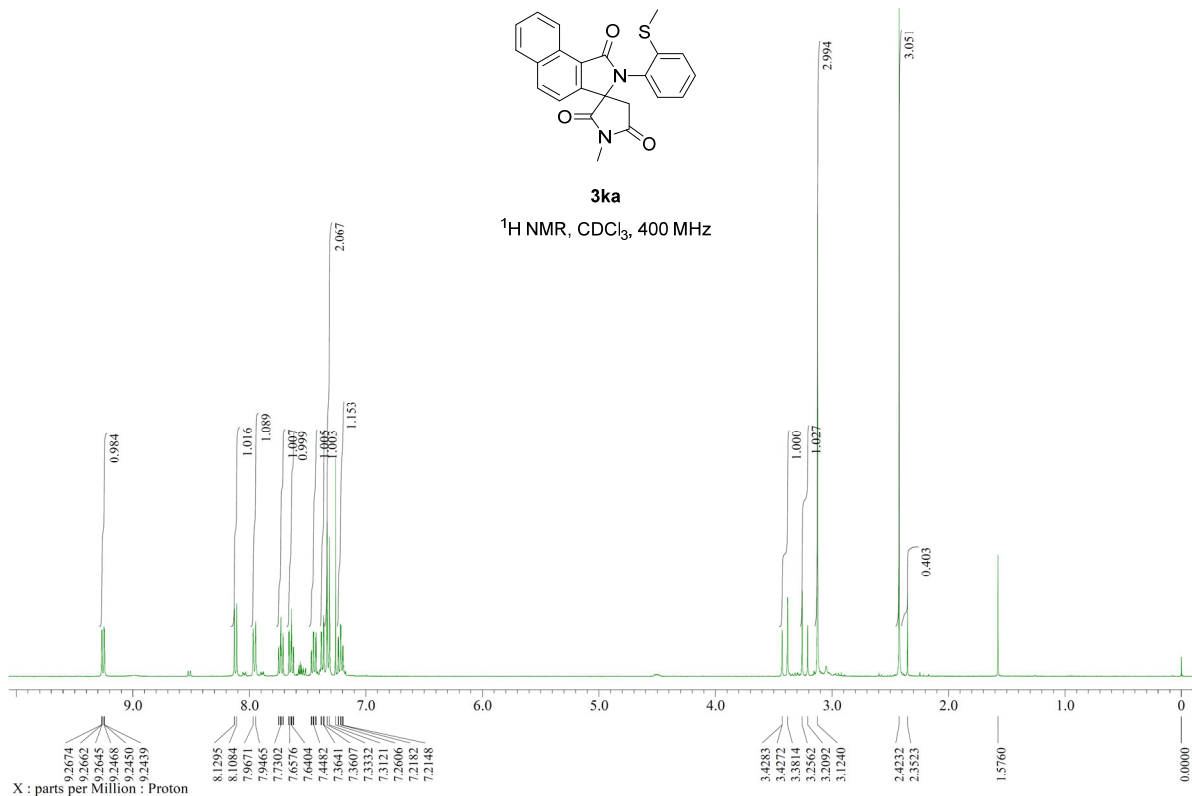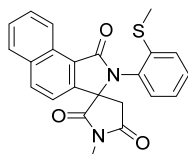

**3ka**

<sup>13</sup>C NMR, CDCl<sub>3</sub>, 101 MHz

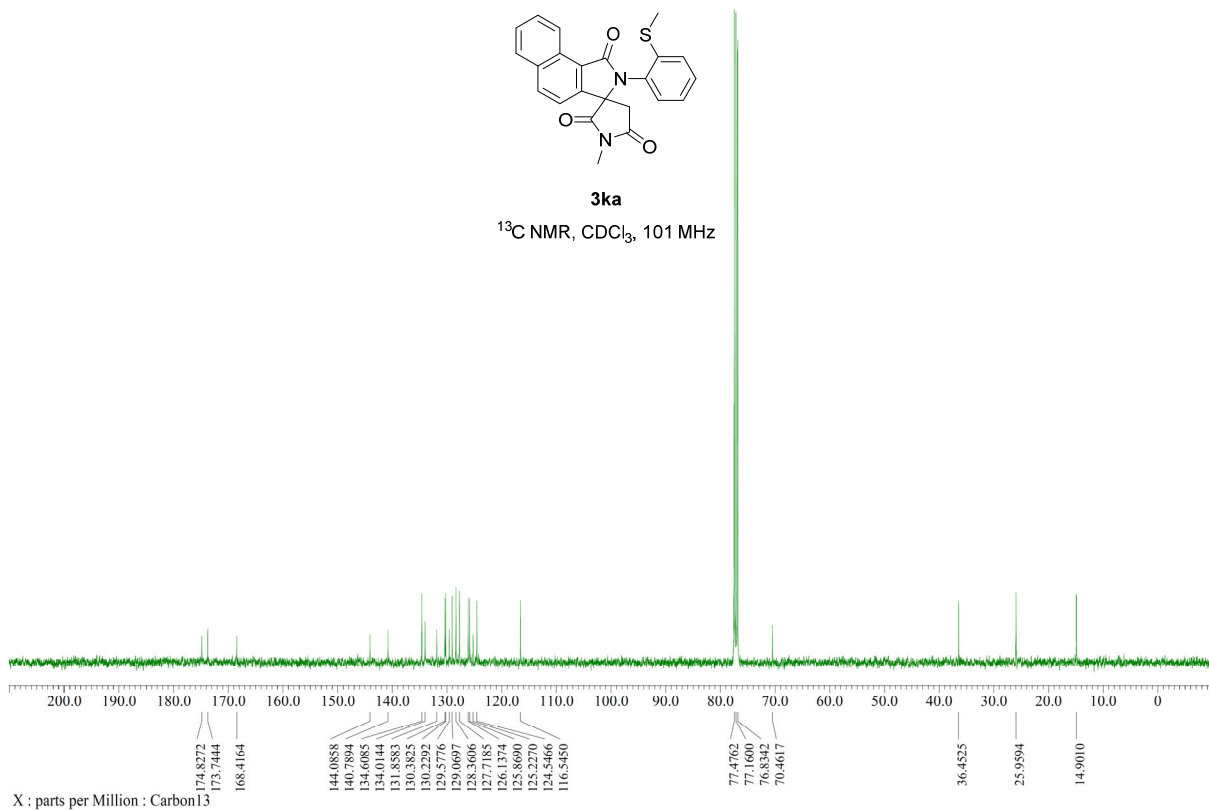

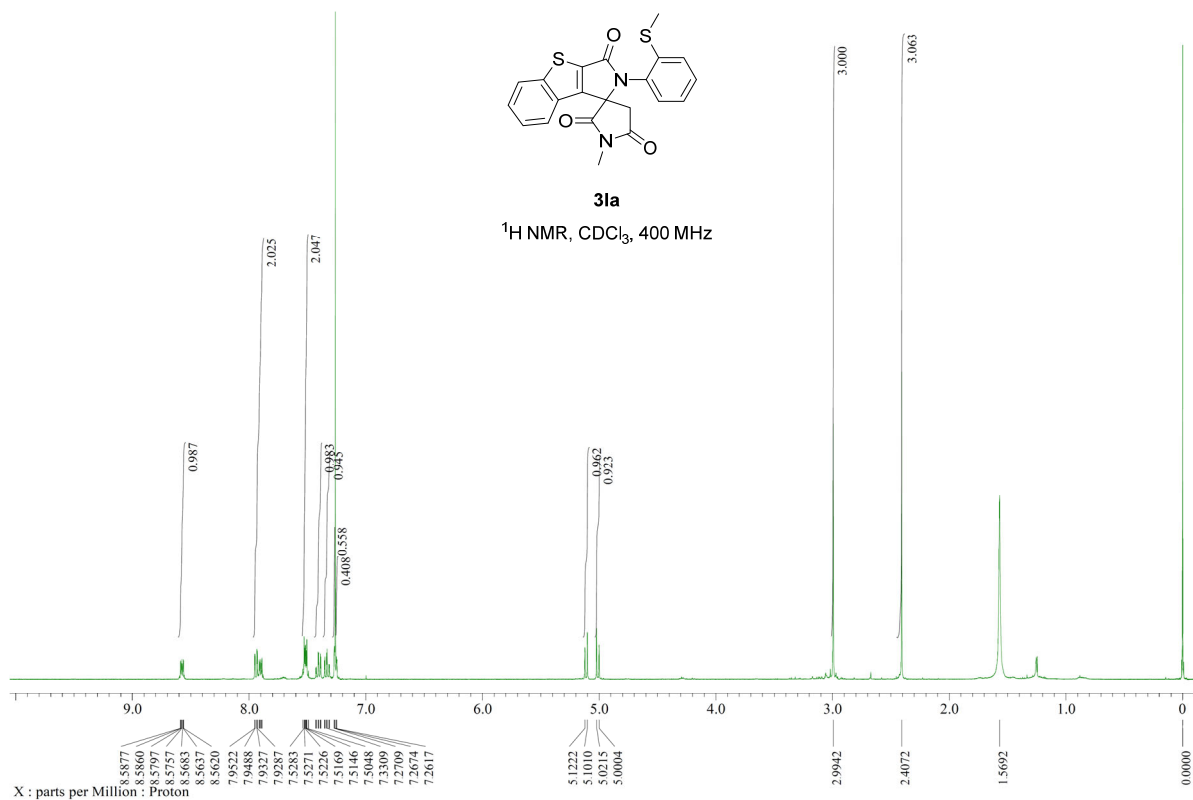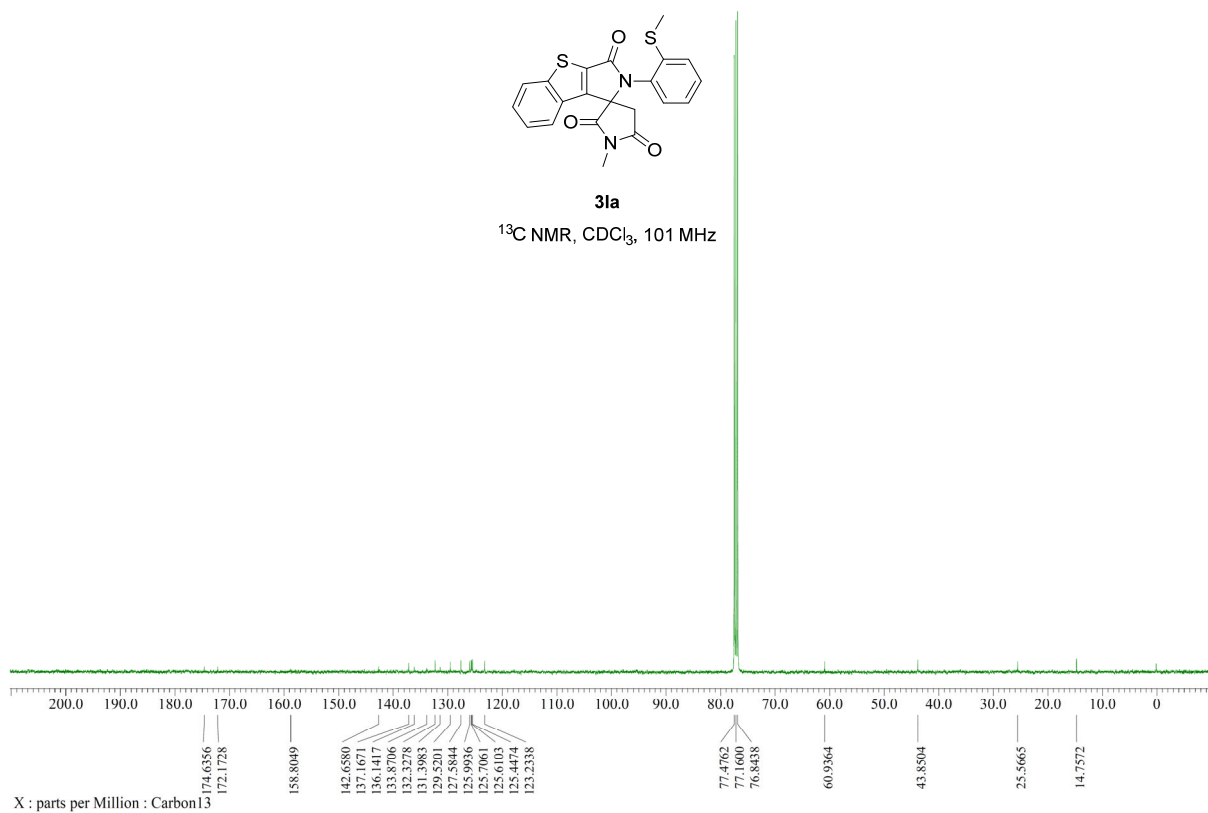

## IX. Computational details:

The reaction path of Rhodium(I)-catalyzed C–H alkylation of the 2-(methylthio)aniline aromatic amide with maleimide was investigated by Density Functional Theory (DFT) calculations, using the Gaussian 16<sup>6</sup> (Rev. A. 03) and Orca<sup>7</sup> (version 4.2.1) software packages. The B3LYP+D3BJ<sup>8-10</sup> and M06<sup>11</sup> functionals at the def2-SVP<sup>12</sup> level basis sets were employed to carry out lower level pre-geometry optimizations and conformational analyses. The final geometry optimization was performed at the M06/def2-TZVP/SMD<sup>13</sup> level using dielectric constant 2.3741 (toluene) and additional parameters to account for the solvent effect and at the DLPNO-CCSD(T)/def2-TZVP<sup>12,14</sup> level also. On all functionals and basis sets, the thermal corrections to the electronic energies had been estimated at 433.15 K (160°C) and 1 atm (to mimic the experimental conditions) using the normal coordinate analysis achieving the Gibbs free energies. The 1-methyl-2,5-pyrroledione was used as the representative of maleimide, 2-(methylthio)aniline as a directing group of aromatic amide, and Rh(COD)(OPiv) as the catalyst as in the experimental conditions. Transitional entropies have also been corrected using the method developed by Whitesides (W)<sup>15,16</sup>, and the concentration correction (cc) was also considered on the Gibbs free energy based on the experimental condition. The analysis of electron density was carried out with the quantum theory of atoms in molecules (QTAIM<sup>17</sup>), while further Mayer bond order (MBO<sup>18</sup>) analyses to clarify the nature of bonding and structure. Furthermore, the natural population analysis (NPA<sup>19</sup>) was applied to determine the atomic charges, and localized orbital bonding analysis (LOBA<sup>20</sup>) to determine the oxidation state of rhodium. The energy decomposition analysis (EDA<sup>21</sup>) was also performed to gain insight into the difference in the reaction paths' intermediate and transition state structures. These analyses were conducted with MultiWFN 3.7<sup>22</sup> and NBO 6.0<sup>23</sup> software. The energetic span model<sup>24</sup> and AUTOF<sup>25</sup> software were used to determine the rate-determining step, utilizing the TDTS (TOF-determining transition state), TDI (TOF-determining intermediate), and energetic span for the preferable reaction paths for the formation of isoindolone spirosuccinimides. The conformation analyses were carried out with the GFN2-xTB<sup>26</sup> (Density Functional Tight Binding) method applied in the xTB<sup>27</sup> software. The noncovalent interactions in the final products were evaluated by the NCI<sup>28</sup> method and visualized by the Chemcraft<sup>29</sup> software to explain the deuterium labeling experimental results. Furthermore, the Kinetic Isotopic Effect (KIE) was calculated by the python version of kinisot<sup>30</sup>.

## X. Whitesides correction and concentration correction:

The Sackur-Tetrode equation ( $S_{trans}$ ) fails in the assumption that molecules have no volume, which is reasonable in the gas phase, where the volume occupied by molecules is very small compared to the total volume. Thus, the translation entropy correction in the solution can be applied with the following equation:

$$S_{trans}^{corr} = S_{trans} + R \ln V_{free}$$
$$V_{free} = C_{free} \left( \sqrt[3]{\left(\frac{10^{27}}{[X]N_A}\right)} - \sqrt[3]{V_{molec}} \right)^3$$

whereas  $V_{free}$  is the “free volume”,  $C_{free}$  is 8,  $N_A$  is the Avogadro’s number ( $6.022 \times 10^{23} \text{ mol}^{-1}$ ), while the density of toluene at  $25^\circ\text{C}$  is  $0.8623 \text{ g/cm}^3$  and  $M$  is  $92.14 \text{ g/mol}$ , therefore the  $[X] = 9.3585 \text{ mol/L}$ . The volume of the molecule (Table S2,  $V_{mol}$ ) on the different levels of theory was obtained from Gaussian 16 simulations, and  $V_{molec}$  was calculated with  $V_{molec} = V_{mol}/N_A$  equation.

### 1. Table S7: The values of the Whitesides correction of translational entropy

|                                                 | B3LYP+D3BJ/<br>def-2SVP | M06/<br>def2-SVP | M06/<br>def2-TZVP |
|-------------------------------------------------|-------------------------|------------------|-------------------|
| $V_{mol} [\text{cm}^3]$                         | 83.96                   | 82.95            | 83.78             |
| $V_{molec} [\text{Å}^3]$                        | 139                     | 138              | 139               |
| $V_{free} [\text{Å}^3]$                         | 3.72                    | 3.54             | 3.89              |
| $R \ln V_{free} [\text{kJ/mol} \cdot \text{K}]$ | 0.0109                  | 0.0113           | 0.0109            |

Experimental conditions

$$C_{2\text{-met}} = 0.1 \text{ mmol}, C_{\text{mal}} = 0.3 \text{ mmol}, C_{\text{Rh(I)}} = 0.01 \text{ mmol (5 mol\%)}, \text{toluene (1 equiv)}$$

Gibbs free energy concentration correction

$$C_{2\text{-met}} = 0.1 \text{ M}, C_{\text{mal}} = 0.3 \text{ M}, C_{\text{prod}} = 0.9 \text{ M (90\% yield)}$$

$$G_{\text{corr}} = 2.303 RT \log_{10} K, K = [C_{\text{prod}} / (C_{2\text{-met}} C_{\text{mal}})]$$

$$R = 8.314\text{E-}03 [\text{kJ/mol K}], T = 433.15 [\text{K}]$$

$$G_{\text{corr}} = -4.0 [\text{kJ/mol}]$$

## XI. Energy decomposition analysis (EDA)

A simple energy decomposition analysis (EDA), based on the work of Kitaura and Morokuma, was performed with the combination of the two A and B fragments' wavefunction from the optimized AB structure and the total energy variation of forming complex was determined with the following equation:

$$\Delta E_{int} = E_{AB} - (E_A + E_B) = \Delta E_{steric} + \Delta E_{orb}$$

where  $\Delta E_{steric}$  consists of the electrostatic interaction and exchange repulsion term and  $E_{orb}$  is the orbital interaction term, which is sometimes known as the induction or polarization term. The  $\Delta E_{orb}$  and  $\Delta E_{steric}$  can be determined with the following equations:

$$\Delta E_{orb} = E_{SCF,last} - E_{SCF,1st}$$

$$\Delta E_{steric} = \Delta E_{int} - \Delta E_{orb}$$

Furthermore, the dispersion interaction ( $\Delta E_{disp}$ ) was also determined with the difference of B3LYP/def2-SVP and B3LYP+D3/def2-SVP single point energy calculations on the optimized AB structure.

### 2. Figure S1: The fragmentation for the energy decomposition analysis of the structures involved in the OA/MI, LLHT and CCBF paths.

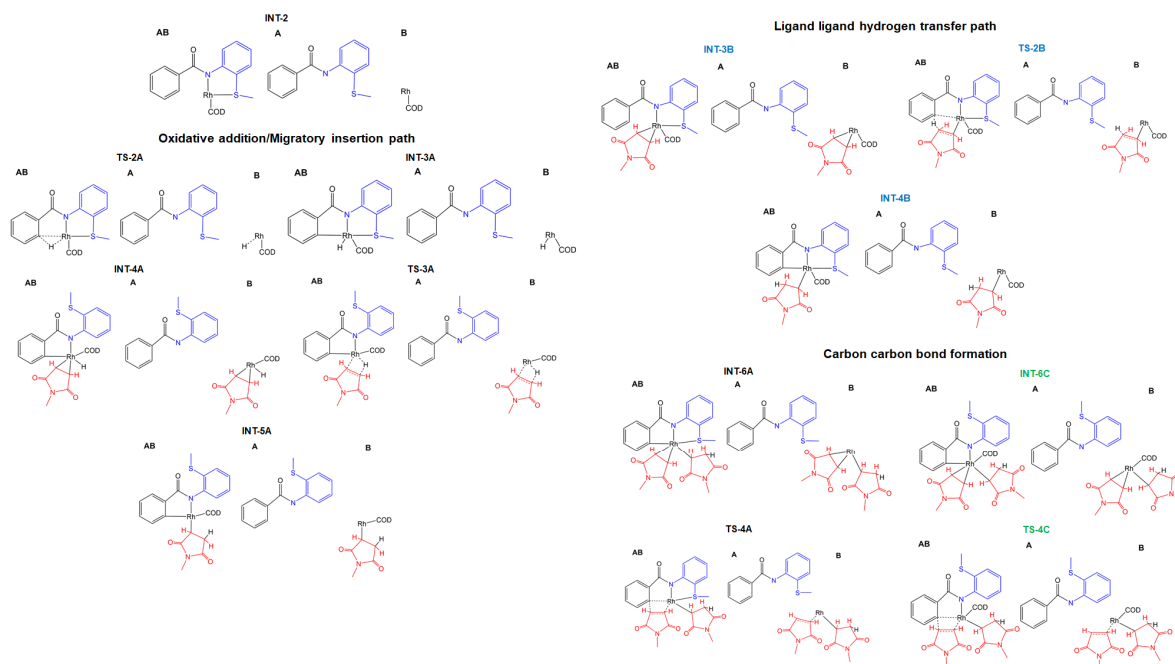

**3. Table S8: The energy decomposition analysis of the structures involved in the OA/MI, LLHT and CCBF paths.**

|        | $E_A$<br>(a.u.) | $E_B$<br>(a.u.) | $E_{AB}$<br>(a.u.) | $\Delta E_{\text{int}}$<br>(kJ/mol) | $\Delta E_{\text{orb}}$<br>(kJ/mol) | $\Delta E_{\text{steric}}$<br>(kJ/mol) | $\Delta E_{\text{disp}}$<br>(kJ/mol) |
|--------|-----------------|-----------------|--------------------|-------------------------------------|-------------------------------------|----------------------------------------|--------------------------------------|
| INT-2  | -1068.2649      | -422.4677       | -1491.2005         | -1228                               | -1473                               | 245                                    | -375                                 |
| TS-2A  | -1067.8358      | -423.0182       | -1491.1278         | -719                                | -1225                               | 506                                    | -392                                 |
| INT-3B | -1068.2782      | -821.2125       | -1889.8589         | -967                                | -1104                               | 138                                    | -506                                 |
| INT-3A | -1067.8439      | -423.0174       | -1491.1576         | -778                                | -1160                               | 382                                    | -398                                 |
| TS-2B  | -1067.8545      | -821.6843       | -1889.7798         | -633                                | -1519                               | 886                                    | -522                                 |
| INT-4A | -1067.8596      | -821.7358       | -1889.8227         | -597                                | -916                                | 319                                    | -526                                 |
| INT-4B | -1067.8472      | -821.7729       | -1889.8682         | -651                                | -1021                               | 370                                    | -536                                 |
| TS-3A  | -1067.8556      | -821.7200       | -1889.8061         | -605                                | -919                                | 314                                    | -528                                 |
| INT-5A | -1067.8651      | -821.7654       | -1889.8328         | -531                                | -873                                | 342                                    | -500                                 |
| INT-6A | -1067.8534      | -908.5019       | -1976.6135         | -678                                | -1049                               | 371                                    | -465                                 |
| INT-6C | -1067.8493      | -1220.3913      | -2288.4553         | -564                                | -872                                | 309                                    | -650                                 |
| TS-4A  | -1067.8505      | -908.4840       | -1976.5887         | -667                                | -1369                               | 702                                    | -452                                 |
| TS-4C  | -1067.8501      | -1220.3900      | -2288.4530         | -559                                | -900                                | 341                                    | -652                                 |

## XII. Kinetic isotopic effect of the calculated reaction paths:

The kinetic isotopic effect (KIE) of the calculated reaction paths was determined using the kinisot python code. The determination of KIE was compared between INT-0 and TS-2A, TS-2B, TS-3A, TS-7C and TS-7D transition states. The temperature was set 433.15 K to reproduce the experimental conditions, while the scaling factor for vibrational frequencies was set to default (0.982) to apply automatically for the combination of functional/basis set (M06/def2-TZVP). Furthermore, the quantum mechanical tunnelling correction (1D-Tunn) is computed also.

### 1. Table S9: The theoretical kinetic isotopic effect determined for the most important transition states of the reaction paths.

|             | INT-0<br>TS-2A | INT-0<br>TS-2B | INT-0<br>TS-3A | INT-0<br>TS-7C | INT-0<br>TS-7D | Exp. |
|-------------|----------------|----------------|----------------|----------------|----------------|------|
| KIE         | 2.89           | 3.39           | 2.95           | 1.02           | 0.97           | 2.5  |
| KIE (corr.) | 3.36           | 9.31           | 3.12           | 1.02           | 0.97           | N/A  |

### **XIII. Conformational analysis of maleimide coordinated structures:**

Conformational analyses were carried out both reaction paths' (LLHT, OA/MI, CCBF) maleimide coordinated structures (INT-3B, INT-4B, INT-4A, INT-5A, INT-6A) to determine the energetically most preferable conformation structures. The GFN2-xTB method was used to perform the relaxed scan geometry optimizations to save computational time. The lowest energy structure of the relaxed scan was further optimized on the B3LYP+D3BJ/def2-SVP level. The more stable conformation structure had been used in the further reaction path determination. The N1-Rh-C6-C7 dihedral angle was scanned for INT-4A and INT-5A, while S-Rh-C6-C7 dihedral angle for INT-3B, INT-4B and INT-6A structures with 2° stepwise condition for the relaxed scan simulations (Figure S2). The relaxed scan of INT-3B did not conclude into a lower energy structure than the initial structure. However, in the other relaxed scan analyses for INT-4B, INT-4A, INT-5A and INT-6A, a lower energy structure had been found. The further geometry optimization with B3LYP+D3BJ/def2-SVP and energy comparison with the initial structure showed that all lower energy structures are global minima, therefore these structures were used for further computational simulations.



1. Figure S2: The fragmentation for the energy decomposition analysis of the structures involved in the OA/MI, LLHT and CCBF paths.

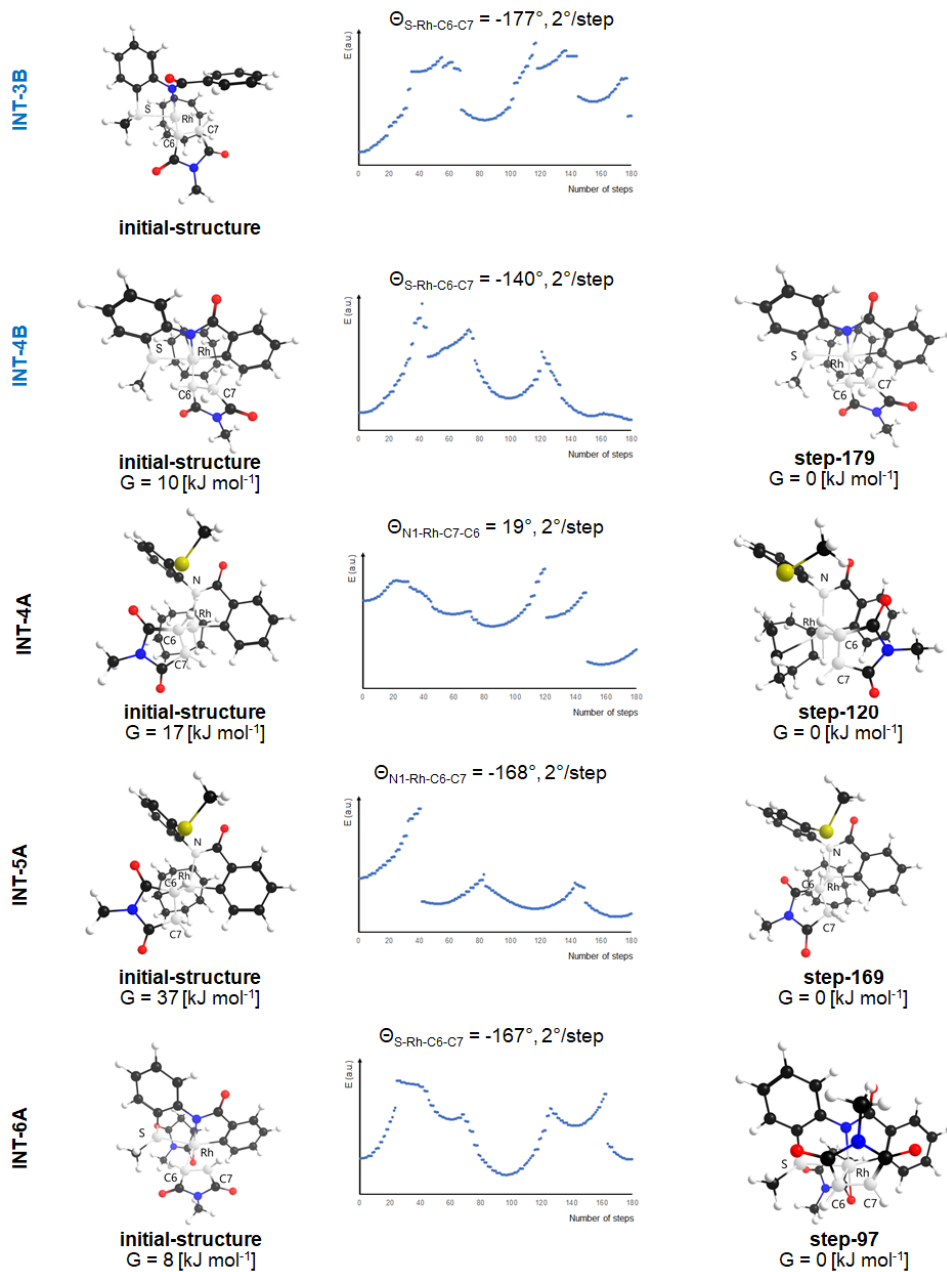

#### XIV. The usability of SMD single point calculations results

The single point energy calculations with M06/def2-TZVP/SMD on the geometry optimized M06/def2-TZVP gave some significant and some neglectable differences throughout the whole reaction path (Table S9), showing that the usage of SMD is crucial.

**1. Table S10: The relative Gibbs free energies of LLHT, OA/MI and CCBF pathways with a different selection of DFT (B3LYP+D3BJ, M06) and post-HF (DLPNO-CCSD(T)) methods with different basis sets (def-2SVP, def2-TZVP, def2-TZVPP) and applied Whitesides (W) and concentration correction(cc).**

|         | B3LYP<br>+D3BJ/<br>def2-SVP<br>-W | M06/<br>def2-SVP<br>-W | M06/<br>def2-TZVP<br>-W | M06/<br>def2-TZVP<br>-W-cc | <b>M06/<br/>def2-TZVP<br/>/SMD<br/>-W-cc</b> | DLPNO-<br>CCSD(T)/<br>def2-TZVPP<br>-W-cc |
|---------|-----------------------------------|------------------------|-------------------------|----------------------------|----------------------------------------------|-------------------------------------------|
| INT-0   | 0                                 | 0                      | 0                       | 0                          | <b>0</b>                                     | 0                                         |
| INT-1   | -11                               | 19                     | 20                      | 16                         | <b>32(27)</b>                                | 25                                        |
| TS-1    | 88                                | 135                    | 141                     | 137                        | <b>152(140)</b>                              | 149                                       |
| INT-2   | 15                                | 24                     | 17                      | 13                         | <b>12(8)</b>                                 | 11                                        |
| TS-2A   | 188                               | 208                    | 205                     | 201                        | <b>203(197)</b>                              | 163                                       |
| INT-3B  | 72                                | 97                     | 108                     | 104                        | <b>120(105)</b>                              | 80                                        |
| INT-3A  | 97                                | 135                    | 131                     | 127                        | <b>129(125)</b>                              | 76                                        |
| TS-2B   | 243                               | 289                    | 306                     | 302                        | <b>292(304)</b>                              | 292                                       |
| INT-4A  | 166                               | 186                    | 206                     | 202                        | <b>161(155)</b>                              | 161                                       |
| INT-4B  | 33                                | 82                     | 102                     | 98                         | <b>111(112)</b>                              | 40                                        |
| TS-3A   | 180                               | 222                    | 243                     | 239                        | <b>250(255)</b>                              | 177                                       |
| INT-5A  | 113                               | 154                    | 171                     | 167                        | <b>174(168)</b>                              | 129                                       |
| INT-6A  | -221                              | -172                   | -129                    | -133                       | <b>-75</b>                                   | -218                                      |
| INT-6C  | 273                               | 328                    | 364                     | 361                        | <b>390</b>                                   | 299                                       |
| TS-4A   | -149                              | -108                   | -56                     | -60                        | <b>-3</b>                                    | -139                                      |
| TS-4C   | 187                               | 335                    | 376                     | 372                        | <b>403</b>                                   | 309                                       |
| INT-7A  | -220                              | -179                   | -135                    | -139                       | <b>-85</b>                                   | -218                                      |
| INT-7C  | 94                                | 145                    | 189                     | 185                        | <b>213</b>                                   | 123                                       |
| TS-5A   | -91                               | -67                    | -38                     | -42                        | <b>2</b>                                     | -79                                       |
| TS-5C   | 177                               | 214                    | 251                     | 247                        | <b>264</b>                                   | 213                                       |
| INT-8   | -66                               | -52                    | -13                     | -17                        | <b>-1</b>                                    | -43                                       |
| TS-6A   | 19                                | 31                     | 66                      | 62                         | <b>77</b>                                    | 42                                        |
| INT-9C  | -20                               | 8                      | 55                      | 51                         | <b>78</b>                                    | 36                                        |
| INT-9A  | -66                               | -76                    | -38                     | -42                        | <b>-32</b>                                   | -49                                       |
| TS-6C   | -14                               | 28                     | 67                      | 63                         | <b>95</b>                                    | 40                                        |
| INT-10A | -37                               | -33                    | 13                      | 9                          | <b>32</b>                                    | 0                                         |
| INT-10C | -58                               | -54                    | -34                     | -38                        | <b>-33</b>                                   | -44                                       |
| INT-10D | -15                               | 28                     | 65                      | 61                         | <b>92</b>                                    | 41                                        |
| TS-7A   | 37                                | 49                     | 109                     | 105                        | <b>130</b>                                   | 95                                        |
| TS-7C   | 164                               | 157                    | 195                     | 191                        | <b>196</b>                                   | 181                                       |
| TS-7D   | 152                               | 204                    | 249                     | 245                        | <b>236</b>                                   | 258                                       |
| FP      | -87                               | -105                   | -85                     | -89                        | <b>-87</b>                                   | -83                                       |

Furthermore, it needs to be ensured that the single-point energy calculations are trustable, therefore the key steps of LLHT and OA/MI (from INT-1 to INT-4B/INT-5A) structures were also geometry optimized with M06/def2-TZVP/SMD level. Thus, the difference between the single-point energy and optimized energy (values are shown in brackets of Table S8 at M06/def2-TZVP/SMD level) is reasonably small (<10 kJ/mol), which support the usage of the single point energy results.

## XV. The bonding system of Rh-L during the reaction path

The proposed mechanism pathway (Figure 1 black line) intermediate and transition state structures of the Rh transition metal bonding system was evaluated with Rh-L bond distances (Table S11), NPA (Natural Population Analysis) charges (Table S12), MBO (Mayor Bond Order) for Rh-L bond order (Table S13) and QTAIM (Quantum Theory of Atoms in Molecule) for the Rh-L bond critical points (CP(3,-1)) and the values (a.u.) of electron density ( $\rho$ ) distribution (Table S14).

The Rh catalyst coordinates to N-(2-methylthio)phenyl)benzamides as the first step (INT-1) of the reaction path, where the Rh ion forms bond with S of 2-(methylthio)aniline, while keeping bond with one of the O of PivOH. During the protonation of amide group (TS-1) the Rh-O(PivOH) bond breaks and Rh form a bond with the N of amide group (INT-2). This can be followed up by the decreasing bond order (Table S13) and electron density distribution (Table S14) of Rh-O(PivOH) bond and the opposite of Rh-N(2met) bond. The oxidative addition TS-2A and INT-3A steps, the Rh-S bond distance increase and parallel to that the bond order and electron density distribution decrease, while the formation of Rh-C5(Ph) bond formation occurs. The migratory insertion TS-3A and INT-5A steps, the Rh-S(2met) bond breaks, while the Rh-C5(Ph) stays a stable bond. Furthermore, first the Rh forms bonds each of the C6/C7 of maleimide, but as one of the C7 gets protonated during the migratory insertion (TS-3A) the bond breaks between Rh-C7. Interestingly the Rh-COD bonds (C1, C2, C3, C4) also weakens during the migratory insertion steps, which is a proof that the COD and second maleimide ligand substitution is possible. The bonding of second maleimide C8/C9 atoms to Rh is quite similar as the first maleimide C6/C7 atoms bonded to Rh before the migratory insertion. During the C-C bond formation the bonding of C8 breaks with Rh and forms a C-C bond with C5(Ph) and parallel to this the Rh-C5(Ph) bond also breaks (TS-4A). During the ligand-ligand hydrogen transfer the first maleimide C7 bond breaks with Rh and dissociates from the complex, while the COD re-coordinates to complex (INT-8). The C-N bond formation step between the second maleimide and amide group (TS-6) showed the N amide group bond breaking with Rh and formation of Rh-O when PivOH re-coordinates (INT-10A). The last transition state step (TS-7A) as maleimide gets protonated by the PivOH, the bonds between Rh-S(2met) and Rh-C9(maleimide) weakens greatly, thus getting ready for the dissociation of Rh catalyst and final product formation.

**1. Table S11: The bond distances around the Rh(I) ion for the proposed mechanism intermediate and transition states, computed at the M06/def2-TZVP level.**

|         | Rh-S<br>(2MA) | Rh-N<br>(2MA) | Rh-O<br>(PivOH) | Rh-C1<br>(COD) | Rh-C2<br>(COD) | Rh-C3<br>(COD) | Rh-C4<br>(COD) | Rh-C5<br>(Ph) | Rh-C6<br>(Mal) | Rh-C7<br>(Mal) | Rh-C8<br>(Mal) | Rh-C9<br>(Mal) |
|---------|---------------|---------------|-----------------|----------------|----------------|----------------|----------------|---------------|----------------|----------------|----------------|----------------|
| INT-1   | 2.40          | 3.65          | 2.08            | 2.15           | 2.15           | 2.15           | 2.14           | -             | -              | -              | -              | -              |
| TS-1    | 2.28          | 2.17          | 2.13            | 2.16           | 2.20           | -              | -              | -             | -              | -              | -              | -              |
| INT-2   | 2.37          | 2.13          | -               | 2.22           | 2.18           | 2.16           | 2.14           | -             | -              | -              | -              | -              |
| TS-2A   | 2.41          | 2.20          | -               | 2.16           | 2.18           | 2.19           | 2.17           | 2.16          | -              | -              | -              | -              |
| INT-3A  | 2.42          | 2.15          | -               | 2.16           | 2.40           | 2.43           | 2.02           | 2.02          | -              | -              | -              | -              |
| INT-4A  | -             | 2.12          | -               | -              | 2.62           | 2.63           | 2.01           | 2.01          | 2.39           | 2.34           | -              | -              |
| TS-3A   | -             | 2.20          | -               | 2.24           | 2.56           | 2.54           | 2.02           | 2.02          | 2.24           | 2.26           | -              | -              |
| INT-5A  | -             | 2.05          | -               | 2.33           | 2.53           | 2.48           | 2.01           | 2.03          | -              | 2.09           | -              | -              |
| INT-6A  | 2.50          | 2.03          | -               | -              | -              | -              | -              | 2.03          | -              | 2.13           | 2.32           | 2.33           |
| TS-4A   | 2.36          | 2.03          | -               | -              | -              | -              | -              | 2.14          | -              | 2.25           | -              | 2.13           |
| INT-7A  | 2.29          | 2.01          | -               | -              | -              | -              | -              | 2.41          | -              | 2.32           | -              | 2.09           |
| TS-5A   | 2.43          | 2.03          | -               | -              | -              | -              | -              | -             | -              | -              | -              | 2.05           |
| INT-8   | 2.53          | 2.11          | -               | 2.20           | 2.21           | 2.26           | 2.27           | -             | -              | -              | -              | 2.19           |
| TS-6A   | 2.62          | 2.28          | -               | 2.11           | 2.12           | 2.19           | 2.22           | -             | -              | -              | -              | 2.24           |
| INT-9A  | 2.39          | -             | -               | 2.16           | 2.16           | 2.21           | 2.23           | -             | -              | -              | -              | 2.13           |
| INT-10A | -             | -             | 2.20            | 2.12           | 2.13           | 2.19           | 2.20           | -             | -              | -              | -              | 2.16           |
| TS-7A   | -             | -             | 2.11            | 2.12           | 2.13           | 2.14           | 2.16           | -             | -              | -              | -              | 2.60           |

**2. Table S12: The NPA charges of Rh(I) and connecting ligands for the proposed mechanism intermediate and transition states, computed at the M06/def2-TZVP level.**

|         | Rh   | S<br>(2MA) | N<br>(2MA) | O<br>(PivOH) | C1<br>(COD) | C2<br>(COD) | C3<br>(COD) | C4<br>(COD) | C5<br>(Ph) | C6<br>(Mal) | C7<br>(Mal) | C8<br>(Mal) | C9<br>(Mal) |
|---------|------|------------|------------|--------------|-------------|-------------|-------------|-------------|------------|-------------|-------------|-------------|-------------|
| INT-1   | 0.35 | 0.39       | -0.65      | -0.72        | -0.19       | -0.19       | -0.22       | -0.19       | -          | -           | -           | -           | -           |
| TS-1    | 0.26 | 0.48       | -0.73      | -0.66        | -0.19       | -0.22       | -0.16       | -0.20       | -          | -           | -           | -           | -           |
| INT-2   | 0.28 | 0.42       | -0.66      | -            | -0.21       | -0.17       | -0.20       | -0.20       | -          | -           | -           | -           | -           |
| TS-2A   | 0.32 | 0.49       | -0.70      | -            | -0.17       | -0.16       | -0.28       | -0.20       | -0.12      | -           | -           | -           | -           |
| INT-3A  | 0.27 | 0.47       | -0.68      | -            | -0.18       | -0.18       | -0.20       | -0.18       | 0.03       | -           | -           | -           | -           |
| INT-4A  | 0.47 | 0.21       | -0.59      | -            | -0.40       | -0.16       | -0.18       | -0.19       | 0.06       | -0.32       | -0.31       | -           | -           |
| TS-3A   | 0.33 | 0.20       | -0.66      | -            | -0.14       | -0.19       | -0.18       | -0.19       | 0.07       | -0.25       | -0.34       | -           | -           |
| INT-5A  | 0.50 | 0.22       | -0.55      | -            | -0.23       | -0.16       | -0.17       | -0.21       | 0.05       | -0.51       | -0.36       | -           | -           |
| INT-6A  | 0.53 | 0.35       | -0.54      | -            | -           | -           | -           | -           | 0.03       | -           | -0.35       | -0.32       | -0.25       |
| TS-4A   | 0.53 | 0.48       | -0.52      | -            | -           | -           | -           | -           | -0.02      | -           | -0.41       | -           | -0.42       |
| INT-7A  | 0.57 | 0.58       | -0.52      | -            | -           | -           | -           | -           | -0.04      | -           | -0.46       | -           | -0.42       |
| TS-5A   | 0.10 | 0.37       | -0.60      | -            | -           | -           | -           | -           | -          | -           | -           | -           | -0.35       |
| INT-8   | 0.44 | 0.37       | -0.60      | -            | -0.20       | -0.21       | -0.17       | -0.17       | -          | -           | -           | -           | -0.37       |
| TS-6A   | 0.38 | 0.30       | -0.57      | -            | -0.18       | -0.19       | -0.25       | -0.19       | -          | -           | -           | -           | -0.52       |
| INT-9A  | 0.18 | 0.42       | -          | -            | -0.21       | -0.21       | -0.20       | -0.18       | -          | -           | -           | -           | -0.53       |
| INT-10A | 0.33 | -          | -          | -0.61        | -0.19       | -0.20       | -0.22       | -0.21       | -          | -0.61       | -           | -           | -0.55       |
| TS-7A   | 0.46 | -          | -          | -0.68        | -0.20       | -0.20       | -0.19       | -0.16       | -          | -           | -           | -           | -0.68       |

**3. Table S13: The bond orders (MBO) around Rh(I) ion for the proposed mechanism intermediate and transition states, computed at the M06/def2-TZVP level.**

|         | Rh-S<br>(2MA) | Rh-N<br>(2MA) | Rh-O<br>(PivOH) | Rh-C1<br>(COD) | Rh-C2<br>(COD) | Rh-C3<br>(COD) | Rh-C4<br>(COD) | Rh-C5<br>(Ph) | Rh-C6<br>(Mal) | Rh-C7<br>(Mal) | Rh-C8<br>(Mal) | Rh-C9<br>(Mal) |
|---------|---------------|---------------|-----------------|----------------|----------------|----------------|----------------|---------------|----------------|----------------|----------------|----------------|
| INT-1   | 0.60          | -             | 0.41            | 0.55           | 0.52           | 0.56           | 0.57           | -             | -              | -              | -              | -              |
| TS-1    | 0.75          | 0.42          | 0.31            | 0.52           | 0.48           | -              | -              | -             | -              | -              | -              | -              |
| INT-2   | 0.66          | 0.48          | -               | 0.44           | 0.52           | 0.55           | 0.55           | -             | -              | -              | -              | -              |
| TS-2A   | 0.69          | 0.48          | -               | 0.55           | 0.53           | 0.52           | 0.54           | 0.51          | -              | -              | -              | -              |
| INT-3A  | 0.68          | 0.53          | -               | 0.50           | 0.56           | 0.30           | 0.32           | 0.67          | -              | -              | -              | -              |
| INT-4A  | -             | 0.70          | -               | 0.26           | 0.77           | 0.22           | 0.23           | 0.67          | 0.46           | 0.43           | -              | -              |
| TS-3A   | -             | 0.60          | -               | 0.42           | 0.50           | 0.24           | 0.24           | 0.64          | 0.44           | 0.52           | -              | -              |
| INT-5A  | -             | 0.69          | -               | 0.42           | 0.40           | 0.23           | 0.29           | 0.64          | -              | 0.69           | -              | -              |
| INT-6A  | 0.57          | 0.67          | -               | -              | -              | -              | -              | 0.69          | -              | 0.63           | 0.38           | 0.38           |
| TS-4A   | 0.68          | 0.63          | -               | -              | -              | -              | -              | 0.38          | -              | 0.46           | -              | 0.57           |
| INT-7A  | 0.80          | 0.58          | -               | -              | -              | -              | -              | 0.26          | -              | 0.36           | -              | 0.63           |
| TS-5A   | 0.63          | 0.64          | -               | -              | -              | -              | -              | -             | -              | -              | -              | 0.74           |
| INT-8   | 0.57          | 0.50          | -               | 0.51           | 0.50           | 0.45           | 0.41           | -             | -              | -              | -              | 0.57           |
| TS-6A   | 0.43          | 0.33          | -               | 0.54           | 0.47           | 0.61           | 0.58           | -             | -              | -              | -              | 0.35           |
| INT-9A  | 0.58          | -             | -               | 0.50           | 0.47           | 0.53           | 0.46           | -             | -              | -              | -              | 0.57           |
| INT-10A | -             | -             | 0.29            | 0.59           | 0.55           | 0.49           | 0.47           | -             | -              | -              | -              | 0.54           |
| TS-7A   | -             | -             | 0.39            | 0.56           | 0.53           | 0.58           | 0.60           | -             | -              | -              | -              | -              |

**4. Table S14: The critical points (3, -1) and the values (a.u.) of electron density ( $\rho$ ) distribution around the Rh(I) ion for the proposed mechanism intermediate and transition states, computed at the M06/def2-TZVP level.**

|         | Rh-S<br>(2MA) | Rh-N<br>(2MA) | Rh-O<br>(PivOH) | Rh-C1<br>(COD) | Rh-C2<br>(COD) | Rh-C3<br>(COD) | Rh-C4<br>(COD) | Rh-C5<br>(Ph) | Rh-C6<br>(Mal) | Rh-C7<br>(Mal) | Rh-C8<br>(Mal) | Rh-C9<br>(Mal) |
|---------|---------------|---------------|-----------------|----------------|----------------|----------------|----------------|---------------|----------------|----------------|----------------|----------------|
| INT-1   | 0.075         | -             | 0.088           | 0.095          | 0.096          | 0.097          | 0.099          | -             | -              | -              | -              | -              |
| TS-1    | 0.097         | 0.081         | 0.073           | 0.092          | 0.086          | -              | -              | -             | -              | -              | -              | -              |
| INT-2   | 0.082         | 0.090         | -               | 0.089          | -              | 0.095          | 0.098          | -             | -              | -              | -              | -              |
| TS-2A   | 0.077         | 0.081         | -               | 0.086          | 0.094          | 0.092          | 0.090          | 0.096         | -              | -              | -              | -              |
| INT-3A  | 0.075         | 0.089         | -               | 0.090          | 0.095          | -              | 0.056          | 0.134         | -              | -              | -              | -              |
| INT-4A  | -             | 0.096         | -               | 0.119          | 0.038          | -              | -              | 0.119         | 0.070          | 0.064          | -              | -              |
| TS-3A   | -             | 0.079         | -               | 0.079          | 0.044          | -              | -              | 0.135         | 0.080          | 0.083          | -              | -              |
| INT-5A  | -             | 0.099         | -               | 0.069          | 0.049          | -              | -              | 0.139         | -              | 0.114          | -              | -              |
| INT-6A  | 0.064         | 0.117         | -               | -              | -              | -              | -              | 0.133         | -              | 0.102          | 0.064          | 0.065          |
| TS-4A   | 0.083         | 0.117         | -               | -              | -              | -              | -              | 0.095         | -              | 0.078          | 0.095          | 0.068          |
| INT-7A  | 0.099         | 0.120         | -               | -              | -              | -              | -              | 0.050         | -              | 0.068          | -              | 0.111          |
| TS-5A   | 0.074         | 0.115         | -               | -              | -              | -              | -              | -             | -              | -              | -              | 0.117          |
| INT-8   | 0.063         | 0.096         | -               | 0.085          | 0.087          | 0.076          | 0.074          | -             | -              | -              | -              | 0.103          |
| TS-6A   | 0.048         | 0.062         | -               | 0.084          | 0.087          | 0.105          | 0.105          | -             | -              | -              | -              | 0.074          |
| INT-9A  | 0.075         | -             | -               | 0.081          | 0.084          | 0.094          | 0.094          | -             | -              | -              | -              | 0.103          |
| INT-10A | -             | -             | 0.062           | 0.100          | 0.104          | 0.085          | 0.087          | -             | -              | -              | -              | 0.097          |
| TS-7A   | -             | -             | 0.082           | 0.095          | 0.098          | 0.102          | 0.103          | -             | -              | -              | -              | 0.042          |

## XVI. Cartesian coordinates, absolute energies, and imaginary frequency of transition states

All cartesian coordinates are given here in angstrom, and energies are the total energies in Hartree (a.u.) as reported by the Gaussian 16 on the M06/def2-TZVP/SMD level of theory.

### RhCODPivO

E(RM06) = -768.905626074

|    |              |              |              |
|----|--------------|--------------|--------------|
| Rh | 0.436951000  | 0.018270000  | 0.013771000  |
| C  | 1.789132000  | -1.480277000 | 0.609063000  |
| C  | 1.948789000  | -0.376049000 | 1.450679000  |
| C  | 3.103668000  | 0.594936000  | 1.376023000  |
| C  | 2.762247000  | 1.808225000  | 0.509383000  |
| C  | 1.822842000  | 1.472149000  | -0.614564000 |
| C  | 1.925985000  | 0.363607000  | -1.459247000 |
| C  | 3.050327000  | -0.644447000 | -1.411459000 |
| C  | 2.689681000  | -1.846556000 | -0.537164000 |
| H  | 1.160415000  | -2.291000000 | 0.975513000  |
| H  | 1.416882000  | -0.405259000 | 2.399658000  |
| H  | 1.212292000  | 2.303172000  | -0.965874000 |
| H  | 1.373248000  | 0.410627000  | -2.395542000 |
| H  | 3.273443000  | -0.986346000 | -2.424409000 |
| H  | 3.964507000  | -0.164159000 | -1.053046000 |
| H  | 2.158787000  | -2.583111000 | -1.146606000 |
| H  | 3.595986000  | -2.350149000 | -0.175221000 |
| H  | 3.993343000  | 0.085050000  | 0.997472000  |
| H  | 3.675913000  | 2.281204000  | 0.125347000  |
| H  | 3.360934000  | 0.929522000  | 2.383302000  |
| H  | 2.271043000  | 2.562155000  | 1.130716000  |
| C  | -2.027225000 | 0.050516000  | 0.038206000  |
| O  | -1.388594000 | -0.661185000 | 0.868459000  |
| O  | -1.387666000 | 0.755088000  | -0.796816000 |
| C  | -3.538875000 | 0.005640000  | 0.002805000  |
| C  | -4.093801000 | -0.243625000 | 1.396877000  |
| H  | -3.708042000 | -1.172690000 | 1.817436000  |
| H  | -3.832234000 | 0.569216000  | 2.078650000  |
| H  | -5.184223000 | -0.308755000 | 1.349747000  |
| C  | -3.905638000 | -1.163661000 | -0.913412000 |
| H  | -3.510733000 | -1.010371000 | -1.920630000 |
| H  | -3.511018000 | -2.104833000 | -0.523730000 |
| H  | -4.993605000 | -1.248847000 | -0.981162000 |
| C  | -4.098381000 | 1.298571000  | -0.568983000 |
| H  | -3.831926000 | 2.155781000  | 0.053794000  |
| H  | -3.721093000 | 1.484779000  | -1.574939000 |
| H  | -5.189136000 | 1.236474000  | -0.612553000 |

### Mal

E(RM06) = -398.666378615

|   |              |              |              |
|---|--------------|--------------|--------------|
| N | -0.010856000 | 0.588248000  | 0.000028000  |
| C | 1.148735000  | -0.177879000 | 0.000086000  |
| C | -0.629292000 | -1.628674000 | -0.000050000 |
| C | 0.694836000  | -1.602025000 | -0.000075000 |
| C | -1.136850000 | -0.223049000 | 0.000125000  |
| O | 2.270899000  | 0.242383000  | -0.000047000 |
| O | -2.272452000 | 0.160649000  | 0.000037000  |
| C | -0.051657000 | 2.026699000  | -0.000028000 |
| H | -1.298856000 | -2.476155000 | -0.000140000 |
| H | 0.974963000  | 2.389541000  | -0.000145000 |
| H | -0.570509000 | 2.397771000  | -0.885011000 |
| H | -0.570328000 | 2.397845000  | 0.885031000  |
| H | 1.398518000  | -2.421433000 | -0.000190000 |

### Mal

E(RM06) = -399.904066920

|   |              |              |              |
|---|--------------|--------------|--------------|
| H | 1.137510000  | -2.108588000 | 0.874276000  |
| N | 0.016814000  | 0.620438000  | -0.000039000 |
| C | -1.168197000 | -0.102254000 | -0.000116000 |
| C | 0.710959000  | -1.614859000 | 0.000031000  |
| C | -0.807418000 | -1.568810000 | 0.000017000  |
| C | 1.154161000  | -0.171453000 | -0.000046000 |
| O | -2.266011000 | 0.378140000  | 0.000041000  |
| O | 2.274865000  | 0.253971000  | 0.000008000  |
| C | 0.076259000  | 2.060024000  | 0.000032000  |
| H | 1.137537000  | -2.108702000 | -0.874134000 |
| H | -0.944358000 | 2.438045000  | 0.000154000  |
| H | 0.606423000  | 2.417750000  | 0.883346000  |
| H | 0.606235000  | 2.417851000  | -0.883355000 |
| H | -1.263225000 | -2.036155000 | -0.874014000 |
| H | -1.263239000 | -2.036042000 | 0.874102000  |

### PivOH

E(RM06) = -346.951160434

|   |              |              |              |
|---|--------------|--------------|--------------|
| H | 2.545366000  | -0.762733000 | 0.000041000  |
| C | 0.938926000  | 0.186834000  | -0.000027000 |
| O | 1.510610000  | 1.239943000  | -0.000155000 |
| O | 1.603816000  | -0.983917000 | 0.000076000  |
| C | -0.563931000 | -0.011968000 | 0.000008000  |
| C | -1.244320000 | 1.345373000  | -0.000176000 |
| H | -0.968294000 | 1.927624000  | 0.880605000  |
| H | -0.968307000 | 1.927378000  | -0.881124000 |
| H | -2.328703000 | 1.210120000  | -0.000149000 |
| C | -0.961616000 | -0.794778000 | 1.249064000  |
| H | -0.507643000 | -1.786464000 | 1.263098000  |
| H | -0.664269000 | -0.265646000 | 2.158136000  |
| H | -2.048004000 | -0.913498000 | 1.270454000  |
| C | -0.961646000 | -0.795134000 | -1.248813000 |
| H | -2.048034000 | -0.913866000 | -1.270139000 |
| H | -0.664328000 | -0.266260000 | -2.158044000 |
| H | -0.507668000 | -1.786822000 | -1.262580000 |

### RhPivO

E(RM06) = -456.882764239

|    |              |              |              |
|----|--------------|--------------|--------------|
| Rh | 1.846138000  | 0.000000000  | 0.002588000  |
| C  | -0.541794000 | 0.000001000  | -0.059667000 |
| O  | 0.127783000  | -1.075816000 | -0.051506000 |
| O  | 0.127784000  | 1.075818000  | -0.051507000 |
| C  | -2.044700000 | 0.000000000  | -0.009105000 |
| C  | -2.590075000 | -1.251527000 | -0.679904000 |
| H  | -2.320194000 | -1.285030000 | -1.737795000 |
| H  | -2.209372000 | -2.156593000 | -0.205119000 |
| H  | -3.680532000 | -1.255216000 | -0.606551000 |
| C  | -2.590076000 | 1.251554000  | -0.679852000 |
| H  | -2.209375000 | 2.156602000  | -0.205030000 |
| H  | -2.320195000 | 1.285103000  | -1.737741000 |
| H  | -3.680534000 | 1.255239000  | -0.606499000 |
| C  | -2.421475000 | -0.000031000 | 1.474661000  |

|   |              |              |             |
|---|--------------|--------------|-------------|
| H | -2.030845000 | -0.887010000 | 1.978400000 |
| H | -2.030844000 | 0.886928000  | 1.978437000 |
| H | -3.510154000 | -0.000032000 | 1.572736000 |

INT-0

E(RM06) = -1069.27126107

|   |              |              |              |
|---|--------------|--------------|--------------|
| C | -2.292479000 | -0.452475000 | -0.039235000 |
| C | -2.495308000 | 0.791496000  | -0.629173000 |
| C | -3.765255000 | 1.336458000  | -0.694924000 |
| C | -4.844853000 | 0.647573000  | -0.169415000 |
| C | -4.652437000 | -0.594252000 | 0.413935000  |
| C | -3.385816000 | -1.142114000 | 0.472267000  |
| C | -0.959858000 | -1.125906000 | 0.065674000  |
| O | -0.866941000 | -2.310072000 | 0.300487000  |
| N | 0.114495000  | -0.293334000 | -0.104823000 |
| C | 1.473125000  | -0.592216000 | -0.120153000 |
| C | 1.970974000  | -1.891224000 | -0.050245000 |
| C | 3.334912000  | -2.112196000 | -0.092261000 |
| C | 4.228657000  | -1.061553000 | -0.204283000 |
| C | 3.741127000  | 0.230566000  | -0.269998000 |
| C | 2.378164000  | 0.479599000  | -0.223760000 |
| S | 1.801507000  | 2.161205000  | -0.315230000 |
| C | 1.617220000  | 2.497657000  | 1.458586000  |
| H | -1.672922000 | 1.343822000  | -1.073413000 |
| H | -5.838599000 | 1.077055000  | -0.220285000 |
| H | -5.495485000 | -1.138834000 | 0.822585000  |
| H | -3.214101000 | -2.116544000 | 0.913339000  |
| H | -3.912024000 | 2.301552000  | -1.165125000 |
| H | -0.070050000 | 0.692832000  | -0.237866000 |
| H | 1.275650000  | -2.712162000 | 0.039068000  |
| H | 3.701390000  | -3.130897000 | -0.038328000 |
| H | 5.295579000  | -1.244339000 | -0.239872000 |
| H | 4.417193000  | 1.073621000  | -0.358532000 |
| H | 0.903241000  | 1.811469000  | 1.915162000  |
| H | 2.582134000  | 2.410221000  | 1.957224000  |
| H | 1.248904000  | 3.518349000  | 1.557485000  |

INT-1

E(RM06) = -1838.20300249

|   |              |              |              |
|---|--------------|--------------|--------------|
| C | 1.792506000  | 2.499644000  | -1.138468000 |
| C | 1.802690000  | 1.232528000  | -1.705410000 |
| C | 2.952901000  | 0.737765000  | -2.290289000 |
| C | 4.109374000  | 1.500191000  | -2.296633000 |
| C | 4.106335000  | 2.765426000  | -1.730849000 |
| C | 2.948595000  | 3.268267000  | -1.167013000 |
| C | 0.559830000  | 3.103983000  | -0.559800000 |
| O | 0.364985000  | 4.297613000  | -0.608104000 |
| N | -0.322219000 | 2.197593000  | 0.002251000  |
| C | -1.645851000 | 2.434646000  | 0.344668000  |
| C | -2.329025000 | 3.572100000  | -0.098670000 |
| C | -3.668404000 | 3.753803000  | 0.176955000  |
| C | -4.384623000 | 2.820227000  | 0.906156000  |
| C | -3.725908000 | 1.699054000  | 1.365541000  |
| C | -2.374794000 | 1.498069000  | 1.103188000  |
| S | -1.694063000 | -0.008016000 | 1.756563000  |
| C | -0.579594000 | 0.598007000  | 3.044943000  |
| H | 0.901036000  | 0.629154000  | -1.690243000 |
| H | 5.014777000  | 1.108783000  | -2.746159000 |
| H | 5.009459000  | 3.364319000  | -1.736294000 |
| H | 2.920580000  | 4.263989000  | -0.740394000 |
| H | 2.949543000  | -0.250639000 | -2.738130000 |
| H | 0.094433000  | 1.299757000  | 0.266054000  |

|    |              |              |              |
|----|--------------|--------------|--------------|
| H  | -1.784091000 | 4.314312000  | -0.661100000 |
| H  | -4.159406000 | 4.647214000  | -0.191503000 |
| H  | -5.435931000 | 2.965027000  | 1.120688000  |
| H  | -4.251492000 | 0.951451000  | 1.949322000  |
| H  | 0.205820000  | 1.228479000  | 2.635539000  |
| H  | -1.182667000 | 1.127202000  | 3.781575000  |
| H  | -0.130089000 | -0.285953000 | 3.497909000  |
| Rh | -0.750500000 | -1.427059000 | 0.066720000  |
| C  | -0.446851000 | -3.319473000 | -0.910723000 |
| C  | 0.280417000  | -2.342510000 | -1.581184000 |
| C  | -0.132617000 | -1.720064000 | -2.884236000 |
| C  | -1.580065000 | -1.219893000 | -2.883585000 |
| C  | -2.088526000 | -0.841738000 | -1.508575000 |
| C  | -2.743234000 | -1.721977000 | -0.646334000 |
| C  | -2.957368000 | -3.193181000 | -0.865865000 |
| C  | -1.732619000 | -3.908380000 | -1.434028000 |
| H  | 0.075335000  | -3.885726000 | -0.142987000 |
| H  | 1.330970000  | -2.230191000 | -1.315057000 |
| H  | -2.299731000 | 0.217273000  | -1.368744000 |
| H  | -3.432744000 | -1.281435000 | 0.073137000  |
| H  | -3.205986000 | -3.632417000 | 0.104662000  |
| H  | -3.834142000 | -3.361476000 | -1.505989000 |
| H  | -1.779236000 | -4.967623000 | -1.172050000 |
| H  | -1.737654000 | -3.870788000 | -2.526625000 |
| H  | 0.023625000  | -2.430943000 | -3.706433000 |
| H  | -2.244974000 | -1.973691000 | -3.315615000 |
| H  | 0.538725000  | -0.883416000 | -3.090860000 |
| H  | -1.657697000 | -0.349758000 | -3.538798000 |
| C  | 1.794832000  | -0.865257000 | 1.342474000  |
| O  | 0.965165000  | -1.822178000 | 1.174503000  |
| O  | 1.591286000  | 0.305740000  | 1.020866000  |
| C  | 3.147344000  | -1.233686000 | 1.958037000  |
| C  | 3.190560000  | -2.671109000 | 2.444783000  |
| H  | 2.437306000  | -2.854570000 | 3.214380000  |
| H  | 3.008706000  | -3.374137000 | 1.629845000  |
| H  | 4.174588000  | -2.886726000 | 2.871900000  |
| C  | 3.433244000  | -0.284873000 | 3.114765000  |
| H  | 3.403075000  | 0.754060000  | 2.783853000  |
| H  | 2.701336000  | -0.411266000 | 3.918746000  |
| H  | 4.423255000  | -0.490842000 | 3.531807000  |
| C  | 4.186420000  | -1.027829000 | 0.858792000  |
| H  | 5.186020000  | -1.260372000 | 1.237625000  |
| H  | 3.988198000  | -1.686826000 | 0.006410000  |
| H  | 4.175846000  | 0.004435000  | 0.500621000  |

TS-1

E(RM06) = -1838.15570781

|   |              |              |              |
|---|--------------|--------------|--------------|
| C | 1.697977000  | 0.922512000  | 1.895734000  |
| C | 1.471779000  | -0.094635000 | 2.814675000  |
| C | 2.524003000  | -0.855274000 | 3.287299000  |
| C | 3.818663000  | -0.580779000 | 2.873122000  |
| C | 4.052653000  | 0.458224000  | 1.989133000  |
| C | 2.994776000  | 1.204905000  | 1.494635000  |
| C | 0.526976000  | 1.723618000  | 1.420207000  |
| O | -0.144309000 | 2.346008000  | 2.217373000  |
| N | 0.266590000  | 1.680148000  | 0.051072000  |
| C | -0.738385000 | 2.601610000  | -0.354239000 |
| C | -0.413402000 | 3.903361000  | -0.700738000 |
| C | -1.402967000 | 4.791557000  | -1.083579000 |
| C | -2.729762000 | 4.393697000  | -1.115760000 |
| C | -3.063710000 | 3.096347000  | -0.768799000 |
| C | -2.068529000 | 2.211512000  | -0.391756000 |



|    |              |              |              |
|----|--------------|--------------|--------------|
| S  | -2.467122000 | 0.516931000  | 0.020347000  |
| C  | -2.934734000 | 0.755150000  | 1.760580000  |
| H  | 0.454465000  | -0.290315000 | 3.139845000  |
| H  | 4.646430000  | -1.170419000 | 3.249736000  |
| H  | 5.066600000  | 0.691954000  | 1.683201000  |
| H  | 3.180953000  | 2.009483000  | 0.791612000  |
| H  | 2.337211000  | -1.660958000 | 3.987862000  |
| H  | 0.626471000  | 4.209705000  | -0.660939000 |
| H  | -1.135744000 | 5.804794000  | -1.359933000 |
| H  | -3.502103000 | 5.089103000  | -1.421321000 |
| H  | -4.095128000 | 2.760067000  | -0.799564000 |
| H  | -2.096446000 | 1.166539000  | 2.323803000  |
| H  | -3.784308000 | 1.438108000  | 1.793464000  |
| H  | -3.235733000 | -0.221498000 | 2.139583000  |
| Rh | -0.378896000 | -0.375371000 | -0.186584000 |
| C  | 2.395191000  | -0.191379000 | -1.263988000 |
| O  | 1.615687000  | -0.949215000 | -0.664823000 |
| O  | 2.176873000  | 1.053220000  | -1.458498000 |
| C  | 3.663529000  | -0.767743000 | -1.866506000 |
| C  | 4.783933000  | 0.261461000  | -1.859316000 |
| H  | 4.513622000  | 1.152043000  | -2.426987000 |
| H  | 5.028735000  | 0.570002000  | -0.839320000 |
| H  | 5.681882000  | -0.174415000 | -2.304955000 |
| C  | 3.310069000  | -1.136847000 | -3.308657000 |
| H  | 2.499695000  | -1.870387000 | -3.336863000 |
| H  | 3.002408000  | -0.256414000 | -3.877304000 |
| H  | 4.183603000  | -1.574724000 | -3.798809000 |
| C  | 4.089802000  | -2.014789000 | -1.107655000 |
| H  | 5.001069000  | -2.419617000 | -1.555597000 |
| H  | 4.292887000  | -1.787528000 | -0.057594000 |
| H  | 3.317355000  | -2.784346000 | -1.139680000 |
| H  | 1.304027000  | 1.398560000  | -0.824785000 |
| C  | -4.117767000 | -2.086735000 | -0.549797000 |
| C  | -3.965654000 | -2.668650000 | 0.633350000  |
| C  | -2.863779000 | -3.559073000 | 1.115497000  |
| C  | -1.594601000 | -2.825901000 | 1.545474000  |
| C  | -0.631490000 | -2.422649000 | 0.462059000  |
| C  | -0.785295000 | -2.411253000 | -0.922392000 |
| C  | -1.943560000 | -2.852166000 | -1.788546000 |
| C  | -3.277979000 | -2.125529000 | -1.778716000 |
| H  | -4.999990000 | -1.458863000 | -0.663695000 |
| H  | -4.734380000 | -2.454517000 | 1.373658000  |
| H  | 0.403541000  | -2.515397000 | 0.793924000  |
| H  | 0.155432000  | -2.527083000 | -1.458830000 |
| H  | -1.587557000 | -2.795307000 | -2.821233000 |
| H  | -2.111560000 | -3.921910000 | -1.612983000 |
| H  | -3.113275000 | -1.088928000 | -2.098097000 |
| H  | -3.889366000 | -2.561473000 | -2.579825000 |
| H  | -2.603773000 | -4.314816000 | 0.371035000  |
| H  | -1.033633000 | -3.488527000 | 2.214808000  |
| H  | -3.235063000 | -4.116169000 | 1.979663000  |
| H  | -1.852643000 | -1.960380000 | 2.169002000  |

INT-2

E(RM06) = -1491.22536898

|   |              |             |              |
|---|--------------|-------------|--------------|
| C | 1.270716000  | 2.335986000 | -0.020770000 |
| C | 1.713127000  | 1.750165000 | 1.159724000  |
| C | 3.033583000  | 1.876872000 | 1.556720000  |
| C | 3.929966000  | 2.582433000 | 0.770576000  |
| C | 3.491739000  | 3.189327000 | -0.396176000 |
| C | 2.165998000  | 3.082550000 | -0.776668000 |
| C | -0.150313000 | 2.246071000 | -0.497533000 |

|    |              |              |              |
|----|--------------|--------------|--------------|
| O  | -0.643950000 | 3.239090000  | -1.010766000 |
| N  | -0.773321000 | 1.056237000  | -0.265093000 |
| C  | -2.163041000 | 0.966359000  | -0.366685000 |
| C  | -2.983902000 | 1.741673000  | -1.193864000 |
| C  | -4.355916000 | 1.559794000  | -1.200114000 |
| C  | -4.971851000 | 0.618190000  | -0.393098000 |
| C  | -4.183881000 | -0.163219000 | 0.432904000  |
| C  | -2.812893000 | 0.011653000  | 0.436362000  |
| S  | -1.806331000 | -1.006306000 | 1.494446000  |
| C  | -1.564394000 | 0.125202000  | 2.893207000  |
| H  | 1.018622000  | 1.183969000  | 1.771953000  |
| H  | 4.966444000  | 2.672569000  | 1.074947000  |
| H  | 4.186347000  | 3.753549000  | -1.007830000 |
| H  | 1.800606000  | 3.569227000  | -1.673546000 |
| H  | 3.364759000  | 1.423904000  | 2.484676000  |
| H  | -2.527922000 | 2.487874000  | 2.855021000  |
| H  | -4.957422000 | 2.171702000  | -1.863439000 |
| H  | -6.046449000 | 0.485633000  | -0.412896000 |
| H  | -4.624161000 | -0.919675000 | 1.073872000  |
| H  | -1.234995000 | 1.096327000  | 2.526599000  |
| H  | -2.504887000 | 0.222753000  | 3.434690000  |
| H  | -0.804222000 | -0.310270000 | 3.542388000  |
| Rh | 0.099692000  | -0.848098000 | 0.097652000  |
| C  | 1.992173000  | -0.687165000 | -1.060167000 |
| C  | 0.944562000  | -1.011144000 | -1.902275000 |
| C  | 0.609116000  | -2.379515000 | -2.417961000 |
| C  | 0.751632000  | -3.473426000 | -1.361877000 |
| C  | 0.324247000  | -2.992172000 | 0.003876000  |
| C  | 1.171904000  | -2.471942000 | 0.979953000  |
| C  | 2.645264000  | -2.224589000 | 0.831128000  |
| C  | 3.030024000  | -1.643504000 | -0.529684000 |
| H  | 2.267533000  | 0.359990000  | -1.013618000 |
| H  | 0.483875000  | -0.188143000 | -2.445779000 |
| H  | -0.622978000 | -3.396702000 | -0.353922000 |
| H  | 0.832317000  | -2.545624000 | 2.013903000  |
| H  | 2.938054000  | -1.513013000 | 1.609905000  |
| H  | 3.214173000  | -3.142673000 | 1.031952000  |
| H  | 3.976655000  | -1.107128000 | -0.429868000 |
| H  | 3.213170000  | -2.440803000 | -1.254107000 |
| H  | 1.224022000  | -2.609710000 | -3.298631000 |
| H  | 1.777641000  | -3.846303000 | -1.323673000 |
| H  | -0.425484000 | -2.356263000 | -2.771232000 |
| H  | 0.137129000  | -4.329873000 | -1.648313000 |

TS-2A

E(RM06) = -1491.15155220

|   |              |              |              |
|---|--------------|--------------|--------------|
| C | 1.091891000  | 2.220914000  | -0.417934000 |
| C | 1.737844000  | 1.227259000  | 0.334088000  |
| C | 3.052636000  | 1.474365000  | 0.734050000  |
| C | 3.697796000  | 2.659539000  | 0.419376000  |
| C | 3.042644000  | 3.635785000  | -0.310068000 |
| C | 1.744103000  | 3.409304000  | -0.720527000 |
| C | -0.327874000 | 2.069844000  | -0.872259000 |
| O | -0.996344000 | 3.043221000  | -1.187696000 |
| N | -0.771802000 | 0.789038000  | -0.792927000 |
| C | -2.132797000 | 0.600982000  | -0.588029000 |
| C | -3.133802000 | 0.858253000  | -1.518200000 |
| C | -4.459464000 | 0.615052000  | -1.200026000 |
| C | -4.822907000 | 0.123117000  | 0.044284000  |
| C | -3.843829000 | -0.119042000 | 0.994505000  |
| C | -2.523055000 | 0.126575000  | 0.669879000  |
| S | -1.213759000 | -0.103088000 | 1.866967000  |

|    |              |              |              |
|----|--------------|--------------|--------------|
| C  | -1.036587000 | 1.599079000  | 2.452426000  |
| H  | 1.598454000  | -0.000174000 | 1.345529000  |
| H  | 4.715561000  | 2.818807000  | 0.758465000  |
| H  | 3.542186000  | 4.565246000  | -0.557086000 |
| H  | 1.188887000  | 4.146373000  | -1.291255000 |
| H  | 3.588762000  | 0.734169000  | 1.321330000  |
| H  | -2.852854000 | 1.256990000  | -2.485036000 |
| H  | -5.226595000 | 0.812698000  | -1.940363000 |
| H  | -5.863010000 | -0.071720000 | 0.274946000  |
| H  | -4.100582000 | -0.495579000 | 1.978851000  |
| H  | -0.915824000 | 2.280452000  | 1.611291000  |
| H  | -1.930193000 | 1.857210000  | 3.019454000  |
| H  | -0.156679000 | 1.635716000  | 3.093646000  |
| Rh | 0.549544000  | -0.587530000 | 0.298609000  |
| C  | 2.334315000  | -1.512032000 | -0.635866000 |
| C  | 1.448125000  | -1.061899000 | -1.611153000 |
| C  | 0.465608000  | -1.912198000 | -2.363592000 |
| C  | -0.245301000 | -2.950349000 | -1.496927000 |
| C  | -0.485375000 | -2.463080000 | -0.083084000 |
| C  | 0.404243000  | -2.657619000 | 0.989647000  |
| C  | 1.722372000  | -3.375365000 | 0.926077000  |
| C  | 2.548651000  | -2.963661000 | -0.280411000 |
| H  | 3.159768000  | -0.847560000 | -0.404766000 |
| H  | 1.660545000  | -0.097200000 | -2.066319000 |
| H  | -1.533818000 | -2.341094000 | 0.181144000  |
| H  | -0.039628000 | -2.650796000 | 1.982887000  |
| H  | 2.276137000  | -3.130876000 | 1.836639000  |
| H  | 1.566955000  | -4.463537000 | 0.947028000  |
| H  | 3.609736000  | -3.126006000 | -0.076929000 |
| H  | 2.314523000  | -3.587170000 | -1.146875000 |
| H  | 0.966442000  | -2.387774000 | -3.218352000 |
| H  | 0.309578000  | -3.893138000 | -1.476470000 |
| H  | -0.282376000 | -1.236049000 | -2.786753000 |
| H  | -1.207378000 | -3.188714000 | -1.955349000 |

INT-3B

E(RM06) = -1889.88840342

|   |              |              |              |
|---|--------------|--------------|--------------|
| C | 2.176663000  | 2.149525000  | -0.668477000 |
| C | 2.844535000  | 2.191793000  | 0.549607000  |
| C | 3.278380000  | 3.400316000  | 1.067209000  |
| C | 3.028456000  | 4.575730000  | 0.379243000  |
| C | 2.368089000  | 4.540093000  | -0.839820000 |
| C | 1.962931000  | 3.330682000  | -1.370334000 |
| C | 1.817301000  | 0.841496000  | -1.289579000 |
| O | 1.880241000  | 0.709128000  | -2.492300000 |
| N | 1.456067000  | -0.187937000 | -0.417037000 |
| C | 2.159481000  | -1.362814000 | -0.528751000 |
| C | 3.489365000  | -1.386640000 | -1.004030000 |
| C | 4.235845000  | -2.539488000 | -1.000866000 |
| C | 3.718053000  | -3.739173000 | -0.520340000 |
| C | 2.424974000  | -3.747587000 | -0.050237000 |
| C | 1.656357000  | -2.588248000 | -0.068324000 |
| S | -0.024980000 | -2.678406000 | 0.469308000  |
| C | -0.779912000 | -3.508905000 | -0.952317000 |
| H | 3.035512000  | 1.262914000  | 1.077182000  |
| H | 3.356889000  | 5.523760000  | 0.789432000  |
| H | 2.178938000  | 5.459495000  | -1.381240000 |
| H | 1.479569000  | 3.281754000  | -2.339975000 |
| H | 3.812937000  | 3.424774000  | 2.009646000  |
| H | 3.931051000  | -0.469782000 | -1.376337000 |
| H | 5.253670000  | -2.503338000 | -1.373190000 |
| H | 4.316274000  | -4.641170000 | -0.511658000 |

|    |              |              |              |
|----|--------------|--------------|--------------|
| H  | 1.982222000  | -4.660736000 | 0.335461000  |
| H  | -0.447813000 | -3.043106000 | -1.877940000 |
| H  | -0.489376000 | -4.559126000 | -0.932088000 |
| H  | -1.862591000 | -3.412414000 | -0.876247000 |
| Rh | -0.525754000 | -0.228727000 | 0.387071000  |
| C  | 0.015592000  | 1.144310000  | 2.088243000  |
| C  | 0.457897000  | -0.139687000 | 2.368490000  |
| C  | -0.206480000 | -1.074661000 | 3.338399000  |
| C  | -1.713371000 | -1.232706000 | 3.115597000  |
| C  | -2.188970000 | -0.941373000 | 1.709722000  |
| C  | -2.543898000 | 0.307816000  | 1.241985000  |
| C  | -2.453084000 | 1.609275000  | 1.980730000  |
| C  | -1.169792000 | 1.766986000  | 2.779756000  |
| H  | 0.716889000  | 1.830432000  | 1.627977000  |
| H  | 1.494626000  | -0.371451000 | 2.135868000  |
| H  | -2.622963000 | -1.782876000 | 1.174172000  |
| H  | -3.257825000 | 0.307867000  | 0.427836000  |
| H  | -2.521920000 | 2.412328000  | 1.242822000  |
| H  | -3.336505000 | 1.718270000  | 2.625137000  |
| H  | -0.973745000 | 2.829480000  | 2.937753000  |
| H  | -1.276170000 | 1.331814000  | 3.777929000  |
| H  | -0.012500000 | -0.747131000 | 4.367856000  |
| H  | -2.269806000 | -0.583571000 | 3.798785000  |
| H  | 0.271664000  | -2.052213000 | 3.245087000  |
| H  | -2.005095000 | -2.253413000 | 3.371580000  |
| N  | -3.304098000 | 0.532647000  | -1.848377000 |
| C  | -2.550922000 | -0.630688000 | -1.991506000 |
| C  | -1.131780000 | 1.094037000  | -1.309118000 |
| C  | -1.140934000 | -0.256689000 | -1.700132000 |
| C  | -2.524540000 | 1.596634000  | -1.398794000 |
| O  | -3.009122000 | -1.702667000 | -2.296578000 |
| O  | -2.960594000 | 2.691728000  | -1.153481000 |
| C  | -4.737136000 | 0.594013000  | -1.951370000 |
| H  | -0.343687000 | 1.813452000  | -1.475159000 |
| H  | -5.089581000 | -0.372782000 | -2.307334000 |
| H  | -5.192530000 | 0.816080000  | -0.982141000 |
| H  | -5.034246000 | 1.375881000  | -2.650742000 |
| H  | -0.341873000 | -0.750751000 | -2.240728000 |

INT-3A

E(RM06) = -1491.18134917

|   |              |              |              |
|---|--------------|--------------|--------------|
| C | 1.155349000  | -2.096505000 | 0.667638000  |
| C | 1.649183000  | -1.175033000 | -0.259657000 |
| C | 2.837472000  | -1.459073000 | -0.918911000 |
| C | 3.515806000  | -2.643003000 | -0.656422000 |
| C | 3.024423000  | -3.549428000 | 0.269809000  |
| C | 1.838403000  | -3.276290000 | 0.926302000  |
| C | -0.201255000 | -1.865187000 | 1.243200000  |
| O | -0.805800000 | -2.717026000 | 1.868870000  |
| N | -0.704484000 | -0.651772000 | 0.846681000  |
| C | -2.059314000 | -0.575265000 | 0.564444000  |
| C | -3.087860000 | -0.775975000 | 1.481532000  |
| C | -4.409312000 | -0.655145000 | 1.085529000  |
| C | -4.744384000 | -0.339469000 | -0.222242000 |
| C | -3.738150000 | -0.160839000 | -1.157555000 |
| C | -2.419305000 | -0.288410000 | -0.762061000 |
| S | -1.087264000 | -0.164665000 | -1.949560000 |
| C | -0.852218000 | -1.919569000 | -2.322230000 |
| H | 1.508444000  | 1.026567000  | -1.573904000 |
| H | 4.439495000  | -2.856091000 | -1.184382000 |
| H | 3.562061000  | -4.468878000 | 0.470084000  |
| H | 1.403898000  | -3.971650000 | 1.637262000  |

|    |              |              |              |
|----|--------------|--------------|--------------|
| H  | 3.241779000  | -0.765266000 | -1.648711000 |
| H  | -2.829140000 | -1.029511000 | 2.501384000  |
| H  | -5.195652000 | -0.804480000 | 1.817061000  |
| H  | -5.782207000 | -0.235855000 | -0.513953000 |
| H  | -3.971788000 | 0.070264000  | -2.191387000 |
| H  | -0.718637000 | -2.485048000 | -1.401139000 |
| H  | -1.725743000 | -2.275496000 | -2.867130000 |
| H  | 0.042698000  | -2.003823000 | -2.937915000 |
| Rh | 0.595782000  | 0.548985000  | -0.370775000 |
| C  | 2.305903000  | 1.696489000  | 0.368891000  |
| C  | 1.615422000  | 1.126318000  | 1.441287000  |
| C  | 0.657362000  | 1.813220000  | 2.368908000  |
| C  | -0.243721000 | 2.858470000  | 1.714817000  |
| C  | -0.721855000 | 2.466087000  | 0.345132000  |
| C  | -0.105171000 | 2.806146000  | -0.815329000 |
| C  | 1.169723000  | 3.588799000  | -0.941041000 |
| C  | 2.280151000  | 3.170135000  | 0.023636000  |
| H  | 3.195410000  | 1.161663000  | 0.051710000  |
| H  | 2.034681000  | 0.210152000  | 1.850017000  |
| H  | -1.722359000 | 2.049851000  | 0.281531000  |
| H  | -0.662005000 | 2.672437000  | -1.738945000 |
| H  | 1.531215000  | 3.468369000  | -1.964713000 |
| H  | 0.955430000  | 4.658982000  | -0.820728000 |
| H  | 3.241633000  | 3.439851000  | -0.418882000 |
| H  | 2.214907000  | 3.743320000  | 0.952969000  |
| H  | 1.218157000  | 2.264990000  | 3.198414000  |
| H  | 0.264704000  | 3.824156000  | 1.656656000  |
| H  | 0.030620000  | 1.036514000  | 2.815067000  |
| H  | -1.113689000 | 3.019079000  | 2.355668000  |

INT-4A

E(RM06) = -1889.85449783

|    |              |              |              |
|----|--------------|--------------|--------------|
| C  | 1.165686000  | -1.368238000 | 1.625788000  |
| C  | 1.586580000  | -0.132976000 | 1.159462000  |
| C  | 2.820253000  | 0.367352000  | 1.550565000  |
| C  | 3.632200000  | -0.392966000 | 2.383679000  |
| C  | 3.221422000  | -1.640899000 | 2.827640000  |
| C  | 1.983942000  | -2.127939000 | 2.448123000  |
| C  | -0.212079000 | -1.801764000 | 1.295582000  |
| O  | -0.703600000 | -2.828815000 | 1.726917000  |
| N  | -0.863990000 | -0.903217000 | 0.493054000  |
| C  | -2.270641000 | -0.987498000 | 0.497748000  |
| C  | -2.939509000 | -0.841907000 | 1.717445000  |
| C  | -4.314986000 | -0.813905000 | 1.804943000  |
| C  | -5.080394000 | -0.942932000 | 0.656545000  |
| C  | -4.446628000 | -1.153808000 | -0.551601000 |
| C  | -3.056992000 | -1.202428000 | -0.644454000 |
| S  | -2.383976000 | -1.539098000 | -2.252036000 |
| H  | 1.325874000  | 2.343908000  | 0.113063000  |
| H  | 4.599121000  | -0.001696000 | 2.681643000  |
| H  | 3.864271000  | -2.224801000 | 3.475815000  |
| H  | 1.611541000  | -3.088863000 | 2.787748000  |
| H  | 3.185941000  | 1.326427000  | 1.197588000  |
| H  | -2.335561000 | -0.752991000 | 2.614439000  |
| H  | -4.790906000 | -0.692101000 | 2.771227000  |
| H  | -6.162369000 | -0.915279000 | 0.706049000  |
| Rh | 0.280295000  | 0.809227000  | -0.036777000 |
| C  | 0.663519000  | 2.894827000  | 0.910221000  |
| C  | -0.291001000 | 1.950951000  | 1.567366000  |
| C  | -1.749583000 | 2.275839000  | 1.709712000  |
| C  | -2.523197000 | 2.522883000  | 0.408508000  |
| C  | -1.898210000 | 1.922282000  | -0.815321000 |

|   |              |              |              |
|---|--------------|--------------|--------------|
| C | -0.919282000 | 2.485329000  | -1.546509000 |
| C | -0.238836000 | 3.799124000  | -1.284200000 |
| C | 0.109552000  | 4.106737000  | 0.170449000  |
| H | 1.474255000  | 3.146475000  | 1.600240000  |
| H | 0.108381000  | 1.527686000  | 2.489713000  |
| H | -2.371524000 | 1.039113000  | -1.226387000 |
| H | -0.709853000 | 2.027520000  | -2.510347000 |
| H | 0.687834000  | 3.824374000  | -1.867739000 |
| H | -0.858413000 | 4.606481000  | -1.693751000 |
| H | 0.856783000  | 4.903181000  | 0.180257000  |
| H | -0.751484000 | 4.499937000  | 0.714530000  |
| H | -1.864096000 | 3.136572000  | 2.383751000  |
| H | -2.655513000 | 3.596236000  | 0.241283000  |
| H | -2.212030000 | 1.438898000  | 2.233896000  |
| H | -3.527367000 | 2.106632000  | 0.519034000  |
| N | 3.163795000  | -0.933091000 | -1.398678000 |
| C | 3.069939000  | 0.432100000  | -1.576553000 |
| C | 0.960945000  | -0.476508000 | -1.934504000 |
| C | 1.644372000  | 0.703716000  | -1.940929000 |
| C | 1.925184000  | -1.552314000 | -1.562867000 |
| O | 3.960503000  | 1.232877000  | -1.468667000 |
| O | 1.733000000  | -2.730022000 | -1.448236000 |
| C | 4.325568000  | -1.622014000 | -0.898539000 |
| H | -0.011692000 | -0.701657000 | -2.354766000 |
| H | 4.633845000  | -2.403562000 | -1.593622000 |
| H | 5.125691000  | -0.891808000 | -0.787005000 |
| H | 4.107332000  | -2.076362000 | 0.070321000  |
| H | 1.399743000  | 1.619842000  | -2.458261000 |
| C | -1.524344000 | -3.098752000 | -1.921155000 |
| H | -2.240574000 | -3.849512000 | -1.590807000 |
| H | -1.071412000 | -3.411290000 | -2.862237000 |
| H | -0.739783000 | -2.971798000 | -1.178271000 |
| H | -5.026415000 | -1.315117000 | -1.453457000 |

TS-2B

E(RM06) = -1889.81082912

|   |              |              |              |
|---|--------------|--------------|--------------|
| C | -0.690401000 | 2.514397000  | -0.730755000 |
| C | -1.427528000 | 1.317583000  | -0.683766000 |
| C | -2.823720000 | 1.409079000  | -0.740782000 |
| C | -3.458260000 | 2.634394000  | -0.765696000 |
| C | -2.706944000 | 3.804437000  | -0.748235000 |
| C | -1.324589000 | 3.743886000  | -0.754215000 |
| C | 0.795032000  | 2.458478000  | -0.794327000 |
| O | 1.457155000  | 3.443473000  | -1.064956000 |
| N | 1.279281000  | 1.202984000  | -0.530017000 |
| C | 2.622547000  | 0.889328000  | -0.658300000 |
| C | 3.534405000  | 1.582676000  | -1.469939000 |
| C | 4.837611000  | 1.150592000  | -1.589474000 |
| C | 5.298079000  | 0.033685000  | -0.905219000 |
| C | 4.426824000  | -0.654779000 | -0.087650000 |
| C | 3.110376000  | -0.233156000 | 0.021824000  |
| S | 1.991519000  | -1.030423000 | 1.149125000  |
| C | 2.261621000  | -2.778347000 | 0.775337000  |
| H | -1.049072000 | 0.417448000  | -1.461587000 |
| H | -4.539649000 | 2.685702000  | -0.822969000 |
| H | -3.207185000 | 4.766014000  | -0.760665000 |
| H | -0.713110000 | 4.638926000  | -0.783003000 |
| H | -3.412712000 | 0.500489000  | -0.826551000 |
| H | 3.194892000  | 2.459593000  | -1.999387000 |
| H | 5.512508000  | 1.699497000  | -2.236225000 |
| H | 6.325861000  | -0.292411000 | -1.003633000 |
| H | 4.770676000  | -1.516858000 | 0.472589000  |

|    |              |              |              |
|----|--------------|--------------|--------------|
| H  | 2.220871000  | -2.964663000 | -0.295603000 |
| H  | 3.228749000  | -3.066174000 | 1.184725000  |
| H  | 1.471467000  | -3.344215000 | 1.265040000  |
| Rh | -0.020241000 | -0.135982000 | 0.375482000  |
| C  | -1.146449000 | 1.580490000  | 2.552354000  |
| C  | 0.060869000  | 1.118262000  | 2.882475000  |
| C  | 0.308014000  | -0.084099000 | 3.745686000  |
| C  | -0.437394000 | -1.383210000 | 3.371574000  |
| C  | -0.846766000 | -1.619400000 | 1.932721000  |
| C  | -1.949092000 | -1.058196000 | 1.340538000  |
| C  | -2.936660000 | -0.150439000 | 2.016339000  |
| C  | -2.413726000 | 0.921941000  | 2.982520000  |
| H  | -1.220600000 | 2.484825000  | 1.955405000  |
| H  | 0.934490000  | 1.689399000  | 2.576410000  |
| H  | -0.495316000 | -2.540359000 | 1.480428000  |
| H  | -2.354147000 | -1.574189000 | 0.472480000  |
| H  | -3.548947000 | 0.332775000  | 1.256833000  |
| H  | -3.627948000 | -0.802520000 | 2.568319000  |
| H  | -3.197059000 | 1.675649000  | 3.095931000  |
| H  | -2.269841000 | 0.487698000  | 3.975485000  |
| H  | 0.059222000  | 0.163647000  | 4.784618000  |
| H  | -1.344389000 | -1.468518000 | 3.979463000  |
| H  | 1.379767000  | -0.285540000 | 3.747675000  |
| H  | 0.192309000  | -2.222455000 | 3.680394000  |
| N  | -1.832491000 | -2.416985000 | -2.015683000 |
| C  | -0.724874000 | -2.564103000 | -1.230994000 |
| C  | -0.515875000 | -0.609618000 | -2.510626000 |
| C  | 0.127786000  | -1.345674000 | -1.452474000 |
| C  | -1.726132000 | -1.285295000 | -2.889163000 |
| O  | -0.513565000 | -3.513765000 | -0.503422000 |
| O  | -2.568983000 | -1.031407000 | -3.716707000 |
| C  | -2.917798000 | -3.355476000 | -2.048766000 |
| H  | -0.009215000 | 0.069336000  | -3.182549000 |
| H  | -2.563536000 | -4.353734000 | -2.313049000 |
| H  | -3.409755000 | -3.419790000 | -1.074272000 |
| H  | -3.628756000 | -3.008449000 | -2.797792000 |
| H  | 1.200843000  | -1.518210000 | -1.486537000 |

TS-3A

E(RM06) = -1889.83748762

|   |              |              |              |
|---|--------------|--------------|--------------|
| C | 1.097365000  | -1.380526000 | 1.610178000  |
| C | 1.611496000  | -0.177365000 | 1.147865000  |
| C | 2.872932000  | 0.236440000  | 1.551094000  |
| C | 3.625918000  | -0.575081000 | 2.390684000  |
| C | 3.126349000  | -1.791419000 | 2.829217000  |
| C | 1.861740000  | -2.190249000 | 2.438668000  |
| C | -0.303070000 | -1.763824000 | 1.280894000  |
| O | -0.796384000 | -2.797510000 | 1.701490000  |
| N | -0.944722000 | -0.837758000 | 0.512845000  |
| C | -2.347264000 | -0.951942000 | 0.466950000  |
| C | -3.059191000 | -0.916703000 | 1.672554000  |
| C | -4.436090000 | -0.908840000 | 1.718794000  |
| C | -5.167808000 | -0.949862000 | 0.541544000  |
| C | -4.494281000 | -1.057546000 | -0.657298000 |
| C | -3.100960000 | -1.085812000 | -0.710007000 |
| S | -2.379631000 | -1.336304000 | -2.314131000 |
| H | 1.538643000  | 1.882243000  | -0.331171000 |
| H | 4.614009000  | -0.248752000 | 2.697013000  |
| H | 3.720955000  | -2.419913000 | 3.481808000  |
| H | 1.420269000  | -3.123894000 | 2.771413000  |
| H | 3.304031000  | 1.169280000  | 1.201607000  |
| H | -2.487206000 | -0.894394000 | 2.594083000  |

|    |              |              |              |
|----|--------------|--------------|--------------|
| H  | -4.940888000 | -0.871093000 | 2.677449000  |
| H  | -6.250975000 | -0.936188000 | 0.560127000  |
| Rh | 0.354284000  | 0.839407000  | -0.056328000 |
| C  | 0.591802000  | 2.729857000  | 1.139762000  |
| C  | -0.365273000 | 1.899347000  | 1.726199000  |
| C  | -1.837910000 | 2.175501000  | 1.727064000  |
| C  | -2.467622000 | 2.555274000  | 0.381368000  |
| C  | -1.783844000 | 1.996310000  | -0.831128000 |
| C  | -0.755678000 | 2.576191000  | -1.480193000 |
| C  | -0.049548000 | 3.841543000  | -1.089978000 |
| C  | 0.231984000  | 4.002956000  | 0.405733000  |
| H  | 1.583484000  | 2.699608000  | 1.579992000  |
| H  | -0.022731000 | 1.277252000  | 2.550278000  |
| H  | -2.250247000 | 1.143086000  | -1.308959000 |
| H  | -0.513936000 | 2.176964000  | -2.462206000 |
| H  | 0.901706000  | 3.882740000  | -1.629041000 |
| H  | -0.623531000 | 4.705506000  | -1.447560000 |
| H  | 1.048428000  | 4.717983000  | 0.525490000  |
| H  | -0.631307000 | 4.450048000  | 0.906859000  |
| H  | -2.038145000 | 2.969173000  | 2.459643000  |
| H  | -2.517533000 | 3.643513000  | 0.280070000  |
| H  | -2.343394000 | 1.291206000  | 2.109879000  |
| H  | -3.501989000 | 2.202148000  | 0.379945000  |
| N  | 3.145997000  | -0.978389000 | -1.402154000 |
| C  | 3.155881000  | 0.388430000  | -1.545938000 |
| C  | 0.953562000  | -0.365744000 | -1.842179000 |
| C  | 1.733761000  | 0.783319000  | -1.850856000 |
| C  | 1.859664000  | -1.510799000 | -1.541221000 |
| O  | 4.106188000  | 1.118029000  | -1.462445000 |
| O  | 1.606657000  | -2.678623000 | -1.464540000 |
| C  | 4.267387000  | -1.763795000 | -0.952366000 |
| H  | 0.012803000  | -0.526135000 | -2.356423000 |
| H  | 4.504154000  | -2.540967000 | -1.679396000 |
| H  | 5.119319000  | -1.096275000 | -0.833704000 |
| H  | 4.033176000  | -2.234976000 | 0.004548000  |
| H  | 1.581609000  | 1.663038000  | -2.461549000 |
| C  | -1.582651000 | -2.939876000 | -2.040238000 |
| H  | -2.338990000 | -3.690137000 | -1.814328000 |
| H  | -1.068626000 | -3.201733000 | -2.965263000 |
| H  | -0.851369000 | -2.883890000 | -1.236172000 |
| H  | -5.042921000 | -1.154759000 | -1.587465000 |

INT-4B

E(RM06) = -1889.89870197

|   |              |              |              |
|---|--------------|--------------|--------------|
| C | 0.797824000  | 2.140665000  | -1.234425000 |
| C | 1.382616000  | 0.923002000  | -0.885959000 |
| C | 2.766887000  | 0.855207000  | -0.858732000 |
| C | 3.539874000  | 1.955034000  | -1.211399000 |
| C | 2.946632000  | 3.137573000  | -1.615619000 |
| C | 1.567942000  | 3.228834000  | -1.618863000 |
| C | -0.660518000 | 2.324165000  | -1.039088000 |
| O | -1.245046000 | 3.323911000  | -1.413721000 |
| N | -1.211586000 | 1.265165000  | -0.353724000 |
| C | -2.501300000 | 1.279010000  | 0.155936000  |
| C | -3.299383000 | 2.437536000  | 0.240348000  |
| C | -4.564353000 | 2.398895000  | 0.783544000  |
| C | -5.117859000 | 1.218258000  | 1.258699000  |
| C | -4.363505000 | 0.068766000  | 1.185127000  |
| C | -3.077031000 | 0.100894000  | 0.662020000  |
| S | -2.162310000 | -1.420214000 | 0.619576000  |
| C | -2.061930000 | -1.858566000 | 2.378199000  |
| H | 1.151262000  | 2.196702000  | 1.229180000  |

|    |              |              |              |    |              |              |              |
|----|--------------|--------------|--------------|----|--------------|--------------|--------------|
| H  | 4.620174000  | 1.881981000  | -1.150644000 | C  | -3.200900000 | -0.780759000 | -0.016348000 |
| H  | 3.555853000  | 3.988729000  | -1.894653000 | S  | -3.373495000 | 0.099308000  | 1.522297000  |
| H  | 1.053187000  | 4.146713000  | -1.882405000 | C  | -4.828270000 | 1.106823000  | 1.133119000  |
| H  | 3.285272000  | -0.035634000 | -0.522124000 | H  | 1.679799000  | 0.184391000  | 2.759208000  |
| H  | -2.899554000 | 3.364272000  | -0.138102000 | H  | 1.902607000  | 4.246931000  | 2.579241000  |
| H  | -5.135441000 | 3.319338000  | 0.831594000  | H  | -0.152069000 | 5.456424000  | 1.919340000  |
| H  | -6.118533000 | 1.195201000  | 1.671549000  | H  | -1.809203000 | 4.306998000  | 0.421958000  |
| H  | -4.764806000 | -0.876305000 | 1.536573000  | H  | 2.366852000  | 2.018857000  | 1.732925000  |
| H  | -2.052872000 | -0.959803000 | 2.992361000  | H  | -1.354685000 | -1.052006000 | -2.836411000 |
| H  | -2.928801000 | -2.466432000 | 2.631794000  | H  | -2.907016000 | -2.897250000 | -3.239172000 |
| H  | -1.137965000 | -2.417379000 | 2.534876000  | H  | -4.682074000 | -3.407732000 | -1.578403000 |
| Rh | -0.062812000 | -0.448054000 | -0.320427000 | H  | -4.835738000 | -2.050726000 | 0.481400000  |
| C  | -0.066613000 | -0.678586000 | -2.717862000 | H  | -4.603537000 | 1.746365000  | 0.279573000  |
| C  | -1.225414000 | -1.232060000 | -2.273843000 | H  | -5.690814000 | 0.470577000  | 0.933040000  |
| C  | -1.459462000 | -2.708361000 | -2.160830000 | H  | -5.029050000 | 1.717110000  | 2.013477000  |
| C  | -0.380206000 | -3.477738000 | -1.382304000 | Rh | 0.732197000  | 0.117622000  | -0.405150000 |
| C  | 0.438890000  | -2.692152000 | -0.383735000 | C  | 1.562773000  | 1.448440000  | -2.318649000 |
| C  | 1.574309000  | -2.005329000 | -0.731578000 | C  | 1.034957000  | 0.277066000  | -2.746193000 |
| C  | 2.102989000  | -1.940948000 | -2.135926000 | C  | 1.750509000  | -1.010519000 | -3.022479000 |
| C  | 1.100640000  | -1.491488000 | -3.207793000 | C  | 2.966927000  | -1.293816000 | -2.136112000 |
| H  | -0.075902000 | 0.372692000  | -2.978599000 | C  | 2.781433000  | -0.956681000 | -0.678920000 |
| H  | -2.101091000 | -0.590978000 | -2.212240000 | C  | 3.068062000  | 0.239476000  | -0.091282000 |
| H  | 0.336507000  | -2.956133000 | 0.663331000  | C  | 3.609621000  | 1.452585000  | -0.783885000 |
| H  | 2.300694000  | -1.820589000 | 0.054668000  | C  | 3.027661000  | 1.743745000  | -2.168640000 |
| H  | 2.963842000  | -1.275908000 | -2.158156000 | H  | 0.885544000  | 2.294526000  | -2.251794000 |
| H  | 2.492816000  | -2.934031000 | -2.395416000 | H  | -0.009701000 | 0.303858000  | -3.036248000 |
| H  | 1.636016000  | -0.905529000 | -3.957042000 | H  | 2.653723000  | -1.808336000 | -0.018918000 |
| H  | 0.706415000  | -2.364657000 | -3.737873000 | H  | 3.166440000  | 0.237447000  | 0.990837000  |
| H  | -1.546292000 | -3.128043000 | -3.170818000 | H  | 3.444883000  | 2.319008000  | -0.142593000 |
| H  | 0.317321000  | -3.944026000 | -2.086024000 | H  | 4.699325000  | 1.346224000  | -0.863487000 |
| H  | -2.429026000 | -2.871478000 | -1.690712000 | H  | 3.189420000  | 2.800780000  | -2.389824000 |
| H  | -0.860532000 | -4.303563000 | -0.853186000 | H  | 3.578980000  | 1.195376000  | -2.935424000 |
| N  | 2.651487000  | -0.331193000 | 2.424935000  | H  | 2.051445000  | -1.051620000 | -4.076969000 |
| C  | 1.407943000  | -0.922953000 | 2.243500000  | H  | 3.847347000  | -0.770449000 | -2.515766000 |
| C  | 1.191396000  | 1.425485000  | 1.995364000  | H  | 1.026835000  | -1.822183000 | -2.890947000 |
| C  | 0.486920000  | 0.109495000  | 1.703250000  | H  | 3.196440000  | -2.358956000 | -2.210890000 |
| C  | 2.621089000  | 1.049846000  | 2.276860000  | N  | 1.282920000  | -2.779606000 | 1.812299000  |
| O  | 1.190176000  | -2.090492000 | 2.492770000  | C  | 0.410432000  | -2.138540000 | 0.939598000  |
| O  | 3.581614000  | 1.757779000  | 2.402844000  | C  | 0.971889000  | -0.644823000 | 2.706686000  |
| C  | 3.849121000  | -1.049383000 | 2.769234000  | C  | 0.186601000  | -0.760373000 | 1.420786000  |
| H  | 0.793252000  | 1.876787000  | 2.911798000  | C  | 1.717850000  | -1.949192000 | 2.837283000  |
| H  | 3.591648000  | -2.100804000 | 2.887835000  | O  | 0.030271000  | -2.622445000 | -0.109303000 |
| H  | 4.598233000  | -0.933598000 | 1.982059000  | O  | 2.557093000  | -2.255018000 | 3.639048000  |
| H  | 4.275189000  | -0.665538000 | 3.697054000  | C  | 1.837335000  | -4.088883000 | 1.583084000  |
| H  | -0.481599000 | 0.055851000  | 2.190934000  | H  | 0.319835000  | -0.530007000 | 3.577411000  |

INT-5A

E(RM06) = -1889.86532146

|   |              |              |              |
|---|--------------|--------------|--------------|
| C | -0.612579000 | 2.570784000  | 0.213320000  |
| C | 0.572410000  | 1.914946000  | 0.531153000  |
| C | 1.459735000  | 2.513921000  | 1.406742000  |
| C | 1.194382000  | 3.787455000  | 1.898144000  |
| C | 0.043278000  | 4.463539000  | 1.532222000  |
| C | -0.867331000 | 3.843594000  | 0.697555000  |
| C | -1.653637000 | 1.814584000  | -0.521672000 |
| O | -2.728153000 | 2.286897000  | -0.847305000 |
| N | -1.252215000 | 0.533554000  | -0.737010000 |
| C | -2.193262000 | -0.481054000 | -0.954759000 |
| C | -2.120075000 | -1.269559000 | -2.102695000 |
| C | -2.997360000 | -2.308627000 | -2.333650000 |
| C | -3.988695000 | -2.592049000 | -1.411439000 |
| C | -4.078011000 | -1.829215000 | -0.262716000 |

INT-6A

E(RM06) = -1976.64368414

|   |             |              |              |
|---|-------------|--------------|--------------|
| C | 2.038417000 | -1.224421000 | -1.315513000 |
| C | 1.232403000 | -1.861263000 | -0.387173000 |
| C | 1.419144000 | -3.199504000 | -0.094902000 |
| C | 2.441303000 | -3.890306000 | -0.732737000 |
| C | 3.260312000 | -3.254793000 | -1.655226000 |
| C | 3.058950000 | -1.920096000 | -1.948921000 |
| C | 1.792815000 | 0.206570000  | -1.595537000 |
| O | 2.483931000 | 0.844512000  | -2.367899000 |
| N | 0.713564000 | 0.697232000  | -0.880392000 |
| C | 0.157629000 | 1.957036000  | -1.087009000 |

|    |              |              |              |    |              |              |              |
|----|--------------|--------------|--------------|----|--------------|--------------|--------------|
| C  | 0.775379000  | 2.967983000  | -1.847444000 | C  | 4.557898000  | -1.355246000 | 0.242415000  |
| C  | 0.176436000  | 4.195891000  | -2.030478000 | C  | 3.183735000  | -1.486445000 | 0.393298000  |
| C  | -1.064371000 | 4.487276000  | -1.487316000 | S  | 2.555794000  | -1.897721000 | 2.007682000  |
| C  | -1.691964000 | 3.517309000  | -0.737800000 | C  | 3.009193000  | -3.653166000 | 2.055708000  |
| C  | -1.087500000 | 2.286881000  | -0.521520000 | H  | 2.471897000  | 0.772921000  | 0.796159000  |
| S  | -1.962367000 | 1.123172000  | 0.500068000  | H  | -4.545323000 | -3.378806000 | 0.822477000  |
| C  | -2.138049000 | 2.040975000  | 2.052389000  | H  | -3.123610000 | -5.362681000 | 0.384436000  |
| H  | -2.445737000 | -0.033206000 | -2.149044000 | H  | -0.720296000 | -5.000813000 | -0.250875000 |
| H  | 2.602173000  | -4.937535000 | -0.500097000 | H  | -3.672655000 | -1.150177000 | 0.577795000  |
| H  | 4.057134000  | -3.805560000 | -2.140435000 | H  | 2.285134000  | -0.881139000 | -2.801539000 |
| H  | 3.679495000  | -1.389291000 | -2.662850000 | H  | 4.709488000  | -0.619775000 | -3.046205000 |
| H  | 0.786165000  | -3.704641000 | 0.627949000  | H  | 6.190984000  | -0.927993000 | -1.076126000 |
| H  | 1.735725000  | 2.761950000  | -2.290144000 | H  | 5.190514000  | -1.502143000 | 1.111083000  |
| H  | 0.697419000  | 4.942555000  | -2.619095000 | H  | 2.562871000  | -4.163318000 | 1.201922000  |
| H  | -1.534344000 | 5.449543000  | -1.646039000 | H  | 4.093199000  | -3.767664000 | 2.052858000  |
| H  | -2.668904000 | 3.707867000  | -0.306641000 | H  | 2.608325000  | -4.054275000 | 2.986173000  |
| H  | -1.192160000 | 2.511250000  | 2.323681000  | Rh | -0.591157000 | 0.070396000  | -0.539705000 |
| H  | -2.919774000 | 2.789570000  | 1.933764000  | C  | -1.302393000 | -0.751111000 | -2.504787000 |
| H  | -2.451550000 | 1.323029000  | 2.812034000  | C  | -0.402089000 | 0.267598000  | -2.767239000 |
| Rh | -0.178238000 | -0.619464000 | 0.377891000  | C  | -0.734417000 | 1.623046000  | -3.302879000 |
| N  | -3.416797000 | -1.857059000 | 0.166408000  | C  | -1.879193000 | 2.317567000  | -2.582475000 |
| C  | -2.067375000 | -2.044551000 | 0.220034000  | C  | -1.987865000 | 1.940782000  | -1.132041000 |
| C  | -2.545104000 | -1.089333000 | -1.881031000 | C  | -2.791687000 | 0.906525000  | -0.743467000 |
| C  | -1.433161000 | -1.636136000 | -1.022309000 | C  | -3.607138000 | 0.137952000  | -1.747587000 |
| C  | -3.798131000 | -1.254812000 | -1.048914000 | C  | -2.788606000 | -0.691955000 | -2.744618000 |
| O  | -1.428614000 | -2.290816000 | 1.260627000  | H  | -0.881239000 | -1.749170000 | -2.512959000 |
| O  | -4.916132000 | -0.922371000 | -1.304607000 | H  | 0.617848000  | -0.053573000 | -2.938926000 |
| C  | -4.285188000 | -1.936211000 | 1.314123000  | H  | -1.665366000 | 2.674590000  | -0.405543000 |
| H  | -2.660379000 | -1.633403000 | -2.821042000 | H  | -3.121074000 | 0.867082000  | 0.289059000  |
| H  | -3.981184000 | -1.207817000 | 2.070633000  | H  | -4.303344000 | -0.517019000 | -1.231141000 |
| H  | -5.297672000 | -1.715426000 | 0.981048000  | H  | -4.231425000 | 0.859917000  | -2.285454000 |
| H  | -4.246821000 | -2.931540000 | 1.755355000  | H  | -3.163171000 | -1.717031000 | -2.736579000 |
| H  | -0.773899000 | -2.362451000 | -1.484173000 | H  | -2.941969000 | -0.319279000 | -3.764771000 |
| N  | 2.634037000  | 1.172184000  | 1.551103000  | H  | -0.960746000 | 1.512914000  | -4.372333000 |
| C  | 2.755089000  | -0.212494000 | 1.604410000  | H  | -2.827548000 | 2.084570000  | -3.075088000 |
| C  | 0.626943000  | 0.353291000  | 2.328098000  | H  | 0.149371000  | 2.258709000  | -3.245817000 |
| C  | 1.421803000  | -0.723799000 | 2.061541000  | H  | -1.733594000 | 3.393448000  | -2.648831000 |
| C  | 1.396243000  | 1.593656000  | 1.998362000  | N  | 1.526691000  | 3.738388000  | 0.440465000  |
| O  | 3.749682000  | -0.833090000 | 1.367231000  | C  | 0.831722000  | 3.195082000  | -0.635073000 |
| O  | 1.039861000  | 2.736005000  | 2.117859000  | C  | 2.421717000  | 1.628225000  | 0.123719000  |
| C  | 3.625647000  | 2.035796000  | 0.957461000  | C  | 1.196552000  | 1.755783000  | -0.770984000 |
| H  | -0.241906000 | 0.380537000  | 2.968627000  | C  | 2.485966000  | 2.889488000  | 0.945268000  |
| H  | 3.372198000  | 3.064439000  | 1.207587000  | O  | 0.106356000  | 3.880472000  | -1.320569000 |
| H  | 4.611441000  | 1.788127000  | 1.349428000  | O  | 3.224960000  | 3.133593000  | 1.861249000  |
| H  | 3.634979000  | 1.916922000  | -0.129855000 | C  | 1.312980000  | 5.085724000  | 0.899825000  |
| H  | 1.304718000  | -1.739879000 | 2.412051000  | H  | 3.343160000  | 1.563401000  | -0.464927000 |

### INT-6C

E(RM06) = -2288.49039981

|   |              |              |              |   |              |              |              |
|---|--------------|--------------|--------------|---|--------------|--------------|--------------|
| C | -0.900861000 | -2.888439000 | -0.246910000 | H | 2.017256000  | 5.277243000  | 1.707583000  |
| C | -1.706186000 | -1.771953000 | -0.077807000 | H | 1.434774000  | 1.540216000  | -1.806833000 |
| C | -3.013765000 | -1.973405000 | 0.332355000  | N | -2.267944000 | 1.165004000  | 2.569284000  |
| C | -3.519092000 | -3.255647000 | 0.494089000  | C | -1.222913000 | 1.902965000  | 2.033914000  |
| C | -2.723403000 | -4.363475000 | 0.261261000  | C | -0.673200000 | -0.350958000 | 1.862649000  |
| C | -1.404003000 | -4.173366000 | -0.094762000 | C | -0.190260000 | 0.904038000  | 1.616480000  |
| C | 0.536116000  | -2.711446000 | -0.536238000 | C | -1.990091000 | -0.199499000 | 2.563109000  |
| O | 1.289710000  | -3.661522000 | -0.686395000 | O | -1.184380000 | 3.100036000  | 1.953995000  |
| N | 0.932031000  | -1.407400000 | -0.587299000 | O | -2.662281000 | -1.031954000 | 3.097768000  |
| C | 2.333852000  | -1.264206000 | -0.702016000 | C | -3.484985000 | 1.722925000  | 3.098613000  |
| C | 2.920879000  | -0.974263000 | -1.929534000 | H | -0.082117000 | -1.252912000 | 1.948714000  |
| C | 4.289368000  | -0.848129000 | -2.073582000 | H | -3.429757000 | 2.805735000  | 2.999806000  |
| C | 5.116847000  | -1.030970000 | -0.979400000 | H | -4.350550000 | 1.346815000  | 2.547723000  |
|   |              |              |              | H | -3.604086000 | 1.452967000  | 4.148331000  |

H 0.847866000 1.172071000 1.591064000

TS-4A

E(RM06) = -1976.61884323

|    |              |              |              |
|----|--------------|--------------|--------------|
| C  | -1.161031000 | 2.460563000  | 0.910775000  |
| C  | -1.766857000 | 1.256176000  | 0.529621000  |
| C  | -2.974153000 | 0.884459000  | 1.107204000  |
| C  | -3.584143000 | 1.722224000  | 2.025548000  |
| C  | -3.005008000 | 2.934563000  | 2.367397000  |
| C  | -1.787942000 | 3.297864000  | 1.815137000  |
| C  | 0.214261000  | 2.781632000  | 0.446396000  |
| O  | 0.673900000  | 3.904855000  | 0.531710000  |
| N  | 0.866297000  | 1.667820000  | -0.022552000 |
| C  | 2.190884000  | 1.662320000  | -0.443692000 |
| C  | 2.945968000  | 2.817727000  | -0.706857000 |
| C  | 4.248477000  | 2.723185000  | -1.149357000 |
| C  | 4.865863000  | 1.495421000  | -1.336657000 |
| C  | 4.149660000  | 0.347706000  | -1.072848000 |
| C  | 2.832027000  | 0.431851000  | -0.648988000 |
| S  | 1.958404000  | -1.067338000 | -0.259733000 |
| C  | 2.097513000  | -2.008055000 | -1.794907000 |
| H  | 1.883447000  | -0.456507000 | 2.945836000  |
| H  | -4.526651000 | 1.425484000  | 2.470948000  |
| H  | -3.495865000 | 3.588821000  | 3.078037000  |
| H  | -1.285821000 | 4.218581000  | 2.091005000  |
| H  | -3.444489000 | -0.054443000 | 0.845849000  |
| H  | 2.484597000  | 3.780663000  | -0.557326000 |
| H  | 4.795700000  | 3.636883000  | -1.351461000 |
| H  | 5.892552000  | 1.434115000  | -1.674839000 |
| H  | 4.614115000  | -0.625743000 | -1.186657000 |
| H  | 1.801996000  | -1.406648000 | -2.651100000 |
| H  | 3.119273000  | -2.372663000 | -1.891814000 |
| H  | 1.414112000  | -2.852604000 | -1.706214000 |
| Rh | -0.168074000 | -0.072910000 | 0.022871000  |
| N  | 0.272642000  | -2.886782000 | 1.874060000  |
| C  | -0.542327000 | -1.838317000 | 1.506253000  |
| C  | 0.960248000  | -1.020939000 | 3.109541000  |
| C  | -0.177507000 | -0.646036000 | 2.202483000  |
| C  | 1.228928000  | -2.478104000 | 2.808437000  |
| O  | -1.306151000 | -1.884017000 | 0.505464000  |
| O  | 2.105632000  | -3.183587000 | 3.218103000  |
| C  | 0.358779000  | -4.143717000 | 1.174486000  |
| H  | 0.717137000  | -0.910814000 | 4.169901000  |
| H  | -0.183074000 | -4.052173000 | 0.232983000  |
| H  | 1.407830000  | -4.381097000 | 0.988988000  |
| H  | -0.076614000 | -4.954300000 | 1.760637000  |
| H  | -0.950757000 | 0.023268000  | 2.557160000  |
| N  | -2.467211000 | -1.034566000 | -2.372139000 |
| C  | -1.101784000 | -0.956826000 | -2.656450000 |
| C  | -1.718632000 | 0.946938000  | -1.416084000 |
| C  | -0.606796000 | 0.287012000  | -2.033782000 |
| C  | -2.933263000 | 0.082246000  | -1.719952000 |
| O  | -0.506696000 | -1.763714000 | -3.323446000 |
| O  | -4.086439000 | 0.319066000  | -1.492533000 |
| C  | -3.310423000 | -2.141584000 | -2.738775000 |
| H  | -1.863902000 | 2.011353000  | -1.559167000 |
| H  | -2.740444000 | -2.792259000 | -3.399504000 |
| H  | -3.618954000 | -2.699451000 | -1.852334000 |
| H  | -4.201747000 | -1.778277000 | -3.250366000 |
| H  | 0.205905000  | 0.820195000  | -2.513560000 |

TS-4C

E(RM06) = -2288.48768209

|    |              |              |              |
|----|--------------|--------------|--------------|
| C  | -0.556070000 | -2.877651000 | -0.322198000 |
| C  | -1.461201000 | -1.866116000 | -0.025077000 |
| C  | -2.768961000 | -2.219462000 | 0.272281000  |
| C  | -3.179001000 | -3.540513000 | 0.204114000  |
| C  | -2.281154000 | -4.536070000 | -0.144673000 |
| C  | -0.964686000 | -4.201006000 | -0.394661000 |
| C  | 0.865299000  | -2.546290000 | -0.573322000 |
| O  | 1.705666000  | -3.421201000 | -0.721605000 |
| N  | 1.130403000  | -1.210267000 | -0.604338000 |
| C  | 2.512219000  | -0.925355000 | -0.706505000 |
| C  | 3.072250000  | -0.541345000 | -1.920358000 |
| C  | 4.419604000  | -0.262071000 | -2.047725000 |
| C  | 5.254234000  | -0.380703000 | -0.950467000 |
| C  | 4.725422000  | -0.795227000 | 0.257315000  |
| C  | 3.373282000  | -1.081544000 | 0.391323000  |
| S  | 2.781361000  | -1.594468000 | 1.990356000  |
| C  | 3.473992000  | -3.268243000 | 2.036715000  |
| H  | 2.280447000  | 0.989281000  | 0.924325000  |
| H  | -4.206321000 | -3.790356000 | 0.444445000  |
| H  | -2.604144000 | -5.568895000 | -0.197208000 |
| H  | -0.215904000 | -4.944649000 | -0.644506000 |
| H  | -3.494627000 | -1.483204000 | 0.598836000  |
| H  | 2.435910000  | -0.493051000 | -2.795157000 |
| H  | 4.818325000  | 0.036926000  | -3.010097000 |
| H  | 6.311079000  | -0.157347000 | -1.033783000 |
| H  | 5.364339000  | -0.891681000 | 1.128455000  |
| H  | 3.111955000  | -3.830836000 | 1.177233000  |
| H  | 4.563327000  | -3.233392000 | 2.046455000  |
| H  | 3.121988000  | -3.726638000 | 2.960434000  |
| Rh | -0.537029000 | 0.110146000  | -0.585409000 |
| C  | -1.150201000 | -0.779333000 | -2.567179000 |
| C  | -0.356628000 | 0.322028000  | -2.819138000 |
| C  | -0.810472000 | 1.652503000  | -3.328598000 |
| C  | -2.019036000 | 2.222239000  | -2.602502000 |
| C  | -2.092532000 | 1.821476000  | -1.155504000 |
| C  | -2.791908000 | 0.707896000  | -0.779212000 |
| C  | -3.528204000 | -0.131802000 | -1.787375000 |
| C  | -2.636891000 | -0.872578000 | -2.792549000 |
| H  | -0.631763000 | -1.730933000 | -2.567113000 |
| H  | 0.690882000  | 0.105654000  | -2.990204000 |
| H  | -1.864589000 | 2.572812000  | -0.410811000 |
| H  | -3.129699000 | 0.635518000  | 0.249568000  |
| H  | -4.156817000 | -0.853430000 | -1.271687000 |
| H  | -4.221610000 | 0.529562000  | -2.318974000 |
| H  | -2.903797000 | -1.931390000 | -2.780561000 |
| H  | -2.842121000 | -0.520114000 | -3.810630000 |
| H  | -1.017937000 | 1.552369000  | -4.402576000 |
| H  | -2.939931000 | 1.899185000  | -3.097590000 |
| H  | 0.010271000  | 2.365219000  | -3.242700000 |
| H  | -1.982961000 | 3.308159000  | -2.661235000 |
| N  | 0.938846000  | 3.828752000  | 0.623563000  |
| C  | 0.499879000  | 3.290259000  | -0.580812000 |
| C  | 2.151089000  | 1.883965000  | 0.319813000  |
| C  | 1.024155000  | 1.898441000  | -0.704742000 |
| C  | 1.908839000  | 3.060841000  | 1.228420000  |
| O  | -0.162616000 | 3.941693000  | -1.356170000 |
| O  | 2.448379000  | 3.309375000  | 2.273321000  |
| C  | 0.478170000  | 5.097140000  | 1.123343000  |
| H  | 3.123769000  | 2.031570000  | -0.164312000 |
| H  | 0.676404000  | 5.887093000  | 0.397890000  |
| H  | -0.595106000 | 5.053822000  | 1.313520000  |

|   |              |              |              |
|---|--------------|--------------|--------------|
| H | 1.007997000  | 5.300570000  | 2.052339000  |
| H | 1.385806000  | 1.731823000  | -1.715197000 |
| N | -2.449099000 | 0.549947000  | 2.626260000  |
| C | -1.561478000 | 1.469802000  | 2.068721000  |
| C | -0.691699000 | -0.671546000 | 1.760978000  |
| C | -0.409419000 | 0.675769000  | 1.557949000  |
| C | -1.957769000 | -0.746344000 | 2.571007000  |
| O | -1.734232000 | 2.657899000  | 2.042557000  |
| O | -2.432629000 | -1.686185000 | 3.139185000  |
| C | -3.701146000 | 0.894037000  | 3.248108000  |
| H | 0.069962000  | -1.431834000 | 1.873302000  |
| H | -3.711754000 | 0.570529000  | 4.289345000  |
| H | -3.816245000 | 1.975402000  | 3.195584000  |
| H | -4.531852000 | 0.409014000  | 2.729554000  |
| H | 0.581790000  | 1.077285000  | 1.669167000  |

INT-7A

E(RM06) = -1976.64957035

|    |              |              |              |
|----|--------------|--------------|--------------|
| C  | 1.163757000  | -1.408663000 | 1.876123000  |
| C  | 2.082485000  | -0.856188000 | 0.952899000  |
| C  | 2.977337000  | 0.116775000  | 1.435481000  |
| C  | 2.994113000  | 0.483088000  | 2.758828000  |
| C  | 2.141893000  | -0.138893000 | 3.668152000  |
| C  | 1.233371000  | -1.071799000 | 3.227223000  |
| C  | 0.035208000  | -2.313849000 | 1.461172000  |
| O  | -0.141598000 | -3.411631000 | 1.947411000  |
| N  | -0.729340000 | -1.643377000 | 0.569322000  |
| C  | -1.932980000 | -2.048608000 | 0.030209000  |
| C  | -2.527897000 | -3.298608000 | 0.249915000  |
| C  | -3.733781000 | -3.601234000 | -0.346960000 |
| C  | -4.392053000 | -2.689879000 | -1.162444000 |
| C  | -3.826282000 | -1.450176000 | -1.378816000 |
| C  | -2.607636000 | -1.143548000 | -0.794777000 |
| S  | -1.895615000 | 0.474656000  | -1.013976000 |
| C  | -1.696198000 | 0.530907000  | -2.807091000 |
| H  | -2.680972000 | 1.482001000  | 2.222033000  |
| H  | 3.695310000  | 1.235852000  | 3.097344000  |
| H  | 2.186500000  | 0.121025000  | 4.719349000  |
| H  | 0.545034000  | -1.554383000 | 3.911442000  |
| H  | 3.689373000  | 0.569653000  | 0.756974000  |
| H  | -2.020734000 | -4.009510000 | 0.885920000  |
| H  | -4.173987000 | -4.575805000 | -0.169673000 |
| H  | -5.342173000 | -2.940942000 | -1.616742000 |
| H  | -4.333598000 | -0.712830000 | -1.991670000 |
| H  | -1.209775000 | -0.371234000 | -3.168730000 |
| H  | -2.686367000 | 0.653136000  | -3.246121000 |
| H  | -1.067028000 | 1.389603000  | -3.033305000 |
| Rh | 0.057574000  | 0.157285000  | 0.124408000  |
| N  | -1.056939000 | 3.348912000  | 0.337993000  |
| C  | -0.095815000 | 2.416265000  | 0.693434000  |
| C  | -1.861584000 | 2.207415000  | 2.212410000  |
| C  | -0.526676000 | 1.654518000  | 1.804134000  |
| C  | -2.169815000 | 3.260444000  | 1.169190000  |
| O  | 0.896525000  | 2.153204000  | -0.045201000 |
| O  | -3.179552000 | 3.889402000  | 1.013516000  |
| C  | -1.057870000 | 4.089395000  | -0.897531000 |
| H  | -1.855578000 | 2.677977000  | 3.200308000  |
| H  | -0.820598000 | 5.141628000  | -0.731784000 |
| H  | -0.306567000 | 3.656579000  | -1.559066000 |
| H  | -2.048190000 | 4.030787000  | -1.352774000 |
| H  | 0.192406000  | 1.312660000  | 2.537916000  |
| N  | 3.132655000  | -0.088275000 | -2.125890000 |

|   |             |              |              |
|---|-------------|--------------|--------------|
| C | 1.753095000 | -0.065262000 | -2.353781000 |
| C | 2.227904000 | -1.444575000 | -0.457971000 |
| C | 1.107471000 | -0.926243000 | -1.336099000 |
| C | 3.504500000 | -0.946809000 | -1.115970000 |
| O | 1.262029000 | 0.549015000  | -3.268296000 |
| O | 4.633815000 | -1.210520000 | -0.802676000 |
| C | 4.064961000 | 0.631209000  | -2.955339000 |
| H | 2.276739000 | -2.534474000 | -0.381606000 |
| H | 3.990024000 | 0.299985000  | -3.992051000 |
| H | 3.847541000 | 1.699127000  | -2.921412000 |
| H | 5.068548000 | 0.440425000  | -2.579394000 |
| H | 0.453643000 | -1.674250000 | -1.784048000 |

INT-7C

E(RM06) = -2288.55949859

|    |              |              |              |
|----|--------------|--------------|--------------|
| C  | -0.287467000 | -2.668412000 | -0.354780000 |
| C  | -1.103923000 | -2.338088000 | 0.737160000  |
| C  | -2.327518000 | -2.995982000 | 0.868122000  |
| C  | -2.739114000 | -3.944653000 | -0.046263000 |
| C  | -1.928489000 | -4.270230000 | -1.124855000 |
| C  | -0.712024000 | -3.641070000 | -1.263401000 |
| C  | 1.132360000  | -2.198617000 | -0.529977000 |
| O  | 1.999660000  | -3.052850000 | -0.650171000 |
| N  | 1.322181000  | -0.869077000 | -0.604744000 |
| C  | 2.661058000  | -0.449684000 | -0.749531000 |
| C  | 3.090231000  | 0.058758000  | -1.971120000 |
| C  | 4.378374000  | 0.522986000  | -2.156706000 |
| C  | 5.283131000  | 0.474628000  | -1.110663000 |
| C  | 4.884044000  | -0.053891000 | 0.102783000  |
| C  | 3.592300000  | -0.527063000 | 0.298127000  |
| S  | 3.169199000  | -1.157904000 | 1.909610000  |
| C  | 3.981923000  | -2.776063000 | 1.811416000  |
| H  | 1.962891000  | 1.189570000  | 0.998511000  |
| H  | -3.690288000 | -4.445037000 | 0.093111000  |
| H  | -2.237242000 | -5.027455000 | -1.835763000 |
| H  | -0.033003000 | -3.918693000 | -2.062316000 |
| H  | -2.958538000 | -2.793116000 | 1.725302000  |
| H  | 2.392682000  | 0.054355000  | -2.800245000 |
| H  | 4.677370000  | 0.912475000  | -3.122936000 |
| H  | 6.294549000  | 0.841485000  | -1.237976000 |
| H  | 5.578982000  | -0.097655000 | 0.934539000  |
| H  | 3.585098000  | -3.330303000 | 0.960903000  |
| H  | 5.062058000  | -2.653687000 | 1.728928000  |
| H  | 3.750322000  | -3.296832000 | 2.740222000  |
| Rh | -0.480931000 | 0.188718000  | -0.751739000 |
| C  | -0.818936000 | -0.562602000 | -3.083669000 |
| C  | -0.356490000 | 0.699110000  | -3.204310000 |
| C  | -1.167005000 | 1.935414000  | -3.425851000 |
| C  | -2.478727000 | 2.013944000  | -2.645375000 |
| C  | -2.444357000 | 1.453689000  | -1.248835000 |
| C  | -2.753775000 | 0.159892000  | -0.948974000 |
| C  | -3.079376000 | -0.923468000 | -1.933490000 |
| C  | -2.261460000 | -0.955796000 | -3.230396000 |
| H  | -0.084439000 | -1.363311000 | -3.051900000 |
| H  | 0.717552000  | 0.827584000  | -3.284429000 |
| H  | -2.464966000 | 2.160640000  | -0.430112000 |
| H  | -3.054321000 | -0.060474000 | 0.072764000  |
| H  | -2.984291000 | -1.885458000 | -1.427995000 |
| H  | -4.145505000 | -0.837062000 | -2.183886000 |
| H  | -2.305082000 | -1.973242000 | -3.626599000 |
| H  | -2.723332000 | -0.318056000 | -3.987541000 |
| H  | -1.372019000 | 2.037149000  | -4.499523000 |



|   |              |              |              |
|---|--------------|--------------|--------------|
| H | -3.278551000 | 1.512651000  | -3.197970000 |
| H | -0.561733000 | 2.801993000  | -3.153943000 |
| H | -2.759837000 | 3.064792000  | -2.574984000 |
| N | 0.080463000  | 3.751564000  | 1.000475000  |
| C | -0.220667000 | 3.300869000  | -0.269430000 |
| C | 1.660090000  | 2.123522000  | 0.538615000  |
| C | 0.595397000  | 2.063285000  | -0.541733000 |
| C | 1.127962000  | 3.065646000  | 1.584900000  |
| O | -0.976259000 | 3.886078000  | -1.006019000 |
| O | 1.529201000  | 3.230720000  | 2.703382000  |
| C | -0.656806000 | 4.807886000  | 1.642224000  |
| H | 2.583432000  | 2.556509000  | 0.133304000  |
| H | -0.592027000 | 5.726434000  | 1.057926000  |
| H | -1.704655000 | 4.519075000  | 1.735124000  |
| H | -0.226535000 | 4.961620000  | 2.630182000  |
| H | 1.009840000  | 2.106532000  | -1.547639000 |
| N | -2.203179000 | -0.096353000 | 2.974782000  |
| C | -1.707931000 | 0.780864000  | 2.013730000  |
| C | -0.622198000 | -1.355950000 | 1.789000000  |
| C | -0.574947000 | 0.095690000  | 1.314238000  |
| C | -1.552910000 | -1.317135000 | 2.986182000  |
| O | -2.128046000 | 1.901003000  | 1.861602000  |
| O | -1.746570000 | -2.175731000 | 3.801589000  |
| C | -3.202279000 | 0.258541000  | 3.951430000  |
| H | 0.367154000  | -1.681425000 | 2.128879000  |
| H | -3.575434000 | 1.250688000  | 3.705194000  |
| H | -4.018455000 | -0.464700000 | 3.934389000  |
| H | -2.771665000 | 0.263380000  | 4.953697000  |
| H | 0.331735000  | 0.560937000  | 1.699234000  |

TS-5A

E(RM06) = -1976.60609068

|    |              |              |              |
|----|--------------|--------------|--------------|
| C  | -2.069638000 | -1.902826000 | -0.214840000 |
| C  | -2.908942000 | -0.820958000 | -0.514994000 |
| C  | -3.917307000 | -1.001861000 | -1.465919000 |
| C  | -4.093939000 | -2.205119000 | -2.115439000 |
| C  | -3.266124000 | -3.272269000 | -1.810215000 |
| C  | -2.277388000 | -3.116585000 | -0.859656000 |
| C  | -0.951230000 | -1.908707000 | 0.788884000  |
| O  | -0.965097000 | -2.752778000 | 1.664478000  |
| N  | 0.070863000  | -1.021085000 | 0.602686000  |
| C  | 1.077782000  | -1.014291000 | 1.587916000  |
| C  | 0.823674000  | -0.705141000 | 2.919380000  |
| C  | 1.860083000  | -0.686364000 | 3.835073000  |
| C  | 3.161852000  | -0.979229000 | 3.456496000  |
| C  | 3.429198000  | -1.301216000 | 2.137863000  |
| C  | 2.390021000  | -1.315307000 | 1.224136000  |
| S  | 2.671445000  | -1.711929000 | -0.487104000 |
| C  | 2.113905000  | -3.440468000 | -0.513850000 |
| H  | 1.622499000  | 0.112100000  | -2.814960000 |
| H  | -4.888053000 | -2.315200000 | -2.844204000 |
| H  | -3.399912000 | -4.228375000 | -2.302300000 |
| H  | -1.640774000 | -3.951555000 | -0.588612000 |
| H  | -4.592441000 | -0.177642000 | -1.668335000 |
| H  | -0.194046000 | -0.485259000 | 3.218407000  |
| H  | 1.646502000  | -0.434214000 | 4.867486000  |
| H  | 3.964578000  | -0.953446000 | 4.183105000  |
| H  | 4.436911000  | -1.532782000 | 1.811105000  |
| H  | 2.042439000  | -3.746207000 | -1.556782000 |
| H  | 2.850721000  | -4.050602000 | 0.006784000  |
| H  | 1.143316000  | -3.522462000 | -0.025265000 |
| Rh | 0.772821000  | -0.375798000 | -1.190041000 |

|   |              |              |              |
|---|--------------|--------------|--------------|
| N | 2.103552000  | 2.574262000  | -0.993903000 |
| C | 0.759669000  | 2.332275000  | -0.702846000 |
| C | 1.338658000  | 1.236346000  | -2.748307000 |
| C | 0.206306000  | 1.496790000  | -1.815924000 |
| C | 2.531719000  | 1.973440000  | -2.161115000 |
| O | 0.196898000  | 2.745985000  | 0.272774000  |
| O | 3.640302000  | 2.014015000  | -2.611779000 |
| C | 2.975199000  | 3.261908000  | -0.074189000 |
| H | 1.179162000  | 1.460132000  | -3.804387000 |
| H | 2.575231000  | 4.249657000  | 0.154088000  |
| H | 3.058704000  | 2.699023000  | 0.858318000  |
| H | 3.954158000  | 3.352996000  | -0.540606000 |
| H | -0.735630000 | 1.867076000  | -2.213731000 |
| N | -2.504418000 | 2.152096000  | 1.685705000  |
| C | -2.784415000 | 2.779022000  | 0.476209000  |
| C | -2.789859000 | 0.503973000  | 0.085586000  |
| C | -2.982381000 | 1.685674000  | -0.504797000 |
| C | -2.490870000 | 0.781905000  | 1.538609000  |
| O | -2.859244000 | 3.962262000  | 0.296709000  |
| O | -2.318686000 | -0.013021000 | 2.421196000  |
| C | -2.111186000 | 2.832343000  | 2.889473000  |
| H | -0.679402000 | 0.164397000  | -1.461328000 |
| H | -1.073489000 | 2.597111000  | 3.136276000  |
| H | -2.204359000 | 3.902351000  | 2.711078000  |
| H | -2.749044000 | 2.539906000  | 3.724353000  |
| H | -3.229251000 | 1.886146000  | -1.538632000 |

TS-5C

E(RM06) = -2288.53415209

|    |              |              |              |
|----|--------------|--------------|--------------|
| C  | 2.132855000  | 1.921780000  | 0.773043000  |
| C  | 2.360676000  | 1.901609000  | -0.606409000 |
| C  | 2.633951000  | 3.099267000  | -1.268238000 |
| C  | 2.725857000  | 4.293353000  | -0.578607000 |
| C  | 2.578073000  | 4.298125000  | 0.798588000  |
| C  | 2.287881000  | 3.119750000  | 1.460891000  |
| C  | 1.691582000  | 0.751440000  | 1.607420000  |
| O  | 2.366627000  | 0.453949000  | 2.582115000  |
| N  | 0.520836000  | 0.154480000  | 1.282182000  |
| C  | 0.111817000  | -0.875485000 | 2.165356000  |
| C  | -0.829088000 | -0.578115000 | 3.149781000  |
| C  | -1.305191000 | -1.540640000 | 4.018378000  |
| C  | -0.838827000 | -2.837917000 | 3.927341000  |
| C  | 0.108832000  | -3.149785000 | 2.969940000  |
| C  | 0.598138000  | -2.189477000 | 2.095287000  |
| S  | 1.839461000  | -2.683294000 | 0.922063000  |
| C  | 3.303855000  | -2.610408000 | 1.989302000  |
| H  | -0.886780000 | -0.588325000 | -3.056723000 |
| H  | 2.948234000  | 5.210205000  | -1.111353000 |
| H  | 2.684571000  | 5.220961000  | 1.356577000  |
| H  | 2.157502000  | 3.108129000  | 2.537447000  |
| H  | 2.819974000  | 3.072497000  | -2.336715000 |
| H  | -1.163177000 | 0.447623000  | 3.251305000  |
| H  | -2.036795000 | -1.272409000 | 4.771663000  |
| H  | -1.206328000 | -3.605228000 | 4.598126000  |
| H  | 0.490180000  | -4.161846000 | 2.886914000  |
| H  | 3.388115000  | -1.612256000 | 2.418302000  |
| H  | 3.237516000  | -3.370058000 | 2.768528000  |
| H  | 4.166878000  | -2.804813000 | 1.352530000  |
| Rh | -1.147971000 | 0.683992000  | 0.134045000  |
| C  | -0.974136000 | 3.010104000  | 0.356556000  |
| C  | -1.538271000 | 2.485825000  | 1.486443000  |
| C  | -3.001887000 | 2.387051000  | 1.800799000  |

|   |              |              |              |
|---|--------------|--------------|--------------|
| C | -3.884583000 | 2.097979000  | 0.587112000  |
| C | -3.279560000 | 1.104433000  | -0.374855000 |
| C | -2.505124000 | 1.401788000  | -1.477526000 |
| C | -2.030260000 | 2.754232000  | -1.915835000 |
| C | -1.691649000 | 3.699288000  | -0.769509000 |
| H | 0.099771000  | 3.142143000  | 0.367936000  |
| H | -0.861529000 | 2.297216000  | 2.317305000  |
| H | -3.742850000 | 0.121907000  | -0.361330000 |
| H | -2.480072000 | 0.658528000  | -2.268092000 |
| H | -1.133734000 | 2.603915000  | -2.527937000 |
| H | -2.773171000 | 3.209346000  | -2.583654000 |
| H | -1.045275000 | 4.495449000  | -1.146879000 |
| H | -2.590258000 | 4.192571000  | -0.394823000 |
| H | -3.343446000 | 3.299138000  | 2.306694000  |
| H | -4.127744000 | 3.020763000  | 0.057064000  |
| H | -3.133845000 | 1.580042000  | -2.529066000 |
| H | -4.838173000 | 1.698901000  | 0.938372000  |
| N | -3.036713000 | -2.195694000 | -1.407286000 |
| C | -2.193658000 | -1.874292000 | -0.343748000 |
| C | -1.081097000 | -1.449070000 | -2.414287000 |
| C | -0.961698000 | -1.228954000 | -0.908941000 |
| C | -2.486661000 | -1.937682000 | -2.650531000 |
| O | -2.491498000 | -2.088362000 | 0.803812000  |
| O | -3.049935000 | -2.086134000 | -3.699850000 |
| C | -4.343236000 | -2.767962000 | -1.210154000 |
| H | -0.395261000 | -2.229412000 | -2.759599000 |
| H | -4.267015000 | -3.722437000 | -0.688030000 |
| H | -4.966091000 | -2.103463000 | -0.607895000 |
| H | -4.796326000 | -2.912949000 | -2.189391000 |
| H | -0.060615000 | -1.666652000 | -0.484583000 |
| N | 3.213039000  | -1.410170000 | -2.027502000 |
| C | 2.290609000  | -0.992920000 | -2.974390000 |
| C | 2.417300000  | 0.667434000  | -1.382394000 |
| C | 1.836103000  | 0.352662000  | -2.539083000 |
| C | 3.374938000  | -0.450223000 | -1.039833000 |
| O | 1.945465000  | -1.617068000 | -3.941827000 |
| O | 4.182898000  | -0.475421000 | -0.158122000 |
| C | 3.907441000  | -2.669563000 | -2.052628000 |
| H | -0.304008000 | 0.359563000  | -1.115686000 |
| H | 3.426506000  | -3.396060000 | -1.391793000 |
| H | 3.892530000  | -3.053103000 | -3.071637000 |
| H | 4.936523000  | -2.522198000 | -1.725175000 |
| H | 1.133024000  | 0.937563000  | -3.117948000 |

INT-8

E(RM06) = -1888.70535907

|   |              |              |              |
|---|--------------|--------------|--------------|
| C | -0.650201000 | 2.716001000  | -0.322345000 |
| C | -1.781627000 | 1.892252000  | -0.210192000 |
| C | -2.946932000 | 2.448536000  | 0.329810000  |
| C | -3.001537000 | 3.771821000  | 0.721693000  |
| C | -1.898669000 | 4.589309000  | 0.562796000  |
| C | -0.740054000 | 4.055909000  | 0.033199000  |
| C | 0.720017000  | 2.299708000  | -0.763826000 |
| O | 1.370222000  | 3.066254000  | -1.455662000 |
| N | 1.201058000  | 1.117658000  | -0.269434000 |
| C | 2.583429000  | 0.904210000  | -0.321670000 |
| C | 3.517415000  | 1.926486000  | -0.103883000 |
| C | 4.868679000  | 1.658147000  | -0.051789000 |
| C | 5.357788000  | 0.369234000  | -0.215814000 |
| C | 4.459555000  | -0.654704000 | -0.431954000 |
| C | 3.099468000  | -0.384413000 | -0.486926000 |
| S | 1.966367000  | -1.709328000 | -0.801494000 |

|    |              |              |              |
|----|--------------|--------------|--------------|
| C  | 1.884921000  | -1.576612000 | -2.607000000 |
| H  | -3.922142000 | 4.165378000  | 1.136988000  |
| H  | -1.936109000 | 5.633392000  | 0.850037000  |
| H  | 0.138534000  | 4.673009000  | -0.109065000 |
| H  | -3.826683000 | 1.830474000  | 0.429949000  |
| H  | 3.166000000  | 2.939745000  | 0.026733000  |
| H  | 5.557096000  | 2.475659000  | 0.130548000  |
| H  | 6.420749000  | 0.168233000  | -0.168902000 |
| H  | 4.797303000  | -1.677701000 | -0.561068000 |
| H  | 1.734223000  | -0.534598000 | -2.888419000 |
| H  | 2.828525000  | -1.937400000 | -3.016004000 |
| H  | 1.047280000  | -2.175909000 | -2.961933000 |
| Rh | 0.015020000  | -0.534406000 | 0.289622000  |
| C  | -0.091380000 | 0.157733000  | 2.390298000  |
| C  | 1.141474000  | -0.450959000 | 2.173065000  |
| C  | 1.536456000  | -1.826008000 | 2.626313000  |
| C  | 0.493382000  | -2.898452000 | 2.319214000  |
| C  | -0.366073000 | -2.606990000 | 1.112009000  |
| C  | -1.559985000 | -1.924522000 | 1.157151000  |
| C  | -2.176060000 | -1.268091000 | 2.357189000  |
| C  | -1.188654000 | -0.479394000 | 3.206143000  |
| H  | -0.128031000 | 1.239716000  | 2.289122000  |
| H  | 1.978552000  | 0.209528000  | 1.969567000  |
| H  | -0.217651000 | -3.254864000 | 0.252244000  |
| H  | -2.258454000 | -2.162016000 | 0.364293000  |
| H  | -2.960578000 | -0.597366000 | 1.998910000  |
| H  | -2.689770000 | -2.029422000 | 2.960037000  |
| H  | -1.728769000 | 0.300067000  | 3.747530000  |
| H  | -0.738295000 | -1.117050000 | 3.973485000  |
| H  | 1.770994000  | -1.822181000 | 3.698941000  |
| H  | -0.168336000 | -3.043503000 | 3.178465000  |
| H  | 2.473444000  | -2.081792000 | 2.122405000  |
| H  | 0.995773000  | -3.855649000 | 2.164592000  |
| N  | -2.913211000 | -1.267527000 | -1.707591000 |
| C  | -1.642066000 | -1.242020000 | -2.264742000 |
| C  | -1.783204000 | 0.502455000  | -0.685894000 |
| C  | -0.934494000 | -0.106715000 | -1.636064000 |
| C  | -3.060102000 | -0.305623000 | -0.720617000 |
| O  | -1.248733000 | -2.019503000 | -3.097870000 |
| O  | -4.060971000 | -0.216117000 | -0.055143000 |
| C  | -3.897686000 | -2.285738000 | -1.961097000 |
| H  | -3.528576000 | -2.909851000 | -2.773062000 |
| H  | -4.067431000 | -2.900733000 | -1.073389000 |
| H  | -4.847258000 | -1.831906000 | -2.245011000 |
| H  | -0.190410000 | 0.408915000  | -2.227910000 |

TS-6A

E(RM06) = -1888.67342913

|   |              |              |              |
|---|--------------|--------------|--------------|
| C | 1.635000000  | 2.272529000  | -0.387769000 |
| C | 2.281828000  | 1.192528000  | 0.196033000  |
| C | 3.665214000  | 1.152832000  | 0.241762000  |
| C | 4.389240000  | 2.210015000  | -0.288766000 |
| C | 3.740602000  | 3.293751000  | -0.861841000 |
| C | 2.357244000  | 3.327661000  | -0.912675000 |
| C | 0.154061000  | 2.221495000  | -0.404736000 |
| O | -0.529936000 | 3.171564000  | -0.720925000 |
| N | -0.325921000 | 0.976226000  | -0.032556000 |
| C | -1.556787000 | 0.895041000  | 0.628671000  |
| C | -1.946549000 | 1.910261000  | 1.513658000  |
| C | -3.121952000 | 1.835622000  | 2.226344000  |
| C | -3.957195000 | 0.737933000  | 2.086603000  |
| C | -3.593500000 | -0.277669000 | 1.226462000  |

|    |              |              |              |
|----|--------------|--------------|--------------|
| C  | -2.401245000 | -0.220721000 | 0.514041000  |
| S  | -1.986774000 | -1.565790000 | -0.571477000 |
| C  | -2.183096000 | -2.996078000 | 0.520510000  |
| H  | 5.472014000  | 2.187771000  | -0.251409000 |
| H  | 4.319559000  | 4.112771000  | -1.271648000 |
| H  | 1.818907000  | 4.157522000  | -1.356468000 |
| H  | 4.171781000  | 0.307275000  | 0.694252000  |
| H  | -1.298672000 | 2.766818000  | 1.637661000  |
| H  | -3.385712000 | 2.640827000  | 2.901541000  |
| H  | -4.886694000 | 0.674983000  | 2.639366000  |
| H  | -4.245144000 | -1.134361000 | 1.096541000  |
| H  | -1.737313000 | -2.817680000 | 1.495787000  |
| H  | -3.238994000 | -3.243654000 | 0.621508000  |
| H  | -1.657795000 | -3.823539000 | 0.045138000  |
| Rh | 0.314681000  | -0.666251000 | -1.479314000 |
| C  | -0.050945000 | 0.675117000  | -3.204060000 |
| C  | -0.995259000 | -0.339032000 | -3.201894000 |
| C  | -0.960621000 | -1.582995000 | -4.041361000 |
| C  | 0.416473000  | -2.244050000 | -4.089802000 |
| C  | 1.198798000  | -2.046871000 | -2.807244000 |
| C  | 2.086024000  | -0.964798000 | -2.595932000 |
| C  | 2.377352000  | 0.162046000  | -3.545381000 |
| C  | 1.115098000  | 0.747826000  | -4.157698000 |
| H  | -0.358040000 | 1.618977000  | -2.760523000 |
| H  | -1.973572000 | -0.087900000 | -2.796047000 |
| H  | 1.421206000  | -2.960028000 | -2.256946000 |
| H  | 2.919416000  | -1.151159000 | -1.919862000 |
| H  | 2.893525000  | 0.941239000  | -2.973803000 |
| H  | 3.083788000  | -0.159293000 | -4.323842000 |
| H  | 1.285137000  | 1.792448000  | -4.429071000 |
| H  | 0.857592000  | 0.233542000  | -5.087767000 |
| H  | -1.328403000 | -1.370235000 | -5.054214000 |
| H  | 0.997516000  | -1.863653000 | -4.935765000 |
| H  | -1.677895000 | -2.285443000 | -3.605126000 |
| H  | 0.292515000  | -3.312616000 | -4.278349000 |
| N  | 0.400493000  | -1.085799000 | 2.373435000  |
| C  | 0.848137000  | -2.013580000 | 1.412377000  |
| C  | 1.426438000  | 0.121152000  | 0.714679000  |
| C  | 1.491829000  | -1.236007000 | 0.341138000  |
| C  | 0.813347000  | 0.195248000  | 2.089975000  |
| O  | 0.719579000  | -3.204197000 | 1.522876000  |
| O  | 0.710103000  | 1.152691000  | 2.806312000  |
| C  | -0.337202000 | -1.421401000 | 3.562756000  |
| H  | -0.396612000 | -2.507161000 | 3.628407000  |
| H  | 0.167016000  | -1.026809000 | 4.445379000  |
| H  | -1.343455000 | -0.994399000 | 3.518379000  |
| H  | 2.353902000  | -1.668292000 | -0.148596000 |

INT-9C

E(RM06) = -2235.65769756

|   |              |              |             |
|---|--------------|--------------|-------------|
| C | 0.340678000  | 1.682231000  | 1.793454000 |
| C | 1.647899000  | 1.919113000  | 1.348453000 |
| C | 2.030960000  | 3.235484000  | 1.069642000 |
| C | 1.179646000  | 4.296018000  | 1.302423000 |
| C | -0.084477000 | 4.062250000  | 1.818556000 |
| C | -0.494706000 | 2.764078000  | 2.046525000 |
| C | -0.243482000 | 0.335170000  | 2.143408000 |
| O | 0.058886000  | -0.179448000 | 3.207295000 |
| N | -1.135190000 | -0.162240000 | 1.235332000 |
| C | -2.185328000 | -0.972830000 | 1.703782000 |
| C | -2.769878000 | -0.713866000 | 2.951258000 |
| C | -3.858463000 | -1.421247000 | 3.407691000 |

|    |              |              |              |
|----|--------------|--------------|--------------|
| C  | -4.427797000 | -2.413402000 | 2.623360000  |
| C  | -3.886625000 | -2.668726000 | 1.382743000  |
| C  | -2.766893000 | -1.981680000 | 0.919334000  |
| S  | -2.174116000 | -2.377003000 | -0.717222000 |
| C  | -1.756609000 | -4.124952000 | -0.476549000 |
| H  | 1.511457000  | 5.307213000  | 1.099265000  |
| H  | -0.751919000 | 4.888502000  | 2.035191000  |
| H  | -1.488629000 | 2.569547000  | 2.437916000  |
| H  | 3.025522000  | 3.419464000  | 0.685760000  |
| H  | -2.338862000 | 0.059546000  | 3.574445000  |
| H  | -4.275565000 | -1.186344000 | 4.380193000  |
| H  | -5.294516000 | -2.965147000 | 2.966303000  |
| H  | -4.342506000 | -3.412328000 | 0.737758000  |
| H  | -0.919658000 | -4.229195000 | 0.215453000  |
| H  | -2.613959000 | -4.689503000 | -0.112415000 |
| H  | -1.473287000 | -4.515477000 | -1.454258000 |
| Rh | -1.039014000 | 0.634261000  | -0.755425000 |
| C  | -2.551274000 | 2.090673000  | -0.442954000 |
| C  | -3.117724000 | 0.921402000  | -0.963654000 |
| C  | -3.527140000 | 0.691629000  | -2.390915000 |
| C  | -2.494756000 | 1.191774000  | -3.398557000 |
| C  | -1.088315000 | 1.031452000  | -2.876448000 |
| C  | -0.386101000 | 2.032875000  | -2.212608000 |
| C  | -0.909711000 | 3.393320000  | -1.851112000 |
| C  | -2.307592000 | 3.356153000  | -1.233956000 |
| H  | -2.651604000 | 2.221944000  | 0.630862000  |
| H  | -3.612463000 | 0.266274000  | -0.247720000 |
| H  | -0.499465000 | 0.228648000  | -3.317196000 |
| H  | 0.700035000  | 1.939980000  | -2.184301000 |
| H  | -0.215078000 | 3.821039000  | -1.121720000 |
| H  | -0.886591000 | 4.060697000  | -2.723028000 |
| H  | -2.428530000 | 4.218279000  | -0.573337000 |
| H  | -3.078414000 | 3.460502000  | -2.003210000 |
| H  | -4.509136000 | 1.146664000  | -2.578908000 |
| H  | -2.676398000 | 2.239335000  | -3.653414000 |
| H  | -3.663580000 | -0.386098000 | -2.520576000 |
| H  | -2.601831000 | 0.636731000  | -4.333117000 |
| N  | 4.559991000  | -0.193649000 | 0.464337000  |
| C  | 4.078245000  | -0.907162000 | 1.563625000  |
| C  | 2.651681000  | 0.868909000  | 1.238035000  |
| C  | 2.852280000  | -0.207941000 | 2.006163000  |
| C  | 3.758161000  | 0.905963000  | 0.208594000  |
| O  | 4.604917000  | -1.883445000 | 2.022083000  |
| O  | 3.932447000  | 1.699036000  | -0.676453000 |
| C  | 5.789273000  | -0.497437000 | -0.218407000 |
| H  | 5.744792000  | -1.484914000 | -0.682742000 |
| H  | 5.940581000  | 0.257149000  | -0.989307000 |
| H  | 6.629390000  | -0.484247000 | 0.477855000  |
| H  | 2.261975000  | -0.535722000 | 2.849897000  |
| H  | 0.193236000  | -1.546514000 | 0.723010000  |
| C  | 1.265346000  | -1.501101000 | -0.810163000 |
| O  | 0.882590000  | -0.384184000 | -1.130028000 |
| O  | 0.886913000  | -2.102265000 | 0.287925000  |
| C  | 2.155750000  | -2.318169000 | -1.717975000 |
| C  | 1.189655000  | -3.116438000 | -2.601222000 |
| H  | 0.602937000  | -3.819183000 | -2.006431000 |
| H  | 0.504987000  | -2.455629000 | -3.139710000 |
| H  | 1.765932000  | -3.686435000 | -3.333964000 |
| C  | 3.040389000  | -3.281714000 | -0.941802000 |
| H  | 2.450235000  | -3.984526000 | -0.352620000 |
| H  | 3.648006000  | -3.854564000 | -1.646782000 |
| H  | 3.716033000  | -2.764634000 | -0.257733000 |

|   |             |              |              |
|---|-------------|--------------|--------------|
| C | 2.987326000 | -1.395181000 | -2.595235000 |
| H | 3.602600000 | -1.996598000 | -3.268578000 |
| H | 2.354679000 | -0.740401000 | -3.196894000 |
| H | 3.648917000 | -0.759954000 | -2.003464000 |

INT-9A

E(RM06) = -1888.71519443

|    |              |              |              |
|----|--------------|--------------|--------------|
| C  | 1.665028000  | 2.420558000  | -0.435488000 |
| C  | 2.131920000  | 1.259394000  | 0.148923000  |
| C  | 3.487934000  | 1.004793000  | 0.214855000  |
| C  | 4.355561000  | 1.934766000  | -0.336807000 |
| C  | 3.879267000  | 3.094433000  | -0.941308000 |
| C  | 2.520822000  | 3.352724000  | -0.990841000 |
| C  | 0.194812000  | 2.473602000  | -0.315717000 |
| O  | -0.558272000 | 3.356260000  | -0.640467000 |
| N  | -0.171432000 | 1.273709000  | 0.275374000  |
| C  | -1.435687000 | 1.097556000  | 0.887566000  |
| C  | -1.728424000 | 1.850724000  | 2.020419000  |
| C  | -2.914173000 | 1.678511000  | 2.704447000  |
| C  | -3.830685000 | 0.740657000  | 2.259318000  |
| C  | -3.567124000 | 0.006777000  | 1.120310000  |
| C  | -2.376305000 | 0.178322000  | 0.422758000  |
| S  | -2.169368000 | -0.644208000 | -1.142612000 |
| C  | -2.720447000 | -2.325204000 | -0.741565000 |
| H  | 5.424163000  | 1.758766000  | -0.293381000 |
| H  | 4.582090000  | 3.802204000  | -1.364566000 |
| H  | 2.122566000  | 4.255393000  | -1.440131000 |
| H  | 3.867688000  | 0.103886000  | 0.686371000  |
| H  | -0.987355000 | 2.563466000  | 2.362525000  |
| H  | -3.120143000 | 2.272555000  | 3.586356000  |
| H  | -4.764501000 | 0.591719000  | 2.788253000  |
| H  | -4.309797000 | -0.691544000 | 0.754262000  |
| H  | -2.136279000 | -2.722748000 | 0.087988000  |
| H  | -3.787939000 | -2.336525000 | -0.527646000 |
| H  | -2.527711000 | -2.922009000 | -1.632347000 |
| Rh | 0.055164000  | -1.040540000 | -1.935665000 |
| C  | -0.468989000 | -0.408534000 | -4.006054000 |
| C  | -0.899964000 | -1.706034000 | -3.811173000 |
| C  | -0.192303000 | -2.963005000 | -4.225423000 |
| C  | 1.319513000  | -2.918477000 | -4.005705000 |
| C  | 1.710656000  | -2.151675000 | -2.764536000 |
| C  | 2.043215000  | -0.802067000 | -2.740449000 |
| C  | 1.987391000  | 0.163557000  | -3.885635000 |
| C  | 0.762712000  | -0.014976000 | -4.780841000 |
| H  | -1.206060000 | 0.378415000  | -3.861999000 |
| H  | -1.960587000 | -1.839068000 | -3.599550000 |
| H  | 2.068892000  | -2.760823000 | -1.936867000 |
| H  | 2.668015000  | -0.459542000 | -1.918958000 |
| H  | 1.972036000  | 1.169711000  | -3.452393000 |
| H  | 2.908966000  | 0.107703000  | -4.481378000 |
| H  | 0.567424000  | 0.921549000  | -5.308082000 |
| H  | 0.960203000  | -0.756591000 | -5.559012000 |
| H  | -0.416726000 | -3.211439000 | -5.271821000 |
| H  | 1.821093000  | -2.486842000 | -4.875682000 |
| H  | -0.608742000 | -3.780843000 | -3.627577000 |
| H  | 1.695352000  | -3.941000000 | -3.925328000 |
| N  | 0.407570000  | -1.084216000 | 2.297262000  |
| C  | 0.342443000  | -1.820786000 | 1.098121000  |
| C  | 0.991047000  | 0.415022000  | 0.612584000  |
| C  | 0.917156000  | -0.984756000 | 0.008077000  |
| C  | 0.922627000  | 0.175933000  | 2.127910000  |
| O  | -0.076834000 | -2.949907000 | 1.058137000  |

|   |              |              |              |
|---|--------------|--------------|--------------|
| O | 1.176778000  | 0.956220000  | 3.004848000  |
| C | -0.036533000 | -1.572613000 | 3.576690000  |
| H | -0.415462000 | -2.583382000 | 3.435851000  |
| H | 0.785968000  | -1.581358000 | 4.293083000  |
| H | -0.827145000 | -0.927273000 | 3.967394000  |
| H | 1.939964000  | -1.364388000 | -0.116918000 |

TS-6C

E(RM06) = -2235.64535329

|    |              |              |              |
|----|--------------|--------------|--------------|
| C  | -0.444964000 | 1.702914000  | 1.904313000  |
| C  | 0.541638000  | 2.467946000  | 1.271207000  |
| C  | 0.304772000  | 3.831282000  | 1.083803000  |
| C  | -0.852162000 | 4.429617000  | 1.542424000  |
| C  | -1.805143000 | 3.671592000  | 2.198853000  |
| C  | -1.597955000 | 2.315754000  | 2.374047000  |
| C  | -0.307710000 | 0.232199000  | 2.161472000  |
| O  | 0.308176000  | -0.178484000 | 3.103204000  |
| N  | -0.941411000 | -0.657222000 | 1.229282000  |
| C  | -1.975505000 | -1.466603000 | 1.770600000  |
| C  | -2.576414000 | -1.161020000 | 2.992600000  |
| C  | -3.614631000 | -1.917275000 | 3.499263000  |
| C  | -4.094143000 | -3.007898000 | 2.797420000  |
| C  | -3.513580000 | -3.321354000 | 1.584637000  |
| C  | -2.459491000 | -2.579273000 | 1.065131000  |
| S  | -1.805167000 | -3.070409000 | -0.516992000 |
| C  | -0.833549000 | -4.503528000 | 0.024227000  |
| H  | -1.003618000 | 5.492037000  | 1.394426000  |
| H  | -2.711591000 | 4.131736000  | 2.574097000  |
| H  | -2.353849000 | 1.718832000  | 2.873240000  |
| H  | 1.050747000  | 4.425780000  | 0.573166000  |
| H  | -2.204546000 | -0.332487000 | 3.582743000  |
| H  | -4.049042000 | -1.646012000 | 4.454377000  |
| H  | -4.912570000 | -3.602441000 | 3.183943000  |
| H  | -3.878732000 | -4.161685000 | 1.003683000  |
| H  | 0.020715000  | -4.176563000 | 0.618603000  |
| H  | -1.459429000 | -5.191161000 | 0.592641000  |
| H  | -0.481824000 | -5.007912000 | -0.875945000 |
| Rh | -1.135041000 | 0.147263000  | -0.855010000 |
| C  | -2.902258000 | 1.306602000  | -0.532669000 |
| C  | -3.245630000 | 0.042688000  | -1.016489000 |
| C  | -3.621725000 | -0.304247000 | -2.429098000 |
| C  | -2.722797000 | 0.366148000  | -3.463206000 |
| C  | -1.304724000 | 0.484620000  | -2.962116000 |
| C  | -0.792344000 | 1.621864000  | -2.337914000 |
| C  | -1.562045000 | 2.866159000  | -2.004103000 |
| C  | -2.912016000 | 2.581341000  | -1.345621000 |
| H  | -3.005283000 | 1.443673000  | 0.540248000  |
| H  | -3.595694000 | -0.675659000 | -0.275828000 |
| H  | -0.580300000 | -0.202567000 | -3.395379000 |
| H  | 0.289203000  | 1.746402000  | -2.343862000 |
| H  | -0.943664000 | 3.451150000  | -1.316760000 |
| H  | -1.689453000 | 3.488602000  | -2.899894000 |
| H  | -3.169904000 | 3.416080000  | -0.688021000 |
| H  | -3.709117000 | 2.531055000  | -2.093611000 |
| H  | -4.677683000 | -0.062856000 | -2.611516000 |
| H  | -3.105842000 | 1.355918000  | -3.726036000 |
| H  | -3.538086000 | -1.390733000 | -2.531062000 |
| H  | -2.735547000 | -0.213815000 | -4.388590000 |
| N  | 3.713581000  | 1.764700000  | -0.491991000 |
| C  | 3.844366000  | 0.862499000  | 0.563018000  |
| C  | 1.813522000  | 1.913088000  | 0.823521000  |
| C  | 2.612005000  | 0.996308000  | 1.376226000  |

|   |              |              |              |
|---|--------------|--------------|--------------|
| C | 2.498537000  | 2.410168000  | -0.428389000 |
| O | 4.787721000  | 0.143304000  | 0.745757000  |
| O | 2.095382000  | 3.205038000  | -1.235575000 |
| C | 4.682371000  | 1.980992000  | -1.532832000 |
| H | 5.539625000  | 1.340458000  | -1.330542000 |
| H | 4.262995000  | 1.732347000  | -2.509167000 |
| H | 5.002176000  | 3.024045000  | -1.547725000 |
| H | 2.464730000  | 0.429652000  | 2.283389000  |
| H | -0.009368000 | -1.326757000 | 0.886346000  |
| C | 1.419824000  | -1.446633000 | -0.671724000 |
| O | 0.874929000  | -0.446114000 | -1.209120000 |
| O | 1.096108000  | -1.913975000 | 0.448156000  |
| C | 2.477878000  | -2.185614000 | -1.486058000 |
| C | 1.685172000  | -3.075647000 | -2.446519000 |
| H | 1.046839000  | -3.773306000 | -1.899812000 |
| H | 1.054920000  | -2.476940000 | -3.109290000 |
| H | 2.377117000  | -3.658435000 | -3.060390000 |
| C | 3.360559000  | -3.043839000 | -0.595680000 |
| H | 2.776706000  | -3.786227000 | -0.049637000 |
| H | 4.097780000  | -3.568072000 | -1.210230000 |
| H | 3.898710000  | -2.433284000 | 0.133222000  |
| C | 3.333161000  | -1.224229000 | -2.296144000 |
| H | 3.952569000  | -1.790287000 | -2.997173000 |
| H | 2.717621000  | -0.523352000 | -2.864049000 |
| H | 4.007069000  | -0.660497000 | -1.648690000 |

INT-10A

E(RM06) = -2235.67273226

|    |              |              |              |
|----|--------------|--------------|--------------|
| C  | -0.926927000 | 0.757574000  | 2.481983000  |
| C  | -0.371307000 | -0.364499000 | 1.908630000  |
| C  | 0.678965000  | -1.018309000 | 2.523941000  |
| C  | 1.193700000  | -0.474054000 | 3.690383000  |
| C  | 0.654006000  | 0.683829000  | 4.244424000  |
| C  | -0.428739000 | 1.305756000  | 3.649133000  |
| C  | -2.028319000 | 1.237565000  | 1.632824000  |
| O  | -2.702812000 | 2.230577000  | 1.771886000  |
| N  | -2.132753000 | 0.330527000  | 0.589436000  |
| C  | -2.818246000 | 0.685811000  | -0.600747000 |
| C  | -2.346203000 | 1.781204000  | -1.316033000 |
| C  | -2.888908000 | 2.140439000  | -2.530927000 |
| C  | -3.935661000 | 1.394587000  | -3.049562000 |
| C  | -4.449417000 | 0.338092000  | -2.326408000 |
| C  | -3.917186000 | -0.022863000 | -1.088558000 |
| S  | -4.683062000 | -1.378230000 | -0.254293000 |
| C  | -4.881113000 | -0.747177000 | 1.433100000  |
| H  | 2.025395000  | -0.963681000 | 4.185360000  |
| H  | 1.076160000  | 1.084955000  | 5.158257000  |
| H  | -0.883265000 | 2.196826000  | 4.068054000  |
| H  | 1.082567000  | -1.937708000 | 2.112861000  |
| H  | -1.519882000 | 2.344243000  | -0.893718000 |
| H  | -2.491968000 | 2.990308000  | -3.073891000 |
| H  | -4.371773000 | 1.653488000  | -4.007080000 |
| H  | -5.302001000 | -0.217091000 | -2.700837000 |
| H  | -4.020869000 | -0.995317000 | 2.052917000  |
| H  | -5.042217000 | 0.329872000  | 1.406908000  |
| H  | -5.770187000 | -1.233262000 | 1.833420000  |
| Rh | 1.849273000  | -0.484854000 | -0.294517000 |
| C  | 2.593247000  | -1.927694000 | -1.676537000 |
| C  | 2.363474000  | -2.531617000 | -0.434667000 |
| C  | 3.419270000  | -2.875585000 | 0.580055000  |
| C  | 4.434370000  | -1.755221000 | 0.820185000  |
| C  | 3.843443000  | -0.380377000 | 0.636003000  |

|   |              |              |              |
|---|--------------|--------------|--------------|
| C | 3.868863000  | 0.325736000  | -0.552784000 |
| C | 4.405758000  | -0.167843000 | -1.866325000 |
| C | 3.973409000  | -1.595406000 | -2.198557000 |
| H | 1.813065000  | -2.054748000 | -2.423074000 |
| H | 1.454871000  | -3.124408000 | -0.338398000 |
| H | 3.660257000  | 0.193061000  | 1.543238000  |
| H | 3.762884000  | 1.407734000  | -0.481309000 |
| H | 4.037909000  | 0.505914000  | -2.647180000 |
| H | 5.500497000  | -0.082498000 | -1.894859000 |
| H | 3.986184000  | -1.730585000 | -3.282238000 |
| H | 4.695850000  | -2.314940000 | -1.802956000 |
| H | 3.934510000  | -3.801855000 | 0.291674000  |
| H | 5.295603000  | -1.872089000 | 0.156753000  |
| H | 2.913966000  | -3.105951000 | 1.523031000  |
| H | 4.830594000  | -1.841889000 | 1.834652000  |
| N | -1.397003000 | -2.832523000 | -0.345090000 |
| C | -0.644086000 | -2.090231000 | -1.275198000 |
| C | -1.083598000 | -0.716029000 | 0.631449000  |
| C | -0.250486000 | -0.820968000 | -0.645955000 |
| C | -1.688176000 | -2.129675000 | 0.788876000  |
| O | -0.385333000 | -2.509095000 | -2.377540000 |
| O | -2.264284000 | -2.553132000 | 1.755391000  |
| C | -1.893553000 | -4.161721000 | -0.583892000 |
| H | -1.530215000 | -4.483647000 | -1.558413000 |
| H | -1.545645000 | -4.844820000 | 0.192587000  |
| H | -2.985595000 | -4.158882000 | -0.576581000 |
| H | -0.454167000 | -0.008221000 | -1.347127000 |
| H | 1.513511000  | 1.222144000  | -1.958211000 |
| C | 1.196141000  | 2.443033000  | -0.580810000 |
| O | 1.270325000  | 1.565398000  | 0.265094000  |
| O | 1.340102000  | 2.190089000  | -1.866261000 |
| C | 1.041853000  | 3.902750000  | -0.230658000 |
| C | 0.312531000  | 4.047870000  | 1.096281000  |
| H | -0.721119000 | 3.695107000  | 1.039424000  |
| H | 0.814256000  | 3.490488000  | 1.888928000  |
| H | 0.289640000  | 5.103482000  | 1.376228000  |
| C | 0.324833000  | 4.681094000  | -1.324617000 |
| H | -0.693256000 | 4.315217000  | -1.478508000 |
| H | 0.256630000  | 5.729401000  | -1.025410000 |
| H | 0.855354000  | 4.630658000  | -2.275857000 |
| C | 2.479401000  | 4.419668000  | -0.089453000 |
| H | 2.452946000  | 5.479014000  | 0.175672000  |
| H | 3.012182000  | 3.883220000  | 0.699798000  |
| H | 3.035332000  | 4.315399000  | -1.024602000 |

INT-10C

E(RM06) = -1466.74919253

|   |              |              |              |
|---|--------------|--------------|--------------|
| C | -1.557326000 | -1.945691000 | 0.195662000  |
| C | -2.241100000 | -0.731380000 | 0.044513000  |
| C | -3.529941000 | -0.751380000 | -0.489965000 |
| C | -4.136684000 | -1.944473000 | -0.829133000 |
| C | -3.470213000 | -3.142313000 | -0.635234000 |
| C | -2.186077000 | -3.138361000 | -0.122663000 |
| C | -0.138465000 | -2.026295000 | 0.673899000  |
| O | 0.165364000  | -2.647814000 | 1.666649000  |
| N | 0.734038000  | -1.365459000 | -0.143671000 |
| C | 2.092733000  | -1.108967000 | 0.029821000  |
| C | 2.834123000  | -1.637190000 | 1.084101000  |
| C | 4.177718000  | -1.334616000 | 1.202399000  |
| C | 4.810718000  | -0.517387000 | 0.282261000  |
| C | 4.080734000  | 0.002904000  | -0.770030000 |
| C | 2.729460000  | -0.275412000 | -0.905923000 |

|   |              |              |              |
|---|--------------|--------------|--------------|
| S | 1.823746000  | 0.430945000  | -2.266628000 |
| C | 1.453919000  | 2.053031000  | -1.544877000 |
| H | -5.139824000 | -1.938685000 | -1.238109000 |
| H | -3.947434000 | -4.080677000 | -0.891294000 |
| H | -1.646562000 | -4.066644000 | 0.027367000  |
| H | -4.058377000 | 0.183934000  | -0.623116000 |
| H | 2.342668000  | -2.281219000 | 1.798255000  |
| H | 4.737995000  | -1.753452000 | 2.030230000  |
| H | 5.865308000  | -0.290468000 | 0.378676000  |
| H | 4.553815000  | 0.639540000  | -1.509843000 |
| H | 0.943370000  | 1.938041000  | -0.587358000 |
| H | 2.370661000  | 2.624715000  | -1.401106000 |
| H | 0.801075000  | 2.575220000  | -2.244982000 |
| N | -1.304029000 | 2.813724000  | 0.575257000  |
| C | -0.665715000 | 2.241040000  | 1.677742000  |
| C | -1.687793000 | 0.531620000  | 0.518089000  |
| C | -0.945163000 | 0.787599000  | 1.598918000  |
| C | -1.922831000 | 1.845814000  | -0.189123000 |
| O | -0.026815000 | 2.840737000  | 2.495099000  |
| O | -2.498889000 | 2.040888000  | -1.224488000 |
| C | -1.237428000 | 4.205321000  | 0.217970000  |
| H | -0.749486000 | 4.735867000  | 1.034047000  |
| H | -0.662235000 | 4.345571000  | -0.700168000 |
| H | -2.238628000 | 4.608036000  | 0.062692000  |
| H | -0.588643000 | 0.097884000  | 2.352055000  |
| H | 0.345014000  | -0.924327000 | -0.971042000 |

**INT-10D**

E(RM06) = -2235.64934858

|    |              |              |              |
|----|--------------|--------------|--------------|
| C  | -0.430645000 | 1.618822000  | 2.063310000  |
| C  | 0.320718000  | 2.447377000  | 1.218246000  |
| C  | 0.010876000  | 3.807916000  | 1.181125000  |
| C  | -0.979408000 | 4.342095000  | 1.982997000  |
| C  | -1.663596000 | 3.529389000  | 2.866713000  |
| C  | -1.381430000 | 2.175132000  | 2.905927000  |
| C  | -0.269332000 | 0.131657000  | 2.119565000  |
| O  | 0.316564000  | -0.421264000 | 2.997593000  |
| N  | -0.917444000 | -0.644377000 | 1.056914000  |
| C  | -1.994865000 | -1.470317000 | 1.516680000  |
| C  | -2.675413000 | -1.174508000 | 2.692285000  |
| C  | -3.777291000 | -1.908458000 | 3.091514000  |
| C  | -4.224554000 | -2.968144000 | 2.327048000  |
| C  | -3.547194000 | -3.280269000 | 1.163483000  |
| C  | -2.439162000 | -2.554238000 | 0.746884000  |
| S  | -1.676608000 | -3.014870000 | -0.790872000 |
| C  | -0.570183000 | -4.307638000 | -0.156570000 |
| H  | -1.195198000 | 5.402681000  | 1.934934000  |
| H  | -2.418327000 | 3.941785000  | 3.525274000  |
| H  | -1.923455000 | 1.540701000  | 3.596659000  |
| H  | 0.575208000  | 4.450897000  | 0.518974000  |
| H  | -2.337064000 | -0.367726000 | 3.327460000  |
| H  | -4.282662000 | -1.644477000 | 4.012913000  |
| H  | -5.088410000 | -3.546340000 | 2.630580000  |
| H  | -3.875449000 | -4.104672000 | 0.539920000  |
| H  | 0.210573000  | -3.866402000 | 0.463466000  |
| H  | -1.142733000 | -5.051235000 | 0.397890000  |
| H  | -0.108645000 | -4.783263000 | -1.022214000 |
| Rh | -1.322867000 | 0.360247000  | -0.946953000 |
| C  | -2.935942000 | 1.632988000  | -0.328168000 |
| C  | -3.432326000 | 0.380817000  | -0.694479000 |
| C  | -4.078785000 | 0.016161000  | -2.001182000 |
| C  | -3.361804000 | 0.612254000  | -3.208833000 |

|   |              |              |              |
|---|--------------|--------------|--------------|
| C | -1.871199000 | 0.676682000  | -2.986724000 |
| C | -1.198500000 | 1.799102000  | -2.504926000 |
| C | -1.830045000 | 3.088372000  | -2.069470000 |
| C | -3.049298000 | 2.882209000  | -1.173142000 |
| H | -2.814892000 | 1.806131000  | 0.739542000  |
| H | -3.683064000 | -0.297779000 | 0.118784000  |
| H | -1.271536000 | -0.058996000 | -3.519246000 |
| H | -0.133207000 | 1.861396000  | -2.720225000 |
| H | -1.066010000 | 3.648876000  | -1.523556000 |
| H | -2.087974000 | 3.701025000  | -2.943686000 |
| H | -3.161561000 | 3.747085000  | -0.514284000 |
| H | -3.967792000 | 2.838347000  | -1.765705000 |
| H | -5.140524000 | 0.297812000  | -1.997442000 |
| H | -3.745649000 | 1.611037000  | -3.433041000 |
| H | -4.057159000 | -1.076469000 | -2.077084000 |
| H | -3.570832000 | 0.005795000  | -4.092733000 |
| N | 3.125031000  | 1.970624000  | -1.150494000 |
| C | 3.429127000  | 0.965870000  | -0.233184000 |
| C | 1.478173000  | 1.964623000  | 0.474871000  |
| C | 2.354233000  | 1.006428000  | 0.788498000  |
| C | 1.956865000  | 2.608705000  | -0.804093000 |
| O | 4.388285000  | 0.247870000  | -0.283837000 |
| O | 1.457232000  | 3.510924000  | -1.424364000 |
| C | 3.907162000  | 2.314919000  | -2.307452000 |
| H | 4.820535000  | 1.722437000  | -2.283861000 |
| H | 3.358397000  | 2.097947000  | -3.225917000 |
| H | 4.157905000  | 3.376442000  | -2.292759000 |
| H | 2.370929000  | 0.345899000  | 1.642363000  |
| H | -0.132017000 | -1.227164000 | 0.657763000  |
| C | 1.259840000  | -1.251777000 | -1.292367000 |
| O | 0.540741000  | -0.277453000 | -1.689990000 |
| O | 1.283543000  | -1.696401000 | -0.138026000 |
| C | 2.101086000  | -1.923569000 | -2.387286000 |
| C | 1.125446000  | -2.727196000 | -3.246783000 |
| H | 0.613994000  | -3.492730000 | -2.657638000 |
| H | 0.367828000  | -2.080522000 | -3.695759000 |
| H | 1.670373000  | -3.231828000 | -4.049739000 |
| C | 3.136797000  | -2.853928000 | -1.780213000 |
| H | 2.666693000  | -3.630660000 | -1.174433000 |
| H | 3.710314000  | -3.336501000 | -2.577295000 |
| H | 3.831408000  | -2.305549000 | -1.140075000 |
| C | 2.790994000  | -0.889340000 | -3.265037000 |
| H | 3.283490000  | -1.389394000 | -4.104173000 |
| H | 2.075607000  | -0.166842000 | -3.665011000 |
| H | 3.561144000  | -0.354697000 | -2.704600000 |

**TS-7A**

E(RM06) = -2235.63611024

|   |              |              |              |
|---|--------------|--------------|--------------|
| C | -0.774051000 | 1.412850000  | 2.102152000  |
| C | -0.401926000 | 0.135261000  | 1.747391000  |
| C | 0.416205000  | -0.611581000 | 2.572438000  |
| C | 0.904068000  | -0.014268000 | 3.723557000  |
| C | 0.558696000  | 1.291579000  | 4.057706000  |
| C | -0.300026000 | 2.017988000  | 3.251908000  |
| C | -1.722257000 | 1.937192000  | 1.103069000  |
| O | -2.231570000 | 3.028663000  | 1.057804000  |
| N | -1.929850000 | 0.905729000  | 0.195860000  |
| C | -2.513126000 | 1.176357000  | -1.072864000 |
| C | -1.849313000 | 2.060948000  | -1.917495000 |
| C | -2.320428000 | 2.322723000  | -3.188070000 |
| C | -3.474013000 | 1.697070000  | -3.630345000 |
| C | -4.162994000 | 0.850118000  | -2.786284000 |

C -3.707773000 0.588140000 -1.495383000  
S -4.690002000 -0.506122000 -0.515702000  
C -4.837544000 0.386941000 1.054559000  
H 1.556846000 -0.577017000 4.381356000  
H 0.951824000 1.731495000 4.966640000  
H -0.611036000 3.026236000 3.502885000  
H 0.666414000 -1.641789000 2.335371000  
H -0.931633000 2.516837000 -1.561559000  
H -1.782818000 3.006987000 -3.833000000  
H -3.853372000 1.887582000 -4.627436000  
H -5.092397000 0.393528000 -3.107087000  
H -4.045693000 0.105804000 1.747309000  
H -4.825858000 1.460216000 0.868617000  
H -5.803283000 0.105849000 1.473222000  
Rh 2.227558000 -1.194234000 0.098680000  
C 2.480114000 -3.027086000 -1.013515000  
C 1.861693000 -3.301742000 0.203605000  
C 2.537206000 -3.861194000 1.426219000  
C 3.870346000 -3.184155000 1.742873000  
C 3.880479000 -1.735270000 1.321274000  
C 4.342902000 -1.280730000 0.081141000  
C 4.829345000 -2.134064000 -1.051014000  
C 3.928425000 -3.337514000 -1.307057000  
H 1.827063000 -2.919374000 -1.874756000  
H 0.784535000 -3.458090000 0.189025000  
H 3.849489000 -0.999776000 2.123101000  
H 4.649554000 -0.237672000 0.033489000  
H 4.852670000 -1.506632000 -1.945912000  
H 5.866735000 -2.448691000 -0.874847000  
H 4.021609000 -3.646005000 -2.350257000  
H 4.249998000 -4.197127000 -0.713117000  
H 2.668149000 -4.946582000 1.324460000  
H 4.696761000 -3.712458000 1.260228000  
H 1.858036000 -3.726137000 2.273559000  
H 4.063548000 -3.248075000 2.815771000  
N -1.566536000 -2.459761000 -0.238607000  
C -0.612170000 -2.001125000 -1.153115000  
C -1.071900000 -0.265239000 0.460851000  
C -0.174549000 -0.644243000 -0.727228000  
C -1.875029000 -1.553148000 0.741998000  
O -0.292603000 -2.623353000 -2.131815000  
O -2.583024000 -1.762969000 1.687618000  
C -2.201255000 -3.750479000 -0.322582000  
H -1.780452000 -4.276565000 -1.177741000  
H -2.025937000 -4.317708000 0.593106000  
H -3.278041000 -3.628584000 -0.452067000  
H -0.472124000 -0.039257000 -1.596723000  
H 0.855829000 0.209896000 -0.804257000  
C 2.069752000 1.709582000 0.066288000  
O 2.586261000 0.782781000 0.738518000  
O 1.261392000 1.493397000 -0.871608000  
C 2.487836000 3.142075000 0.353601000  
C 3.126455000 3.262705000 1.727122000  
H 2.431665000 2.960249000 2.513991000  
H 4.018368000 2.640019000 1.810445000  
H 3.414117000 4.302433000 1.903710000  
C 1.288421000 4.073726000 0.248517000  
H 0.517417000 3.826212000 0.983662000  
H 1.609394000 5.102210000 0.433074000  
H 0.835022000 4.031645000 -0.742648000  
C 3.515061000 3.498780000 -0.722393000  
H 3.869437000 4.520749000 -0.564507000

H 4.379606000 2.829844000 -0.677027000  
H 3.077957000 3.434963000 -1.720838000

#### TS-7C

E(RM06) = -1466.66286966

C 2.328151000 -0.504968000 -0.735272000  
C 2.006992000 0.601237000 0.033520000  
C 2.970202000 1.207208000 0.816018000  
C 4.246066000 0.668367000 0.819287000  
C 4.566096000 -0.443494000 0.043997000  
C 3.605352000 -1.041596000 -0.746776000  
C 1.167881000 -0.998271000 -1.469508000  
O 1.045744000 -1.888386000 -2.247773000  
N 0.047278000 -0.092090000 -1.121874000  
C -1.257665000 -0.659421000 -0.884302000  
C -2.338141000 -0.034312000 -1.490875000  
C -3.626402000 -0.454102000 -1.225218000  
C -3.831638000 -1.520242000 -0.366574000  
C -2.753729000 -2.166140000 0.206564000  
C -1.448985000 -1.747719000 -0.030390000  
S -0.082483000 -2.612525000 0.688256000  
C -0.562170000 -2.617162000 2.431061000  
H 5.012763000 1.121346000 1.437075000  
H 5.574216000 -0.838694000 0.066100000  
H 3.822445000 -1.911026000 -1.356321000  
H 2.727833000 2.078601000 1.414286000  
H -2.159478000 0.798876000 -2.161840000  
H -4.463812000 0.046058000 -1.695148000  
H -4.836750000 -1.867221000 -0.158290000  
H -2.919293000 -3.025405000 0.845710000  
H -0.735992000 -1.594680000 2.762055000  
H -1.432692000 -3.247993000 2.606408000  
H 0.287548000 -3.037547000 2.968197000  
N -1.064663000 2.327244000 0.771246000  
C -0.649969000 3.037888000 -0.427713000  
C 0.608346000 1.050042000 -0.174525000  
C 0.365860000 2.243039000 -1.049800000  
C -0.315809000 1.235027000 1.029425000  
O -1.158664000 4.088962000 -0.722116000  
O -0.376429000 0.518044000 1.999875000  
C -2.145972000 2.755874000 1.613410000  
H -2.936910000 2.001146000 1.634703000  
H -1.800857000 2.920665000 2.635459000  
H -2.532454000 3.686410000 1.199465000  
H 1.194296000 2.739040000 -1.540959000  
H -0.051458000 0.868259000 -1.808456000

#### TS-7D

E(RM06) = -2235.58091287

C 2.700992000 -1.043408000 -1.460708000  
C 2.784421000 0.357951000 -1.279450000  
C 4.032996000 0.938720000 -1.035447000  
C 5.186027000 0.175481000 -1.032515000  
C 5.112314000 -1.181795000 -1.278448000  
C 3.874565000 -1.776996000 -1.475987000  
C 1.435485000 -1.887659000 -1.492727000  
O 1.528552000 -3.017052000 -1.914415000  
N 0.236538000 -1.352128000 -1.001895000  
C -0.903424000 -2.119536000 -1.374854000  
C -1.166512000 -2.327570000 -2.727791000  
C -2.317830000 -2.954634000 -3.146458000  
C -3.237152000 -3.415133000 -2.215191000

|    |              |              |              |                          |              |              |              |
|----|--------------|--------------|--------------|--------------------------|--------------|--------------|--------------|
| C  | -2.989327000 | -3.231501000 | -0.873460000 | H                        | -3.377460000 | 4.083609000  | 1.230056000  |
| C  | -1.837150000 | -2.578395000 | -0.453229000 | H                        | -2.318793000 | 2.894391000  | 2.001482000  |
| S  | -1.544036000 | -2.309070000 | 1.263392000  | H                        | -1.802347000 | 3.700673000  | 0.522956000  |
| C  | -3.164193000 | -1.770456000 | 1.848805000  |                          |              |              |              |
| H  | 6.143194000  | 0.650320000  | -0.852478000 | FP                       |              |              |              |
| H  | 6.010542000  | -1.787032000 | -1.297733000 | E(RM06) = -1466.77460042 |              |              |              |
| H  | 3.792734000  | -2.848000000 | -1.613256000 | C                        | -1.486446000 | -1.886412000 | -0.596262000 |
| H  | 4.082433000  | 2.007826000  | -0.873453000 | C                        | -1.914628000 | -0.768592000 | 0.091145000  |
| H  | -0.453752000 | -1.967056000 | -3.460960000 | C                        | -3.183497000 | -0.708508000 | 0.631059000  |
| H  | -2.503335000 | -3.082526000 | -4.206124000 | C                        | -4.011149000 | -1.808793000 | 0.462407000  |
| H  | -4.142254000 | -3.916222000 | -2.536044000 | C                        | -3.579874000 | -2.933166000 | -0.232967000 |
| H  | -3.700173000 | -3.589395000 | -0.137891000 | C                        | -2.305353000 | -2.983888000 | -0.771107000 |
| H  | -3.614821000 | -1.122975000 | 1.098356000  | C                        | -0.087670000 | -1.690281000 | -1.032222000 |
| H  | -3.803062000 | -2.626074000 | 2.065079000  | O                        | 0.621572000  | -2.432854000 | -1.654388000 |
| H  | -2.991335000 | -1.214956000 | 2.772434000  | N                        | 0.271342000  | -0.438688000 | -0.540893000 |
| Rh | 0.241381000  | -0.273808000 | 0.965318000  | C                        | 1.563890000  | 0.117273000  | -0.719192000 |
| C  | 2.259713000  | -0.865427000 | 1.678003000  | C                        | 1.802060000  | 1.014507000  | -1.745682000 |
| C  | 1.318900000  | -1.779596000 | 2.119996000  | C                        | 3.063553000  | 1.555517000  | -1.924933000 |
| C  | 0.769606000  | -1.806728000 | 3.519438000  | C                        | 4.087964000  | 1.179449000  | -1.076231000 |
| C  | 0.312235000  | -0.434537000 | 4.027079000  | C                        | 3.864917000  | 0.271056000  | -0.055642000 |
| C  | -0.120200000 | 0.501885000  | 2.921451000  | C                        | 2.600906000  | -0.273367000 | 0.138875000  |
| C  | 0.735727000  | 1.386652000  | 2.261600000  | S                        | 2.196640000  | -1.434666000 | 1.398507000  |
| C  | 2.210152000  | 1.511523000  | 2.498291000  | C                        | 3.752165000  | -1.604905000 | 2.282186000  |
| C  | 2.911956000  | 0.164051000  | 2.569682000  | H                        | -5.011195000 | -1.792397000 | 0.879619000  |
| H  | 2.829276000  | -1.139755000 | 0.800446000  | H                        | -4.250415000 | -3.776203000 | -0.349276000 |
| H  | 1.226110000  | -2.710843000 | 1.562975000  | H                        | -1.943024000 | -3.850316000 | -1.312378000 |
| H  | -1.179970000 | 0.751283000  | 2.893825000  | H                        | -3.529148000 | 0.164933000  | 1.175304000  |
| H  | 0.268318000  | 2.239600000  | 1.775058000  | H                        | 0.981734000  | 1.268301000  | -2.407249000 |
| H  | 2.626243000  | 2.097365000  | 1.675804000  | H                        | 3.245275000  | 2.255800000  | -2.730611000 |
| H  | 2.389886000  | 2.098415000  | 3.409598000  | H                        | 5.082131000  | 1.590513000  | -1.208897000 |
| H  | 3.954375000  | 0.278765000  | 2.263041000  | H                        | 4.688889000  | -0.012373000 | 0.586003000  |
| H  | 2.943029000  | -0.214364000 | 3.595487000  | H                        | 4.530416000  | -2.025392000 | 1.644598000  |
| H  | 1.520642000  | -2.234067000 | 4.196335000  | H                        | 4.084227000  | -0.657123000 | 2.707275000  |
| H  | 1.104766000  | 0.041695000  | 4.611508000  | H                        | 3.550913000  | -2.302990000 | 3.093566000  |
| H  | -0.073827000 | -2.500961000 | 3.539087000  | N                        | -1.605023000 | 2.486351000  | 0.150980000  |
| H  | -0.521102000 | -0.571407000 | 4.720065000  | C                        | -1.237510000 | 2.208596000  | 1.466178000  |
| N  | 0.356531000  | 3.092886000  | -1.534004000 | C                        | -0.820473000 | 0.266110000  | 0.099606000  |
| C  | -0.253859000 | 2.163273000  | -2.385034000 | C                        | -0.533175000 | 0.877878000  | 1.466320000  |
| C  | 1.635654000  | 1.200826000  | -1.423923000 | C                        | -1.310002000 | 1.469643000  | -0.730232000 |
| C  | 0.562372000  | 0.920557000  | -2.305370000 | O                        | -1.441308000 | 2.933339000  | 2.396528000  |
| C  | 1.491792000  | 2.596878000  | -0.934926000 | O                        | -1.456150000 | 1.513786000  | -1.917660000 |
| O  | -1.206783000 | 2.396026000  | -3.071617000 | C                        | -2.206258000 | 3.728956000  | -0.269349000 |
| O  | 2.220788000  | 3.232839000  | -0.208939000 | H                        | -3.148037000 | 3.535115000  | -0.783173000 |
| C  | -0.087729000 | 4.448524000  | -1.353204000 | H                        | -2.381658000 | 4.333504000  | 0.618347000  |
| H  | -1.101894000 | 4.532062000  | -1.740521000 | H                        | -1.543413000 | 4.258390000  | -0.954653000 |
| H  | -0.067614000 | 4.707888000  | -0.294352000 | H                        | -0.853764000 | 0.262331000  | 2.306515000  |
| H  | 0.561495000  | 5.144592000  | -1.889285000 | H                        | 0.537157000  | 1.068333000  | 1.588716000  |
| H  | 0.780768000  | 0.450654000  | -3.266349000 |                          |              |              |              |
| H  | 0.100047000  | -0.073120000 | -1.720091000 |                          |              |              |              |
| C  | -2.388867000 | 1.010096000  | -0.119195000 |                          |              |              |              |
| O  | -1.189946000 | 1.129627000  | 0.345358000  |                          |              |              |              |
| O  | -2.826241000 | 0.069563000  | -0.756899000 |                          |              |              |              |
| C  | -3.331419000 | 2.189088000  | 0.213403000  |                          |              |              |              |
| C  | -4.495748000 | 1.614329000  | 1.015379000  |                          |              |              |              |
| H  | -5.012599000 | 0.837330000  | 0.449388000  |                          |              |              |              |
| H  | -4.149988000 | 1.185464000  | 1.962576000  |                          |              |              |              |
| H  | -5.212583000 | 2.406058000  | 1.252745000  |                          |              |              |              |
| C  | -3.863802000 | 2.769458000  | -1.090980000 |                          |              |              |              |
| H  | -4.342257000 | 1.992252000  | -1.688701000 |                          |              |              |              |
| H  | -4.599350000 | 3.551377000  | -0.877650000 |                          |              |              |              |
| H  | -3.064336000 | 3.202559000  | -1.697981000 |                          |              |              |              |
| C  | -2.664704000 | 3.275566000  | 1.037279000  |                          |              |              |              |



## XVII. References:

- 1) (a) Y. Ano, M. Tobisu, N. Chatani, Palladium-Catalyzed Direct ortho-Alkynylation of Aromatic Carboxylic Acid Derivatives. *Org. Lett.* 2012, **14**, 354–357; (b) Y. Aihara, N. Chatani, Ruthenium-Catalyzed Direct Arylation of C–H Bonds in Aromatic Amides Containing a Bidentate Directing Group: Significant Electronic Effects on Arylation. *Chem. Sci.*, 2013, **4**, 664–670; (c) H.-P. Bi, Z.-H. Guan, Y.-M. Liang, Palladium-Catalyzed Aryl C–H Bonds Activation/Acetoxylation Utilizing a Bidentate System. *Org. Lett.* 2009, **11**, 5726–5729.
- 2) Y. Aihara, N. Chatani, Nickel-Catalyzed Direct Alkylation of C–H Bonds in Benzamides and Acrylamides with Functionalized Alkyl Halides via Bidentate-Chelation Assistance *J. Am. Chem. Soc.* 2013, **135**, 5308–5311.
- 3) Z. Yu, S. Zhang, Z. Shen, Copper-Mediated Cyanation of Aryl C-H Bond with Removable Bidentate Auxiliary Using Acetonitrile as the Cyano Source, *Chin. J. Chem.*, 2018, **36**, 1139-1142.
- 4) G. Rouquet, N. Chatani, Ruthenium-Catalyzed *Ortho* C-H Bond Alkylation of Aromatic Amides with  $\alpha,\beta$ -Unsaturated Ketones via a Bidentate-Chelation Assistance, *Chem. Sci.*, 2013, **4**, 2201-2208.
- 5) R. Padmavathi, R. Sankar, B. Gopalakrishnan, R. Parella, S. A. Babu, Pd(OAc)<sub>2</sub>/AgOAc Catalytic System Based Bidentate Ligand Directed Regiocontrolled C-H Arylation and Alkylation of the C-3 Position of Thiophene- and Furan-2-carboxamides, *Eur. J. Org. Chem.*, 2015, 3727-3742.
- 6) M. J. Frisch et. al. Gaussian 16 ver. A.03 2016.
- 7) F. Neese, *Wiley Interdiscip. Rev. - Comput. Mol. Sci.*, 2012, **2**, 73–78.
- 8) C. Lee, W. Yang and R. G. Parr, *Phys. Rev. B*, 1988, **37**, 785–789.
- 9) A. D. Becke, *J. Chem. Phys.*, 1993, **98**, 1372–1377.
- 10) S. Grimme, J. Antony, S. Ehrlich and H. Krieg, *J. Chem. Phys.*, 2010, **132**, 154104.
- 11) Y. Zhao and D. G. Truhlar, *Theor. Chem. Acc.*, 2008, **120**, 215–241.
- 12) F. Weigend and R. Ahlrichs, *Phys. Chem. Chem. Phys.*, 2005, **7**, 3297–3305.
- 13) A. V. Marenich, C. J. Cramer and D. G. Truhlar, *J. Phys. Chem. B*, 2009, **113**, 6378–6396.
- 14) C. Riplinger, P. Pinski, U. Becker, E. F. Valeev and F. Neese, *J. Phys. Chem.*, 2016, **144**, 024109.
- 15) M. Mammen, E. I. Shakhnovich, J. M. Deutch and G. M. Whitesides, *J. Org. Chem.*, 1998, **63**, 3821–3830.
- 16) M. C. Schwarzer, R. Konno, T. Hojo, A. Ohtsuki, K. Nakamura, A. Yasutome, H. Takahashi, T. Shimasaki, M. Tobisu, N. Chatani and S. Mori, *J. Am. Chem. Soc.*, 2017, **139**, 10347–10358.
- 17) R. W. Bader, *Atoms in Molecules: A Quantum Theory*, Oxford University Press: New York, 1994.
- 18) I. Mayer, *Chem. Phys. Lett.*, 1983, **97**, 270–274.
- 19) A. E. Reed, R. B. Weinstock and F. Weinhold, *J. Chem. Phys.*, 1985, **83**, 735.
- 20) A. J. W. Thom, E. J. Sundstrom and M. Head-Gordon, *Phys. Chem. Chem. Phys.*, 2009, **11**, 11297.
- 21) K. Morokuma and K. Kitaura, *Int. J. Quantum Chem.*, 1976, **10**, 325–340.

- 22) T. Lu and F. Chen, *J. Comput. Chem.*, 2012, **33**, 580–592.
- 23) E. D. Glendening, K. Badenhop, A. E. Reed, J. E. Carpenter, J. A. Bohmann, C. M. Morales, C. R. Landis and F. Weinhold, 2013.
- 24) S. Kozuch and S. Shaik, *Acc. Chem. Res.*, 2011, **44**, 101–110.
- 25) A. Uhe, S. Kozuch and S. Shaik, *J. Comput. Chem.*, 2010, **32**, 978–985.
- 26) C. Bannwarth, S. Ehlert and S. Grimme, *J. Chem. Theory Comput.*, 2019, **15**, 1652–1671.
- 27) C. Bannwarth, E. Caldeweyher, S. Ehlert, A. Hansen, P. Pracht, J. Seibert, S. Spicher and S. Grimme, *Comput. Mol. Sci.*, 2020, **11**,
- 28) E. R. Johnson, S. Keinan, P. Mori-Sanchez, J. Contreras-Garcia, A. J. Cohen and W. Yang, *J. Am. Chem. Soc.*, 2010, **132**, 6498–6506.
- 29) Chemcraft - graphical software for visualization of quantum chemistry computations,  
<https://www.chemcraftprog.com>.
- 30) A. Deb, A. Hazra, Q. Peng, R. S. Paton, D. Maiti, *J. Am. Chem. Soc.*, 2017, **139**, 763–775.
